# Supplementary material for: An umpolung strategy for chemoselective metal-free [4 + 2] annulation of azlactones: access to tetrahydro-β-carbolin 1,3-diketone frameworks
Source: Royal Society of Chemistry journal article supplement (doi:10.1039/d3qo01184d), 2023-12-12

# **Umpolung strategy for chemoselective metal-free [4+2] annulations of azlactones: access to tetrahydro $\beta$ -carbolin 1,3-diketones frameworks**

Meng Wang, Ze-Hong Zheng, Mu-Qiu Chen, Gu Zhan, Jie Wang, Qian-Qian Yang \* and Wei Huang \*

*State Key Laboratory of Southwestern Chinese Medicine Resources, Hospital of Chengdu University of  
Traditional Chinese Medicine, School of Pharmacy, Chengdu University of Traditional Chinese Medicine,  
Chengdu, 611137, China.*

## **Supporting Information**

### **Table of Contents**

|                                                                                       |           |
|---------------------------------------------------------------------------------------|-----------|
| <b>1. General information .....</b>                                                   | <b>2</b>  |
| <b>2. Attempt of asymmetric versions .....</b>                                        | <b>3</b>  |
| <b>3. General procedure for the synthesis of products 3 .....</b>                     | <b>7</b>  |
| <b>4. Scale-up reaction and transformations of product 3a .....</b>                   | <b>21</b> |
| <b>5. Control experiments .....</b>                                                   | <b>23</b> |
| <b>6. Single crystal X-ray diffraction analysis and crystal data .....</b>            | <b>25</b> |
| <b>7. DFT calculations .....</b>                                                      | <b>27</b> |
| <b>8. <math>^1\text{H}</math> NMR and <math>^{13}\text{C}</math> NMR spectra.....</b> | <b>44</b> |
| <b>9. HPLC spectra .....</b>                                                          | <b>72</b> |
| <b>10. References .....</b>                                                           | <b>79</b> |

---

## 1. General information

Nuclear magnetic resonance (NMR) spectra were recorded in DMSO- $d_6$  on JEOL 600 NMR instrument. Proton chemical shifts are reported in parts per million ( $\delta$  scale). The  $^1\text{H}$  NMR chemical shifts are reported in ppm with the internal TMS signal at 0.0 ppm as standard. The  $^{13}\text{C}$  NMR chemical shifts were given using DMSO- $d_6$  as the internal standard (DMSO- $d_6$ :  $\delta = 39.50$  ppm). Data are reported as follows: chemical shift [multiplicity (s = singlet, d = doublet, dd = doublet of doublets, t = triplet, q = quartet, quin = quintet, m = multiplet, td = triplet doublet, br s = broad singlet), coupling constant( $J$ ) (Hz), integration]. High-resolution mass spectra (HRMS) were obtained using Agilent P/N G1969-90010 or Waters/Acquity UPLC-Synapt G2HDMS. High-resolution mass spectra were reported for the molecular ion  $[\text{M}+\text{Na}]^+$ . X-ray diffraction experiment was carried out on an Agilent Gemini and the data obtained were deposited at the Cambridge Crystallographic Data Centre. UV detection was performed at 254 nm. Column chromatography was performed on silica gel (200-300 mesh) using an eluent of ethyl acetate (EtOAc) and petroleum ether (PE). TLC was performed on glass-backed silica plates; products were visualized using UV light. All reagents and solvents were obtained commercially and used without further purification. *N*-alkoxy indol-2-ylamides **1**<sup>[2]</sup>, azolactones **2**<sup>[1]</sup> were prepared according to the literature procedures. Melting points were recorded on the BUCHI Melting Point M-565 instrument. Unless otherwise noted, all reagents were obtained commercially and used without further purification.

## 2. Attempt of asymmetric versions

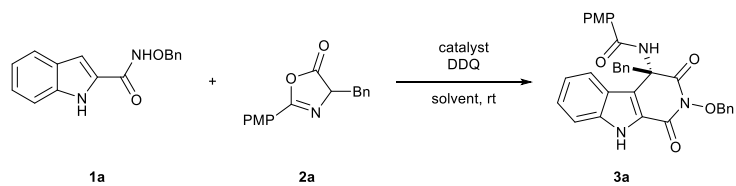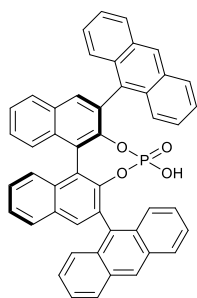

C1

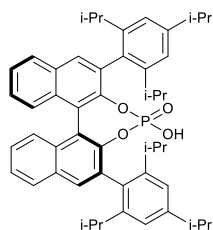

C2

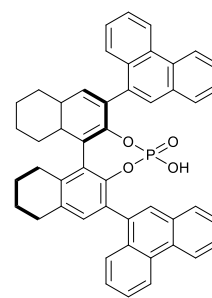

C3

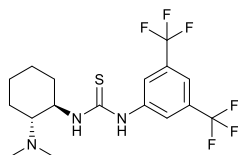

C4

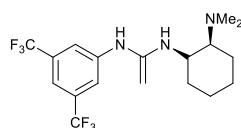

C5

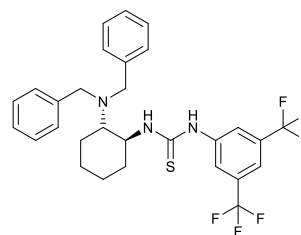

C6

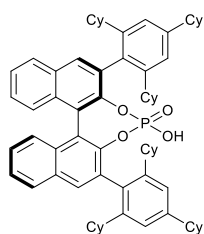

C7

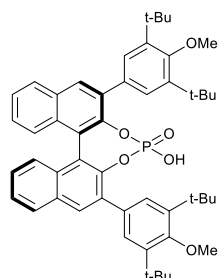

C8

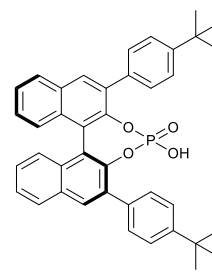

C9

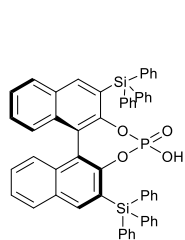

C10

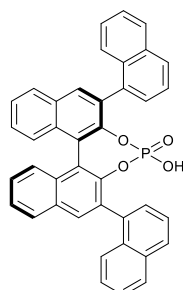

C11

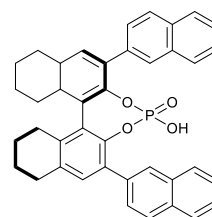

C12

| entry <sup>a</sup> | oxidant | catalyst.  | solvent           | yield (%) <sup>b</sup> | ee (%) <sup>c</sup> |
|--------------------|---------|------------|-------------------|------------------------|---------------------|
| 1                  | DDQ     | <b>C1</b>  | DCM               | 35                     | 20                  |
| 2                  | DDQ     | <b>C2</b>  | DCM               | 40                     | 25                  |
| 3                  | DDQ     | <b>C3</b>  | DCM               | 45                     | 11                  |
| 4                  | DDQ     | <b>C4</b>  | DCM               | 30                     | 5                   |
| 5                  | DDQ     | <b>C5</b>  | DCM               | 33                     | <5                  |
| 6                  | DDQ     | <b>C6</b>  | DCM               | 38                     | <5                  |
| 7                  | DDQ     | <b>C7</b>  | DCM               | 28                     | <5                  |
| 8                  | DDQ     | <b>C8</b>  | DCM               | 33                     | 7                   |
| 9                  | DDQ     | <b>C9</b>  | DCM               | 40                     | 5                   |
| 10                 | DDQ     | <b>C10</b> | DCM               | 30                     | <5                  |
| 11                 | DDQ     | <b>C11</b> | DCM               | 48                     | 10                  |
| 12                 | DDQ     | <b>C12</b> | DCM               | 40                     | 10                  |
| 13                 | DDQ     | <b>C2</b>  | toluene           | 46                     | 95                  |
| 14                 | DDQ     | <b>C2</b>  | CHCl <sub>3</sub> | -                      | -                   |
| 15                 | DDQ     | <b>C2</b>  | actone            | -                      | -                   |

<sup>a</sup>Reaction conditions: **1a** (0.1 mmol, 1.0 equiv), **2a** (0.2 mmol, 2.0 equiv), DDQ (0.2 mmol, 2.0 equiv) and **C** (20 mol%) in 2.0 mL of toluene at rt for 12h. <sup>b</sup>Isolate yield. <sup>c</sup>The ee value determined by HPLC analysis.

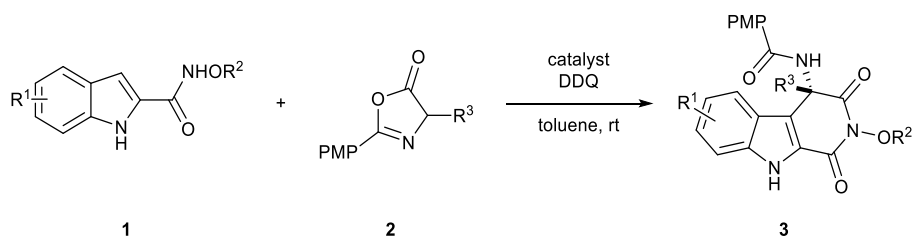

| entry <sup>a</sup> | R <sup>1</sup> | R <sup>2</sup> | R <sup>3</sup> | catalyst. | yield (%) <sup>b</sup> | ee (%) <sup>c</sup> |
|--------------------|----------------|----------------|----------------|-----------|------------------------|---------------------|
| 1                  | 5-F            | Bn             | Bn             | <b>C1</b> | 32                     | 45                  |
| 2                  | 6-Cl           | Bn             | Bn             | <b>C1</b> | 34                     | 47                  |
| 3                  | 5-Me           | Bn             | Bn             | <b>C1</b> | 30                     | 5                   |
| 4                  | 6-OMe          | Bn             | Bn             | <b>C1</b> | 38                     | 17                  |
| 5                  | -              | Bn             | 2-Me-Bn        | <b>C1</b> | 35                     | 17                  |
| 6                  |                | Bn             | 4-Cl-Bn        | <b>C1</b> | 24                     | 21                  |
| 7                  |                | Bn             | 3-Br-Bn        | <b>C1</b> | 20                     | 7                   |
| 8                  |                | Bn             | 2-Cl-Bn        | <b>C1</b> | 36                     | 11                  |
| 9                  |                | Bn             | 2-Me-Bn        | <b>C2</b> | 43                     | 7                   |
| 10                 |                | Bn             | 3-Br-Bn        | <b>C2</b> | 38                     | 21                  |
| 11                 |                | Bn             | 2-Cl-Bn        | <b>C2</b> | 30                     | <5                  |
| 12                 | 5-F            | Bn             | Bn             | <b>C2</b> | 28                     | <5                  |
| 13                 | 6-Cl           | Bn             | Bn             | <b>C2</b> | 38                     | 35                  |
| 14                 | -              | Bn             | Bn             | <b>C2</b> | 46                     | 95                  |
| 15                 | -              | Bn             | Ph             | <b>C2</b> | 29                     | <5                  |
| 16                 |                | Ph             | Bn             | <b>C2</b> | 42                     | 9                   |
| 17                 | -              | Me             | Bn             | <b>C2</b> | 38                     | 33                  |
| 18                 | -              | Bn             | 4-Cl-Bn        | <b>C2</b> | 34                     | 33                  |

<sup>a</sup>Reaction conditions: **1** (0.1 mmol, 1.0 equiv), **2** (0.2 mmol, 2.0 equiv), DDQ (0.2mmol, 2.0 equiv) and **C** (20 mol%) in 2.0 mL of toluene at rt for 12 h. <sup>b</sup>Isolate yield. <sup>c</sup>The ee value determined by HPLC analysis.

To a mixture of *N*-alkoxy indol-2-ylamides **1** (0.1 mmol), azolactones **2** (0.2 mmol), DDQ (0.2 mmol) in DCM (2.0 mL) was added chiral catalysts (20 mol%) at room temperature for 12 h. By examining several chiral catalyst types, the chiral product **3a**

---

was created in 46% yield with the highest result being 95% ee. Unfortunately, the reaction might be inhibited by the chiral catalyst, which lowers the reaction yield.

### 3. General procedure for the synthesis of products 3

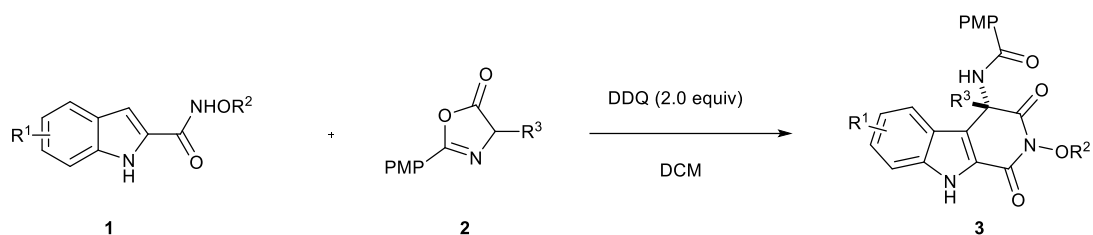

General procedure A: To a mixture of *N*-alkoxy indol-2-ylamides **1** (0.1 mmol), azolactones **2** (0.2 mmol) in DCM (2.0 mL) was added DDQ (45.4 mg, 0.2 mmol) at room temperature for 12 h. After completed (monitored by TLC), the reaction mixture was purified by flash chromatography on silica gel (PE/EA = 5/1) to give the pure products **3**.

General procedure B: To a mixture of *N*-alkoxy indol-2-ylamides **1** (0.1 mmol), azolactones **2** (0.05 mmol each time) in four batches, with an interval of three hours in DCM (2.0 mL) was added DDQ (45.4 mg, 0.2 mmol) at room temperature for 12 h. After completed (monitored by TLC), the reaction mixture was purified by flash chromatography on silica gel (PE/EA = 5/1) to give the pure products **3**.

#### Ethyl *N*-(4-benzyl-2-(benzyloxy)-1,3-dioxo-2,3,4,9-tetrahydro-1*H*-pyrido[3,4-*b*]indol-4-yl)-4-methoxybenzamide (**3a**)

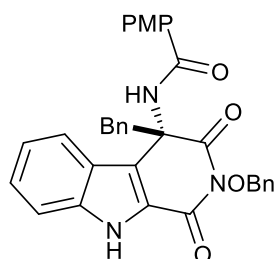

The residue was purified by flash chromatography (PE/EA = 5/1) giving the product **3a** as a white solid in 75% yield (41.0 mg), m. p. 285.3 – 286.0 °C. <sup>1</sup>H NMR (600 MHz, DMSO-*d*<sub>6</sub>) δ 12.12 (s, 1H), 9.80 (s, 1H), 8.11 (d, *J* = 7.8 Hz, 1H), 7.91 (d, *J* = 9.0 Hz, 2H), 7.52 – 7.51 (m, 3H), 7.44 – 7.40 (m, 3H), 7.37 (t, *J* = 7.2 Hz, 1H), 7.21 (t, *J* = 7.8 Hz, 1H), 7.12 (t, *J* = 7.2 Hz, 1H), 7.06 – 7.02 (m, 4H), 6.48 (d, *J* = 7.8 Hz, 2H), 4.80 (d, *J* = 9.6 Hz, 1H), 4.61 (s, 1H), 3.83 (d, *J* = 12.6 Hz, 1H), 3.81 (s, 3H), 3.59 (d, *J* = 12.6 Hz, 1H). <sup>13</sup>C NMR (150 MHz, DMSO-*d*<sub>6</sub>) δ 170.1, 165.5, 162.1, 155.7, 138.5, 134.5, 133.0, 129.61, 129.57, 129.3, 128.8, 128.4, 127.9, 127.3, 125.8, 124.9, 123.8, 122.9, 120.8, 120.6, 113.6, 113.4, 77.2, 61.4, 55.4, 44.7. HRMS (ESI-TOF) *m/z* [M + Na]<sup>+</sup> Calcd for C<sub>33</sub>H<sub>27</sub>N<sub>3</sub>O<sub>5</sub>Na<sup>+</sup> 568.1843; found 568.1843.

**Ethyl *N*-(4-benzyl-2-(benzyloxy)-6-methyl-1,3-dioxo-2,3,4,9-tetrahydro-1*H*-pyrido[3,4-*b*]indol-4-yl)-4-methoxybenzamide (3b)**

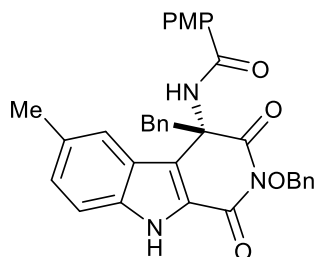

The residue was purified by flash chromatography (PE/EA = 5/1) giving the product **3b** as a white solid in 82% yield (46.0 mg), m. p. 223.2 – 224.1 °C. <sup>1</sup>H NMR (600 MHz, DMSO-*d*<sub>6</sub>) δ 12.00 (s, 1H), 9.77 (s, 1H), 7.91 (t, *J* = 8.4 Hz, 3H), 7.52 (d, *J* = 6.6 Hz, 2H), 7.43 – 7.39 (m, 4H), 7.20 (d, *J* = 9.0 Hz, 1H), 7.12 (t, *J* = 7.2 Hz, 1H), 7.04 (t, *J* = 7.8 Hz, 4H), 6.49 (d, *J* = 7.2 Hz, 2H), 4.78 (d, *J* = 9.0 Hz, 1H), 4.60 (s, 1H), 3.84 (d, *J* = 12.6 Hz, 1H), 3.82 (s, 3H), 3.57 (d, *J* = 12.6 Hz, 1H), 2.43 (s, 3H). <sup>13</sup>C NMR (150 MHz, DMSO-*d*<sub>6</sub>) δ 170.2, 165.4, 162.1, 155.7, 137.0, 134.5, 133.1, 129.62, 129.60, 129.3, 128.8, 128.4, 127.8, 127.7, 127.3, 125.0, 123.8, 123.2, 119.99, 119.90, 113.6, 113.1, 77.2, 61.4, 55.4, 44.6, 21.4. HRMS (ESI-TOF) *m/z* [M + Na]<sup>+</sup> Calcd for C<sub>34</sub>H<sub>29</sub>N<sub>3</sub>O<sub>5</sub>Na<sup>+</sup> 582.1999; found 582.2003.

**Ethyl *N*-(4-benzyl-2-(benzyloxy)-7-methoxy-1,3-dioxo-2,3,4,9-tetrahydro-1*H*-pyrido[3,4-*b*]indol-4-yl)-4-methoxybenzamide (3c)**

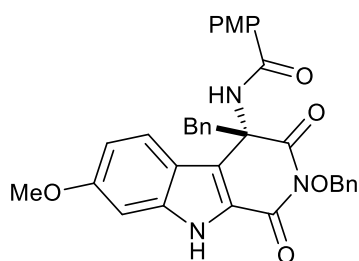

The residue was purified by flash chromatography (PE/EA = 5/1) giving the product **3c** as a white solid in 73% yield (42.0 mg), m. p. 257.8 – 258.5 °C. <sup>1</sup>H NMR (600 MHz, DMSO-*d*<sub>6</sub>) δ 11.92 (s, 1H), 9.73 (s, 1H), 7.97 (d, *J* = 9.0 Hz, 1H), 7.90 (d, *J* = 8.4 Hz, 2H), 7.52 (d, *J* = 5.4 Hz, 2H), 7.43 – 7.39 (m, 3H), 7.12 (t, *J* = 7.2 Hz, 1H), 7.07 – 7.02 (m, 4H), 6.91 (d, *J* = 1.8 Hz, 1H), 6.87 (dd, *J* = 8.4, 2.4 Hz, 1H), 6.50 (d, *J* = 7.2 Hz, 2H), 4.78 (d, *J* = 9.6 Hz, 1H), 4.59 (s, 1H), 3.82 (s, 6H), 3.78 (d, *J* = 13.2 Hz, 1H), 3.56 (d, *J* = 12.6 Hz, 1H). <sup>13</sup>C NMR (150 MHz, DMSO-*d*<sub>6</sub>) δ 170.1, 165.4, 162.1, 158.6, 155.4, 139.9, 134.5, 133.0, 129.6, 129.3, 128.8, 128.4, 127.8, 127.3, 125.0, 122.7, 121.7, 121.4, 117.3, 113.6, 112.5, 94.7, 77.2, 61.3, 55.4, 55.2, 44.9. HRMS (ESI-TOF) *m/z* [M + Na]<sup>+</sup> Calcd for C<sub>34</sub>H<sub>29</sub>N<sub>3</sub>O<sub>6</sub>Na<sup>+</sup> 598.1949; found 598.1955.



**Ethyl** *N*-(4-benzyl-2-(benzyloxy)-6-fluoro-1,3-dioxo-2,3,4,9-tetrahydro-1*H*-pyrido[3,4-*b*]indol-4-yl)-4-methoxybenzamide (**3d**)

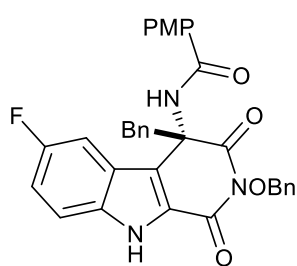

The residue was purified by flash chromatography (PE/EA = 5/1) giving the product **3d** as a white solid in 60% yield (34.0 mg), m. p. 259.2 – 260.1 °C. <sup>1</sup>H NMR (600 MHz, DMSO-*d*<sub>6</sub>) δ 12.28 (s, 1H), 9.74 (s, 1H), 7.92 – 7.90 (m, 3H), 7.55 – 7.52 (m, 3H), 7.44 – 7.40 (m, 3H), 7.26 (td, *J* = 9.0, 2.4 Hz, 1H), 7.13 (t, *J* = 7.2 Hz, 1H), 7.07 – 7.04 (m, 4H), 6.51 (d, *J* = 7.2 Hz, 2H), 4.81 (d, *J* = 9.0 Hz, 1H), 4.63 (s, 1H), 3.87 (d, *J* = 27.0 Hz, 1H), 3.82 (s, 4H), 3.56 (d, *J* = 12.6 Hz, 1H). <sup>13</sup>C NMR (150 MHz, DMSO-*d*<sub>6</sub>) δ 169.9, 165.4, 162.1, 157.3 (d, *J* = 234.0 Hz), 155.5, 135.2, 134.4, 133.0, 129.6 (d, *J* = 4.5 Hz), 129.3, 128.8, 128.4, 127.9, 127.4, 125.3, 124.8, 122.8 (d, *J* = 10.5 Hz), 120.4 (d, *J* = 6.0 Hz), 115.0 (d, *J* = 10.5 Hz), 114.8 (d, *J* = 27.0 Hz), 113.7, 105.2 (d, *J* = 22.5 Hz), 77.3, 61.2, 55.4, 44.4. HRMS (ESI-TOF) *m/z* [M + Na]<sup>+</sup> Calcd for C<sub>33</sub>H<sub>26</sub>FN<sub>3</sub>O<sub>5</sub>Na<sup>+</sup> 586.1749; found 586.1746.

**Ethyl** *N*-(4-benzyl-2-(benzyloxy)-6-bromo-1,3-dioxo-2,3,4,9-tetrahydro-1*H*-pyrido[3,4-*b*]indol-4-yl)-4-methoxybenzamide (**3e**)

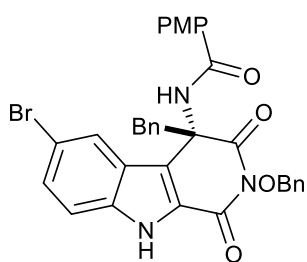

The residue was purified by flash chromatography (PE/EA = 5/1) giving the product **3e** as a white solid in 45% yield (28.0 mg), m. p. 153.2 – 154.6 °C. <sup>1</sup>H NMR (600 MHz, DMSO-*d*<sub>6</sub>) δ 12.40 (s, 1H), 9.83 (s, 1H), 8.38 (s, 1H), 7.92 (d, *J* = 9.0 Hz, 2H), 7.51 (d, *J* = 5.4 Hz, 2H), 7.49 (d, *J* = 1.2 Hz, 2H), 7.44 – 7.40 (m, 3H), 7.13 (t, *J* = 7.8 Hz, 1H), 7.08 – 7.04 (m, 4H), 6.50 (d, *J* = 7.2 Hz, 2H), 4.80 (d, *J* = 9.6 Hz, 1H), 4.62 (s, 1H), 3.85 (d, *J* = 12.6 Hz, 1H), 3.83 (s, 3H), 3.56 (d, *J* = 12.6 Hz, 1H). <sup>13</sup>C NMR (150 MHz, DMSO-*d*<sub>6</sub>) δ 169.8, 165.4, 162.2, 155.4, 137.1, 134.4, 132.9, 129.6, 129.3, 128.9, 128.44, 128.37, 127.9, 127.4, 124.9, 124.7, 124.4, 123.0, 119.9, 115.5, 113.7, 113.4, 77.3, 61.2, 55.4, 44.5. HRMS (ESI-TOF) *m/z* [M + Na]<sup>+</sup> Calcd for C<sub>33</sub>H<sub>26</sub>BrN<sub>3</sub>O<sub>5</sub>Na<sup>+</sup> 646.0948; found 646.0956.

**Ethyl *N*-(4-benzyl-2-(benzyloxy)-7-chloro-1,3-dioxo-2,3,4,9-tetrahydro-1*H*-pyrido[3,4-*b*]indol-4-yl)-4-methoxybenzamide (3f)**

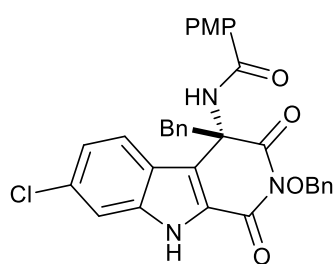

The residue was purified by flash chromatography (PE/EA = 5/1) giving the product **3f** as a white solid in 59% yield (34.0 mg), m. p. 261.2 – 262.6 °C. <sup>1</sup>H NMR (600 MHz, DMSO-*d*<sub>6</sub>) δ 12.31 (s, 1H), 9.80 (s, 1H), 8.12 (d, *J* = 8.4 Hz, 1H), 7.90 (d, *J* = 9.0 Hz, 2H), 7.52 (d, *J* = 5.4 Hz, 3H),

7.44 – 7.39 (m, 3H), 7.26 (dd, *J* = 8.4, 1.8 Hz, 1H), 7.13 (t, *J* = 7.8 Hz, 1H), 7.08 – 7.02 (m, 4H), 6.50 (d, *J* = 7.8 Hz, 2H), 4.82 (d, *J* = 9.6 Hz, 1H), 4.63 (s, 1H), 3.82 (s, 3H), 3.80 (d, *J* = 12.6 Hz, 3H), 3.59 (d, *J* = 12.6 Hz, 1H). <sup>13</sup>C NMR (150 MHz, DMSO-*d*<sub>6</sub>) δ 170.0, 165.6, 162.1, 155.4, 138.8, 134.4, 132.9, 130.5, 129.63, 129.58, 129.3, 128.9, 128.4, 127.9, 127.4, 124.8, 124.6, 122.4, 121.7, 121.6, 120.8, 113.6, 112.8, 77.3, 61.3, 55.4, 44.7. HRMS (ESI-TOF) *m/z* [M + Na]<sup>+</sup> Calcd for C<sub>33</sub>H<sub>26</sub>ClN<sub>3</sub>O<sub>5</sub>Na<sup>+</sup> 602.1453; found 602.1454.

**Ethyl *N*-(2-(benzyloxy)-1,3-dioxo-4-phenyl-2,3,4,9-tetrahydro-1*H*-pyrido[3,4-*b*]indol-4-yl)-4-methoxybenzamide (3g)**

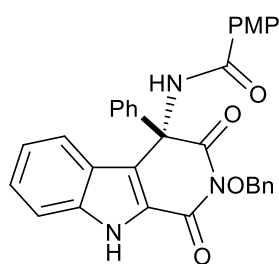

The residue was purified by flash chromatography (PE/EA = 5/1) giving the product **3g** as a white solid in 94% yield (50.0 mg), m. p. 183.3 – 184.2 °C. <sup>1</sup>H NMR (600 MHz, DMSO-*d*<sub>6</sub>) δ 12.46 (s, 1H), 9.97 (s, 1H), 7.95 (d, *J* = 8.4 Hz, 2H), 7.78 (d, *J* = 8.4 Hz, 1H), 7.54 (d, *J* = 8.4 Hz, 1H), 7.40 – 7.38 (m, 5H),

7.36 – 7.35 (m, 2H), 7.33 – 7.29 (m, 4H), 7.02 (t, *J* = 7.2 Hz, 1H), 6.98 (d, *J* = 8.4 Hz, 2H), 4.98 – 4.94 (m, 2H), 3.80 (s, 3H). <sup>13</sup>C NMR (150 MHz, DMSO-*d*<sub>6</sub>) δ 169.4, 166.2, 162.1, 156.2, 138.8, 137.3, 134.3, 129.9, 129.4, 129.0, 128.8, 128.6, 128.3, 127.7, 125.8, 124.9, 123.9, 123.3, 121.8, 120.9, 120.7, 113.5, 113.3, 77.0, 63.2, 55.4. HRMS (ESI-TOF) *m/z* [M + Na]<sup>+</sup> Calcd for C<sub>32</sub>H<sub>25</sub>N<sub>3</sub>O<sub>5</sub>Na<sup>+</sup> 554.1686; found 554.1687.

**Ethyl *N*-(2-(benzyloxy)-6-methyl-1,3-dioxo-4-phenyl-2,3,4,9-tetrahydro-1*H*-pyrido[3,4-*b*]indol-4-yl)-4-methoxybenzamide (3h)**

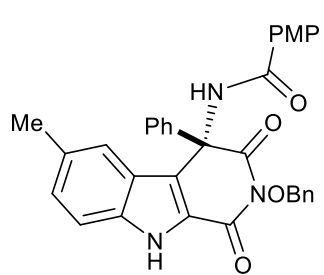

The residue was purified by flash chromatography (PE/EA = 5/1) giving the product **3h** as a white solid in 97% yield (53.0 mg), m. p. 220.1 – 221.0 °C. <sup>1</sup>H NMR (600 MHz, DMSO-*d*<sub>6</sub>) δ 12.34 (s, 1H), 9.95 (s, 1H), 7.96 (d, *J* = 9.0 Hz, 2H), 7.58 (s, 1H), 7.43 (d, *J* = 8.4 Hz, 1H), 7.40 – 7.38 (m, 5H), 7.37 – 7.35 (m, 2H), 7.33 – 7.31 (m, 3H), 7.13 (d, *J* = 8.4 Hz, 1H), 6.99 (d, *J* = 8.4 Hz, 2H), 4.98 – 4.94 (m, 2H), 3.80 (s, 3H), 2.24 (s, 3H). <sup>13</sup>C NMR (150 MHz, DMSO-*d*<sub>6</sub>) δ 169.4, 166.2, 162.1, 156.2, 137.3, 137.2, 134.3, 129.9, 129.42, 129.37, 128.9, 128.7, 128.5, 128.2, 127.75, 127.68, 124.9, 123.8, 123.5, 120.8, 120.2, 113.5, 113.0, 76.9, 63.2, 55.4, 21.2. HRMS (ESI-TOF) *m/z* [M + Na]<sup>+</sup> Calcd for C<sub>33</sub>H<sub>27</sub>N<sub>3</sub>O<sub>5</sub>Na<sup>+</sup> 568.1843; found 568.1839.

**Ethyl *N*-(2-(benzyloxy)-7-methoxy-1,3-dioxo-4-phenyl-2,3,4,9-tetrahydro-1*H*-pyrido[3,4-*b*]indol-4-yl)-4-methoxybenzamide (3i)**

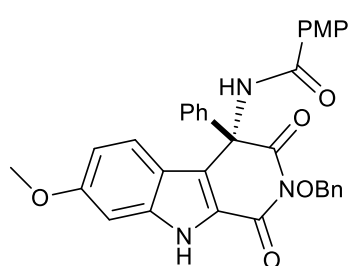

The residue was purified by flash chromatography (PE/EA = 5/1) giving the product **3i** as a white solid in 93% yield (52.0 mg), m. p. 160.3 – 161.2 °C. <sup>1</sup>H NMR (600 MHz, DMSO-*d*<sub>6</sub>) δ 12.26 (s, 1H), 9.92 (s, 1H), 7.94 (d, *J* = 9.0 Hz, 2H), 7.66 (d, *J* = 9.0 Hz, 1H), 7.41 – 7.38 (m, 5H), 7.35 – 7.32 (m, 5H), 6.98 (d, *J* = 9.0 Hz, 2H), 6.92 (d, *J* = 1.8 Hz, 1H), 6.69 (dd, *J* = 9.0, 1.8 Hz, 1H), 4.96 – 4.93 (m, 2H), 3.80 (s, 3H), 3.78 (s, 3H). <sup>13</sup>C NMR (150 MHz, DMSO-*d*<sub>6</sub>) δ 169.3, 166.1, 162.0, 158.7, 155.9, 140.2, 137.4, 134.4, 129.9, 129.4, 128.9, 128.7, 128.5, 128.2, 127.6, 124.9, 122.7, 122.6, 121.7, 117.7, 113.5, 112.4, 94.5, 76.9, 63.1, 55.4, 55.2. HRMS (ESI-TOF) *m/z* [M + Na]<sup>+</sup> Calcd for C<sub>33</sub>H<sub>27</sub>N<sub>3</sub>O<sub>6</sub>Na<sup>+</sup> 584.1792; found 584.1786.

**Ethyl** *N*-(2-(benzyloxy)-6-fluoro-1,3-dioxo-4-phenyl-2,3,4,9-tetrahydro-1*H*-pyrido[3,4-*b*]indol-4-yl)-4-methoxybenzamide (**3j**)

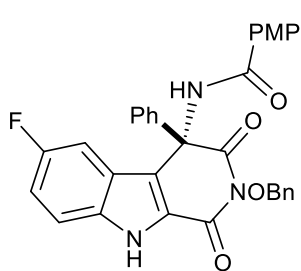

The residue was purified by flash chromatography (PE/EA = 5/1) giving the product **3j** as a white solid in 91% yield (50.0 mg), m. p. 247.3 – 248.1 °C. <sup>1</sup>H NMR (600 MHz, DMSO-*d*<sub>6</sub>) δ 12.61 (s, 1H), 9.93 (s, 1H), 7.94 (d, *J* = 9.0 Hz, 2H), 7.60 (d, *J* = 9.6 Hz, 1H), 7.56 – 7.54 (m, 1H), 7.42 – 7.38 (m, 5H), 7.35 (d, *J* = 8.4 Hz, 2H), 7.32 – 7.31 (m, 3H), 7.19 (t, *J* = 8.4 Hz, 1H), 7.00 (d, *J* = 7.8 Hz, 2H), 4.98 – 4.93 (m, 2H), 3.80 (s, 3H). <sup>13</sup>C NMR (150 MHz, DMSO-*d*<sub>6</sub>) δ 169.1, 166.2, 162.1, 157.3 (d, *J* = 234.0 Hz), 156.0, 136.3 (d, *J* = 237.0 Hz), 134.2, 129.9, 129.4, 129.1, 128.8, 128.6, 128.2, 127.6, 125.5, 124.7, 123.2 (d, *J* = 12.0 Hz), 120.5 (d, *J* = 6.0 Hz), 114.9 (d, *J* = 15.0 Hz), 114.8, 113.6, 105.9 (d, *J* = 24.0 Hz), 77.0, 62.9, 55.4. HRMS (ESI-TOF) *m/z* [M + Na]<sup>+</sup> Calcd for C<sub>32</sub>H<sub>24</sub>FN<sub>3</sub>O<sub>5</sub>Na<sup>+</sup> 572.1592; found 572.1589.

**Ethyl** *N*-(2-(benzyloxy)-6-bromo-1,3-dioxo-4-phenyl-2,3,4,9-tetrahydro-1*H*-pyrido[3,4-*b*]indol-4-yl)-4-methoxybenzamide (**3k**)

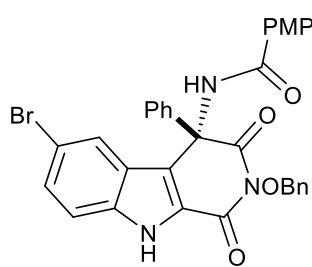

The residue was purified by flash chromatography (PE/EA = 5/1) giving the product **3k** as a white solid in 90% yield (55.0 mg), m. p. 256.9 – 257.6 °C. <sup>1</sup>H NMR (600 MHz, DMSO-*d*<sub>6</sub>) δ 12.72 (s, 1H), 10.03 (s, 1H), 8.09 (s, 1H), 7.96 (d, *J* = 8.4 Hz, 2H), 7.51 (d, *J* = 8.4 Hz, 1H), 7.43 – 7.39 (m, 6H), 7.36 – 7.31 (m, 5H), 7.01 (d, *J* = 8.4 Hz, 2H), 4.98 – 4.94 (m, 2H), 3.81 (s, 3H). <sup>13</sup>C NMR (150 MHz, DMSO-*d*<sub>6</sub>) δ 168.9, 166.2, 162.2, 156.0, 137.3, 137.0, 134.2, 129.9, 129.4, 129.1, 128.8, 128.6, 128.5, 128.2, 127.6, 125.1, 124.72, 124.70, 123.7, 120.0, 115.4, 113.6, 113.4, 77.0, 62.9, 55.4. HRMS (ESI-TOF) *m/z* [M + Na]<sup>+</sup> Calcd for C<sub>32</sub>H<sub>24</sub>BrN<sub>3</sub>O<sub>5</sub>Na<sup>+</sup> 632.0792; found 632.0796.

**Ethyl** *N*-(2-(benzyloxy)-7-fluoro-1,3-dioxo-4-phenyl-2,3,4,9-tetrahydro-1*H*-pyrido[3,4-*b*]indol-4-yl)-4-methoxybenzamide (**3l**)

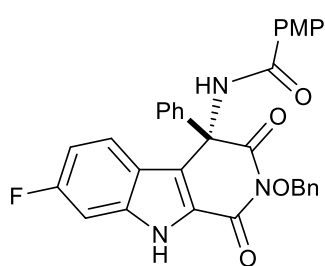

The residue was purified by flash chromatography (PE/EA = 5/1) giving the product **3l** as a white solid in 91% yield (50.0 mg), m. p. 270.2 – 271.0 °C. <sup>1</sup>H NMR (600 MHz, DMSO-*d*<sub>6</sub>) δ 12.59 (s, 1H), 9.98 (s, 1H), 7.94 (d, *J* = 8.4 Hz, 2H), 7.82 (dd, *J* = 9.0, 5.4 Hz, 1H), 7.41 – 7.38 (m, 5H), 7.36 – 7.31 (m, 5H), 7.26 (d, *J* = 12.0 Hz, 1H), 6.99 (d, *J* = 9.0 Hz, 2H), 6.96 – 6.94 (m, 1H), 4.98 – 4.93 (m, 2H), 3.80 (s, 3H). <sup>13</sup>C NMR (150 MHz, DMSO-*d*<sub>6</sub>) δ 169.2, 166.2, 162.1, 161.1 (d, *J* = 240.0 Hz), 155.9, 139.0 (d, *J* = 13.5 Hz), 137.1, 134.2, 129.9, 129.4, 129.1, 128.8, 128.6, 128.2, 127.6, 124.8, 124.6 (d, *J* = 3.0 Hz), 123.5 (d, *J* = 9.0 Hz), 121.2, 120.2, 113.5, 110.3 (d, *J* = 24.0 Hz), 98.8 (d, *J* = 25.5 Hz), 77.0, 63.1, 55.4. HRMS (ESI-TOF) *m/z* [M + Na]<sup>+</sup> Calcd for C<sub>32</sub>H<sub>24</sub>FN<sub>3</sub>O<sub>5</sub>Na<sup>+</sup> 572.1592; found 572.1595.

**Ethyl** *N*-(2-(benzyloxy)-7-chloro-1,3-dioxo-4-phenyl-2,3,4,9-tetrahydro-1*H*-pyrido[3,4-*b*]indol-4-yl)-4-methoxybenzamide (**3m**)

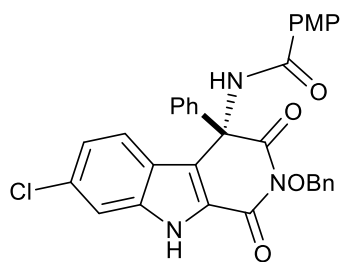

The residue was purified by flash chromatography (PE/EA = 5/1) giving the product **3m** as a white solid in 80% yield (45.0 mg), m. p. 193.3 – 194.1 °C. <sup>1</sup>H NMR (600 MHz, DMSO-*d*<sub>6</sub>) δ 12.64 (s, 1H), 9.99 (s, 1H), 7.94 (d, *J* = 8.4 Hz, 2H), 7.82 (d, *J* = 8.4 Hz, 1H), 7.55 (d, *J* = 1.8 Hz, 1H), 7.42 – 7.38 (m, 5H), 7.36 – 7.31 (m, 5H), 7.09 (dd, *J* = 8.4, 1.8 Hz, 1H), 6.99 (d, *J* = 9.0 Hz, 2H), 4.98 – 4.94 (m, 2H), 3.80 (s, 3H). <sup>13</sup>C NMR (150 MHz, DMSO-*d*<sub>6</sub>) δ 169.1, 166.2, 162.1, 156.0, 139.0, 137.0, 134.2, 130.6, 129.9, 129.4, 129.1, 128.8, 128.6, 128.2, 127.6, 124.8, 124.7, 123.3, 122.0, 121.4, 121.0, 113.5, 112.7, 77.0, 63.0, 55.4. HRMS (ESI-TOF) *m/z* [M + Na]<sup>+</sup> Calcd for C<sub>32</sub>H<sub>24</sub>ClN<sub>3</sub>O<sub>5</sub>Na<sup>+</sup> 588.1297; found 588.1305.

**Ethyl *N*-(2-(benzyloxy)-4-(2-methylbenzyl)-1,3-dioxo-2,3,4,9-tetrahydro-1*H*-pyrido[3,4-*b*]indol-4-yl)-4-methoxybenzamide (3n)**

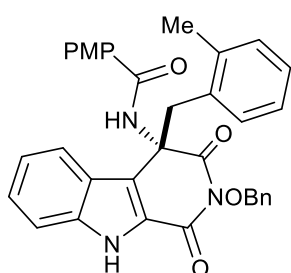

The residue was purified by flash chromatography (PE/EA = 5/1) giving the product **3n** as a white solid in 95% yield (53.0 mg), m. p. 247.6 – 248.3 °C. <sup>1</sup>H NMR (600 MHz, DMSO-*d*<sub>6</sub>) δ 12.18 (s, 1H), 9.81 (s, 1H), 8.05 (d, *J* = 8.4 Hz, 1H), 7.93 (d, *J* = 9.0 Hz, 2H), 7.51 (t, *J* = 9.0 Hz, 3H), 7.43 – 7.39 (m, 3H), 7.35 (t, *J* = 8.4 Hz, 1H), 7.16 (t, *J* = 7.8 Hz, 1H), 7.04 – 7.01 (m, 3H), 6.98 (d, *J* = 7.8 Hz, 1H), 6.84 (t, *J* = 7.8 Hz, 1H), 6.25 (d, *J* = 7.8 Hz, 1H), 4.62 (d, *J* = 40.8 Hz, 2H), 3.82 (s, 3H), 3.76 (s, 1H), 1.88 (s, 3H). <sup>13</sup>C NMR (150 MHz, DMSO-*d*<sub>6</sub>) δ 170.5, 165.4, 162.1, 155.8, 138.5, 137.3, 134.4, 131.6, 130.3, 130.1, 129.7, 129.2, 128.8, 128.4, 127.3, 125.8, 125.1, 125.0, 123.6, 123.2, 121.2, 120.83, 120.79, 113.6, 113.4, 77.2, 61.4, 55.4, 40.9, 19.0. HRMS (ESI-TOF) *m/z* [M + Na]<sup>+</sup> Calcd for C<sub>34</sub>H<sub>29</sub>N<sub>3</sub>O<sub>5</sub>Na<sup>+</sup> 582.1999; found 582.2008.

**Ethyl *N*-(2-(benzyloxy)-4-(4-methylbenzyl)-1,3-dioxo-2,3,4,9-tetrahydro-1*H*-pyrido[3,4-*b*]indol-4-yl)-4-methoxybenzamide (3o)**

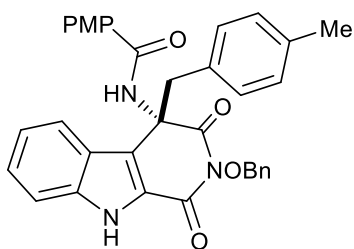

The residue was purified by flash chromatography (PE/EA = 5/1) giving the product **3o** as a white solid in 71% yield (40.0 mg), m. p. 230.2 – 231.0 °C. <sup>1</sup>H NMR (600 MHz, DMSO-*d*<sub>6</sub>) δ 12.11 (s, 1H), 9.77 (s, 1H), 8.11 (d, *J* = 7.8 Hz, 1H), 7.91 (d, *J* = 8.4 Hz, 2H), 7.52 (t, *J* = 4.8 Hz, 3H), 7.44 – 7.40 (m, 3H), 7.36 (t, *J* = 7.2 Hz, 1H), 7.20 (t, *J* = 7.8 Hz, 1H), 7.02 (d, *J* = 9.0 Hz, 2H), 6.85 (d, *J* = 7.8 Hz, 2H), 6.37 (d, *J* = 7.8 Hz, 2H), 4.84 (d, *J* = 9.6 Hz, 1H), 4.66 (s, 1H), 3.81 (s, 3H), 3.79 (s, 1H), 3.55 (d, *J* = 13.2 Hz, 1H), 2.13 (s, 3H). <sup>13</sup>C NMR (150 MHz, DMSO-*d*<sub>6</sub>) δ 170.2, 165.5, 162.1, 155.7, 138.5, 136.4, 134.5, 129.9, 129.6, 129.4, 129.3, 128.8, 128.42, 128.36, 125.7, 124.9, 123.8, 122.9, 120.9, 120.8, 120.6, 113.6, 113.4, 77.3, 61.4, 55.4, 44.3, 20.5. HRMS (ESI-TOF) *m/z* [M + Na]<sup>+</sup> Calcd for C<sub>34</sub>H<sub>29</sub>N<sub>3</sub>O<sub>5</sub>Na<sup>+</sup> 582.1999; found 582.1997.

**Ethyl *N*-(2-(benzyloxy)-4-(4-methoxybenzyl)-1,3-dioxo-2,3,4,9-tetrahydro-1*H*-pyrido[3,4-*b*]indol-4-yl)-4-methoxybenzamide (3p)**

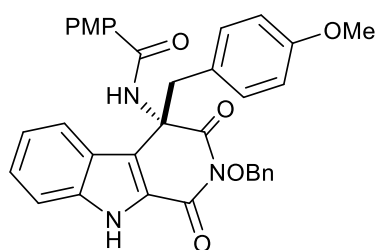

The residue was purified by flash chromatography (PE/EA = 5/1) giving the product **3p** as a white solid in 83% yield (48.0 mg), m. p. 133.2 – 134.0 °C. <sup>1</sup>H NMR (600 MHz, DMSO-*d*<sub>6</sub>) δ 12.12 (s, 1H), 9.76 (s, 1H), 8.10 (d, *J* = 7.8 Hz, 1H), 7.91 – 7.89 (m, 2H),

7.54 – 7.51 (m, 3H), 7.44 – 7.39 (m, 3H), 7.38 – 7.35 (m, 1H), 7.21 – 7.19 (m, 1H), 7.03 – 7.00 (m, 2H), 6.61 (d, *J* = 9.0 Hz, 2H), 6.38 (d, *J* = 8.4 Hz, 2H), 4.84 (d, *J* = 9.6 Hz, 1H), 4.67 (s, 1H), 3.81 (s, 3H), 3.77 (d, *J* = 12.6 Hz, 1H), 3.59 (s, 3H), 3.53 (d, *J* = 12.6 Hz, 1H). <sup>13</sup>C NMR (150 MHz, DMSO-*d*<sub>6</sub>) δ 170.3, 165.5, 162.1, 158.4, 155.8, 138.6, 134.5, 130.6, 129.6, 129.3, 128.8, 128.4, 125.8, 125.0, 124.8, 123.8, 122.9, 120.9, 120.8, 120.7, 113.6, 113.5, 113.3, 77.3, 61.6, 55.4, 54.9, 43.9. HRMS (ESI-TOF) *m/z* [M + Na]<sup>+</sup> Calcd for C<sub>34</sub>H<sub>29</sub>N<sub>3</sub>O<sub>6</sub>Na<sup>+</sup> 598.1949; found 598.1949.

**Ethyl *N*-(2-(benzyloxy)-4-(2-chlorobenzyl)-1,3-dioxo-2,3,4,9-tetrahydro-1*H*-pyrido[3,4-*b*]indol-4-yl)-4-methoxybenzamide (3q)**

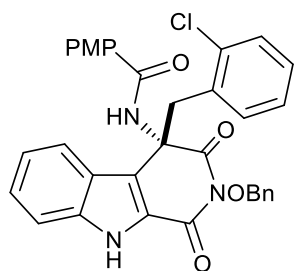

The residue was purified by flash chromatography (PE/EA = 5/1) giving the product **3q** as a white solid in 90% yield (52.0 mg), m. p. 240.0 – 241.0 °C. <sup>1</sup>H NMR (600 MHz, DMSO-*d*<sub>6</sub>) δ 12.17 (s, 1H), 9.86 (s, 1H), 7.94 (s, 3H), 7.55 – 7.32 (m, 7H), 7.21 – 7.05 (m, 6H), 6.65 (s, 1H), 4.79 (d, *J* = 89.4 Hz, 2H),

3.90 (d, *J* = 32.4 Hz, 2H), 3.82 (s, 3H). <sup>13</sup>C NMR (150 MHz, DMSO-*d*<sub>6</sub>) δ 170.0, 165.5, 162.1, 155.8, 138.6, 134.4, 131.9, 131.1, 129.7, 129.4, 129.32, 129.26, 128.9, 128.4, 126.5, 125.7, 124.9, 123.6, 123.3, 121.0, 120.9, 120.6, 113.6, 113.2, 77.3, 61.3, 55.4, 40.9. HRMS (ESI-TOF) *m/z* [M + Na]<sup>+</sup> Calcd for C<sub>33</sub>H<sub>26</sub>ClN<sub>3</sub>O<sub>5</sub>Na<sup>+</sup> 602.1453; found 602.1450.

**Ethyl *N*-(2-(benzyloxy)-4-(3-bromobenzyl)-1,3-dioxo-2,3,4,9-tetrahydro-1*H*-pyrido[3,4-*b*]indol-4-yl)-4-methoxybenzamide (3r)**

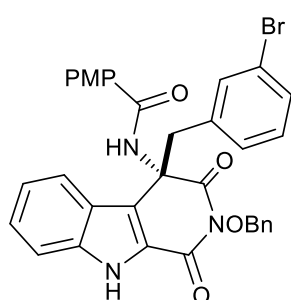

The residue was purified by flash chromatography (PE/EA = 5/1) giving the product **3r** as a white solid in 58% yield (36.0 mg), m. p. 170.1 – 171.0 °C. <sup>1</sup>H NMR (600 MHz, DMSO-*d*<sub>6</sub>) δ 12.22 (s, 1H), 9.84 (s, 1H), 8.09 (d, *J* = 7.8 Hz, 1H), 7.91 (d, *J* = 9.0 Hz, 2H), 7.54 (d, *J* = 7.8 Hz, 3H), 7.45 – 7.41 (m, 3H), 7.39 – 7.34 (m, 2H), 7.21 (t, *J* = 7.2 Hz, 1H), 7.04 – 7.00 (m, 3H), 6.73 (s, 1H), 6.39 (d, *J* = 7.8 Hz, 1H), 4.86 (d, *J* = 9.0 Hz, 1H), 4.61 (d, *J* = 7.2 Hz, 1H), 3.83 (d, *J* = 13.2 Hz, 1H), 3.81 (s, 3H), 3.59 (d, *J* = 12.6 Hz, 1H). <sup>13</sup>C NMR (150 MHz, DMSO-*d*<sub>6</sub>) δ 170.0, 165.5, 162.1, 155.6, 138.6, 135.8, 134.4, 132.5, 130.2, 130.0, 129.6, 129.1, 128.8, 128.6, 128.4, 125.9, 124.8, 123.7, 122.8, 121.04, 120.97, 120.8, 120.3, 113.6, 113.5, 77.5, 61.2, 55.4, 44.1. HRMS (ESI-TOF) *m/z* [M + Na]<sup>+</sup> Calcd for C<sub>33</sub>H<sub>26</sub>BrN<sub>3</sub>O<sub>5</sub>Na<sup>+</sup> 646.0948; found 646.0949.

**Ethyl *N*-(2-(benzyloxy)-4-(4-chlorobenzyl)-1,3-dioxo-2,3,4,9-tetrahydro-1*H*-pyrido[3,4-*b*]indol-4-yl)-4-methoxybenzamide (3s)**

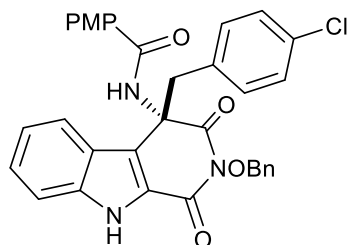

The residue was purified by flash chromatography (PE/EA = 5/1) giving the product **3s** as a white solid in 83% yield (48.0 mg), m. p. 163.2 – 164.2 °C. <sup>1</sup>H NMR (600 MHz, DMSO-*d*<sub>6</sub>) δ 12.18 (s, 1H), 9.82 (s, 1H), 8.09 (d, *J* = 7.8 Hz, 1H), 7.91 (d, *J* = 9.0 Hz, 2H), 7.53 (t, *J* = 7.2 Hz, 3H), 7.43 – 7.40 (m, 3H), 7.37 (t, *J* = 7.2, 1H), 7.20 (t, *J* = 7.2 Hz, 1H), 7.14 (d, *J* = 7.8 Hz, 2H), 7.03 (d, *J* = 8.4 Hz, 2H), 6.49 (d, *J* = 7.8 Hz, 2H), 4.88 (d, *J* = 9.6 Hz, 1H), 4.70 (d, *J* = 9.6 Hz, 1H), 3.83 (s, 1H), 3.81 (s, 3H), 3.59 (d, *J* = 12.6 Hz, 1H). <sup>13</sup>C NMR (150 MHz, DMSO-*d*<sub>6</sub>) δ 170.1, 165.5, 162.1, 155.6, 138.6, 134.4, 132.2, 132.1, 131.3, 129.6, 129.4, 128.9, 128.4, 127.9, 125.9, 124.9, 123.7, 122.8, 120.9, 120.8, 120.3, 113.6, 113.5, 77.3, 61.3, 55.4, 43.9. HRMS (ESI-TOF) *m/z* [M + Na]<sup>+</sup> Calcd for C<sub>33</sub>H<sub>26</sub>ClN<sub>3</sub>O<sub>5</sub>Na<sup>+</sup> 602.1453; found 602.1460.



**Ethyl *N*-(2-(benzyloxy)-4-(4-nitrobenzyl)-1,3-dioxo-2,3,4,9-tetrahydro-1*H*-pyrido[3,4-*b*]indol-4-yl)-4-methoxybenzamide (3t)**

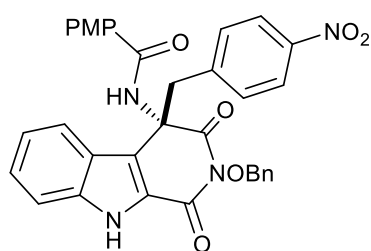

The residue was purified by flash chromatography (PE/EA = 5/1) giving the product **3t** as a yellow solid in 54% yield (32.0 mg), m. p. 164.0 – 165.0 °C. <sup>1</sup>H NMR (600 MHz, DMSO-*d*<sub>6</sub>) δ 12.21 (s, 1H), 9.89 (s, 1H), 8.10 (d, *J* = 7.8 Hz, 1H), 7.96 (d, *J* = 8.4 Hz, 2H), 7.91 (d, *J* = 8.4 Hz, 2H), 7.54 – 7.52 (m, 3H), 7.44 – 7.37 (m, 4H), 7.21 (t, *J* = 7.8 Hz, 1H), 7.03 (d, *J* = 9.0 Hz, 2H), 6.78 (d, *J* = 8.4 Hz, 2H), 4.90 (d, *J* = 9.6 Hz, 1H), 4.73 (d, *J* = 8.4 Hz, 1H), 3.96 (d, *J* = 12.6 Hz, 1H), 3.81 (s, 3H), 3.73 (d, *J* = 12.6 Hz, 1H). <sup>13</sup>C NMR (150 MHz, DMSO-*d*<sub>6</sub>) δ 169.9, 165.6, 162.2, 155.5, 146.8, 141.1, 138.6, 134.4, 131.0, 129.6, 129.4, 128.8, 128.3, 126.0, 124.8, 123.5, 122.9, 122.8, 121.0, 120.8, 119.9, 113.64, 113.55, 77.3, 61.1, 55.4, 44.1. HRMS (ESI-TOF) *m/z* [M + Na]<sup>+</sup> Calcd for C<sub>33</sub>H<sub>26</sub>N<sub>4</sub>O<sub>7</sub>Na<sup>+</sup> 613.1694; found 613.1690.

**Ethyl *N*-(2-(benzyloxy)-4-(naphthalen-2-ylmethyl)-1,3-dioxo-2,3,4,9-tetrahydro-1*H*-pyrido[3,4-*b*]indol-4-yl)-4-methoxybenzamide (3u)**

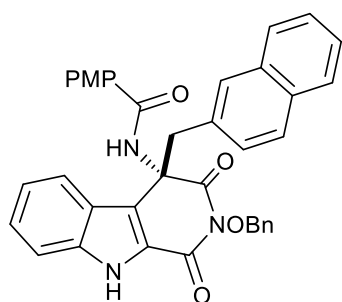

The residue was purified by flash chromatography (PE/EA = 5/1) giving the product **3u** as a yellow solid in 50% yield (30.0 mg), m. p. 188.0 – 192.5 °C. <sup>1</sup>H NMR (600 MHz, DMSO-*d*<sub>6</sub>) δ 12.10 (s, 1H), 9.88 (s, 1H), 8.18 (d, *J* = 8.4 Hz, 1H), 7.93 (d, *J* = 9.0 Hz, 2H), 7.87 – 7.82 (m, 1H), 7.51 (d, *J* = 7.2 Hz, 1H), 7.61 (d, *J* = 7.8 Hz, 1H), 7.55 – 7.52 (m, 2H), 7.41 – 7.36 (m, 7H), 7.25 (t, *J* = 7.2 Hz, 2H), 7.04 (d, *J* = 8.4 Hz, 2H), 6.35 (d, *J* = 10.2 Hz, 1H), 4.76 (d, *J* = 9.6 Hz, 1H), 4.01 (d, *J* = 12.6 Hz, 1H), 3.83 (d, *J* = 6.0 Hz, 3H), 3.79 – 3.76 (m, 2H). <sup>13</sup>C NMR (150 MHz, DMSO-*d*<sub>6</sub>) δ 170.2, 165.5, 162.1, 155.5, 138.6, 134.4, 132.3, 131.9, 130.8, 129.6, 129.0, 128.7, 128.3, 127.4, 127.3, 127.2, 127.1, 126.2, 126.0, 125.9, 124.9, 123.7, 123.0, 120.95, 120.90, 120.7, 113.6, 113.5, 77.2, 61.6, 55.4, 44.9. HRMS (ESI-TOF) *m/z* [M + Na]<sup>+</sup> Calcd for C<sub>37</sub>H<sub>29</sub>N<sub>3</sub>O<sub>5</sub>Na<sup>+</sup> 618.1999; found 618.1993.f

**Ethyl *N*-(2-(benzyloxy)-4-isopropyl-1,3-dioxo-2,3,4,9-tetrahydro-1*H*-pyrido[3,4-*b*]indol-4-yl)-4-methoxybenzamide (3v)**

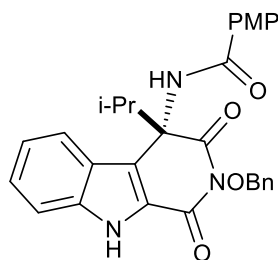

The residue was purified by flash chromatography (PE/EA = 5/1) giving the product **3v** as a white solid in 52% yield (26.0 mg), m. p. 196.5 – 197.3 °C. <sup>1</sup>H NMR (600 MHz, DMSO-*d*<sub>6</sub>) δ 12.28 (s, 1H), 9.37 (s, 1H), 7.96 (d, *J* = 7.8 Hz, 1H), 7.86 (d, *J* = 9.0 Hz, 2H), 7.61 (d, *J* = 6.0 Hz, 2H), 7.48 (d, *J* = 8.4 Hz, 1H), 7.45 – 7.39 (m, 3H), 7.28 (t, *J* = 8.4 Hz, 1H), 7.06 (t, *J* = 7.8 Hz, 1H), 7.00 (d, *J* = 9.0 Hz, 2H), 5.09 (dd, *J* = 24.6, 9.6 Hz, 2H), 3.80 (s, 3H), 2.78 (quin, *J* = 6.6 Hz, 1H), 1.09 (d, *J* = 6.6 Hz, 3H), 0.77 (d, *J* = 6.6 Hz, 3H). <sup>13</sup>C NMR (150 MHz, DMSO-*d*<sub>6</sub>) δ 169.3, 166.0, 162.0, 156.5, 138.6, 134.7, 129.7, 129.3, 128.8, 128.3, 125.5, 125.2, 123.7, 123.0, 121.8, 121.6, 120.3, 113.5, 113.2, 77.3, 64.2, 55.4, 36.3, 17.7, 16.7. HRMS (ESI-TOF) *m/z* [M + Na]<sup>+</sup> Calcd for C<sub>29</sub>H<sub>27</sub>N<sub>3</sub>O<sub>5</sub>Na<sup>+</sup> 520.1843; found 520.1834.

**Ethyl *N*-(2-(benzyloxy)-4-cyclohexyl-1,3-dioxo-2,3,4,9-tetrahydro-1*H*-pyrido[3,4-*b*]indol-4-yl)-4-methoxybenzamide (3w)**

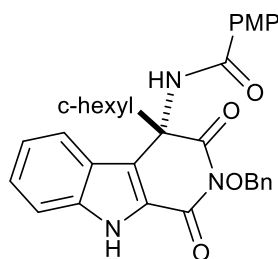

The residue was purified by flash chromatography (PE/EA = 5/1) giving the product **3w** as a white solid in 37% yield (20.0 mg), m. p. 279.8 – 280.3 °C. <sup>1</sup>H NMR (600 MHz, DMSO-*d*<sub>6</sub>) δ 12.27 (s, 1H), 9.35 (s, 1H), 7.93 (d, *J* = 8.4 Hz, 1H), 7.85 (d, *J* = 8.4 Hz, 2H), 7.61 (d, *J* = 6.0 Hz, 2H), 7.47 (d, *J* = 8.4 Hz, 1H), 7.45 – 7.39 (m, 3H), 7.28 (t, *J* = 8.4 Hz, 1H), 7.06 (t, *J* = 7.8 Hz, 1H), 7.00 (d, *J* = 9.0 Hz, 2H), 5.10 (dd, *J* = 26.4, 9.6 Hz, 2H), 3.81 (s, 3H), 2.39 (t, *J* = 12.0 Hz, 1H), 1.99 (d, *J* = 12.6 Hz, 1H), 1.73 (d, *J* = 12.6 Hz, 1H), 1.60 (t, *J* = 11.4 Hz, 2H), 1.53 (d, *J* = 12.0 Hz, 1H), 1.27 – 1.20 (m, 1H), 1.09 – 1.01 (m, 2H), 0.98 – 0.91 (m, 1H), 0.83 – 0.76 (m, 1H). <sup>13</sup>C NMR (150 MHz, DMSO-*d*<sub>6</sub>) δ 169.8, 166.1, 162.0, 156.6, 138.6, 134.7, 129.7, 129.4, 128.8, 128.3, 125.5, 125.3, 123.6, 123.1, 121.8, 121.6, 120.4, 113.5, 113.1, 77.3, 64.3, 55.4, 46.1, 27.5, 26.2, 26.0, 25.8, 25.5. HRMS (ESI-TOF) *m/z* [M + Na]<sup>+</sup> Calcd for C<sub>32</sub>H<sub>31</sub>N<sub>3</sub>O<sub>5</sub>Na<sup>+</sup> 560.2156; found 560.2164.

**Ethyl**      ***N*-(1,3-dioxo-2-phenoxy-4-phenyl-2,3,4,9-tetrahydro-1*H*-pyrido[3,4-*b*]indol-4-yl)-4-methoxybenzamide (3x)**

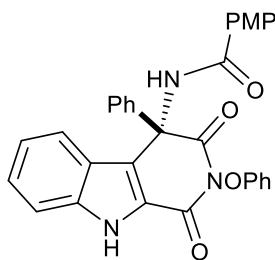

The residue was purified by flash chromatography (PE/EA = 5/1) giving the product **3x** as a white solid in 97% yield (51.0 mg), m. p. 220.1 – 221.0 °C. <sup>1</sup>H NMR (600 MHz, DMSO-*d*<sub>6</sub>) δ 12.60 (s, 1H), 10.08 (s, 1H), 7.97 (d, *J* = 9.0 Hz, 2H), 7.83 (d, *J* = 8.4 Hz, 1H), 7.56 (d, *J* = 8.4 Hz, 1H), 7.44 – 7.38 (m, 6H), 7.34 (t, *J* = 8.4 Hz, 2H), 7.26 (s, 2H), 7.05 (t, *J* = 7.8 Hz, 2H), 6.99 (d, *J* = 9.0 Hz, 2H), 3.80 (s, 3H). <sup>13</sup>C NMR (150 MHz, DMSO-*d*<sub>6</sub>) δ 168.9, 166.2, 162.1, 158.3, 139.0, 137.1, 129.9, 129.5, 129.2, 128.7, 127.7, 126.2, 124.7, 123.3, 123.2, 121.8, 121.6, 120.9, 113.5, 113.4, 112.4, 63.6, 55.4. HRMS (ESI-TOF) *m/z* [M + Na]<sup>+</sup> Calcd for C<sub>31</sub>H<sub>23</sub>N<sub>3</sub>O<sub>5</sub>Na<sup>+</sup> 540.1530; found 540.1534.

**Ethyl**      ***N*-(4-benzyl-2-methoxy-1,3-dioxo-2,3,4,9-tetrahydro-1*H*-pyrido[3,4-*b*]indol-4-yl)-4-methoxybenzamide (3y)**

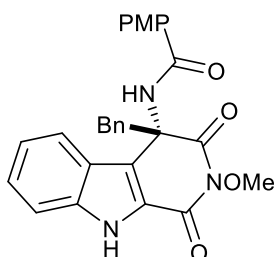

The residue was purified by flash chromatography (PE/EA = 5/1) giving the product **3y** as a white solid in 83% yield (39.0 mg), m. p. 164.7 – 165.2 °C. <sup>1</sup>H NMR (600 MHz, DMSO-*d*<sub>6</sub>) δ 12.11 (s, 1H), 9.75 (s, 1H), 8.09 (d, *J* = 8.4 Hz, 1H), 7.90 (d, *J* = 8.4 Hz, 2H), 7.50 (d, *J* = 7.8 Hz, 1H), 7.35 (t, *J* = 7.8 Hz, 1H), 7.19 (t, *J* = 7.8 Hz, 1H), 7.12 (t, *J* = 7.8 Hz, 1H), 7.05 – 7.01 (m, 4H), 6.44 (d, *J* = 7.8 Hz, 2H), 3.81 (s, 3H), 3.79 (s, 1H), 3.59 (s, 3H), 3.55 (d, *J* = 12.6 Hz, 1H). <sup>13</sup>C NMR (150 MHz, DMSO-*d*<sub>6</sub>) δ 169.8, 165.4, 162.1, 155.4, 138.5, 132.9, 129.6, 129.5, 127.8, 127.3, 125.7, 124.9, 123.8, 122.9, 120.8, 120.5, 113.6, 113.4, 63.0, 61.3, 55.4, 44.7. HRMS (ESI-TOF) *m/z* [M + Na]<sup>+</sup> Calcd for C<sub>27</sub>H<sub>23</sub>N<sub>3</sub>O<sub>5</sub>Na<sup>+</sup> 492.1530; found 492.1539.

**Ethyl *N*-(4-benzyl-2-(benzyloxy)-9-methyl-1,3-dioxo-2,3,4,9-tetrahydro-1*H*-pyrido[3,4-*b*]indol-4-yl)-4-methoxybenzamide (3z)**

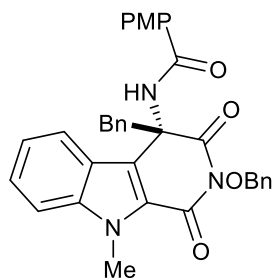

The residue was purified by flash chromatography (PE/EA = 5/1) giving the product **3z** as a white solid in 61% yield (28.0 mg), m. p. 147.2 – 148.0 °C. <sup>1</sup>H NMR (600 MHz, DMSO-*d*<sub>6</sub>) δ 9.82 (s, 1H), 8.15 (d, *J* = 7.8 Hz, 1H), 7.90 (d, *J* = 7.8 Hz, 2H), 7.71 (d, *J* = 9.0 Hz, 1H), 7.52 (d, *J* = 7.2 Hz, 2H), 7.47 – 7.41 (m, 4H), 7.26 (t, *J* = 7.8 Hz, 1H), 7.14 (t, *J* = 7.2 Hz, 1H), 7.07 – 7.02 (m, 4H), 6.46 (d, *J* = 7.2 Hz, 2H), 4.78 (d, *J* = 9.0 Hz, 1H), 4.56 (s, 1H), 4.01 (s, 3H), 3.80 (s, 3H), 3.80 (s, 1H), 3.58 (d, *J* = 12.6 Hz, 1H). <sup>13</sup>C NMR (150 MHz, DMSO-*d*<sub>6</sub>) δ 169.6, 165.4, 162.1, 155.9, 140.0, 134.4, 132.9, 129.61, 129.58, 129.3, 128.8, 128.4, 127.9, 127.5, 126.1, 124.8, 122.7, 122.0, 121.6, 121.2, 121.1, 113.6, 111.7, 77.2, 61.2, 55.4, 44.8, 31.2. HRMS (ESI-TOF) *m/z* [M + Na]<sup>+</sup> Calcd for C<sub>34</sub>H<sub>29</sub>N<sub>3</sub>O<sub>5</sub>Na<sup>+</sup> 582.1999; found 582.2000.

## 4. Scale-up reaction and transformations of product **3a**

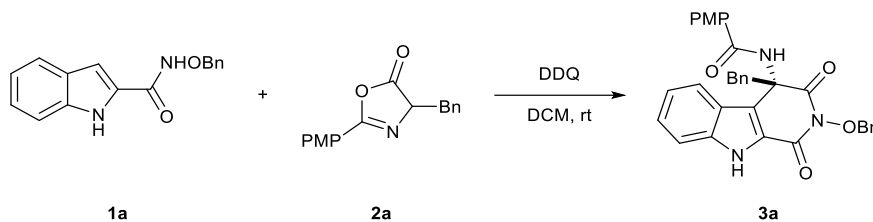

To a mixture of *N*-alkoxy indol-2-ylamides **1a** (266.1 mg, 1.0 mmol, 1.0 equiv), azolactones **2a** (562.2 mg, 2.0 mmol, 2.0 equiv) in DCM (20.0 mL) was added DDQ (454.0 mg, 2.0 mmol, 2.0 equiv) at room temperature for 12 h. After completed (monitored by TLC), the reaction mixture was purified by flash chromatography on silica gel (PE/EA = 5/1) to give the pure product **3a** (480.0 mg, 88% yield) as a white solid.

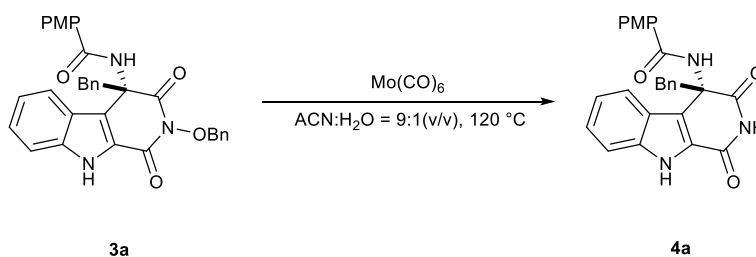

Compound **4a** was prepared by a modified reported procedure<sup>[3]</sup>. The corresponding compound **3a** (54.5 mg, 0.1 mmol, 1.0 equiv) was dissolved in acetonitrile/water (9:1 = v/v, 1mL),  $\text{Mo}(\text{CO})_6$  (29.0 mg, 0.1 mmol, 1.0 equiv) was added. The reaction was reflux at 120 °C for 12 h. After completed (monitored by TLC), the reaction mixture was cooled to room temperature. The reaction mixture was concentrated and purified by flash column chromatography on silica gel (petroleum ether/ethyl acetate = 1/1) to afford the pure product **4a** (42.0 mg, 95% yield) as a white solid.

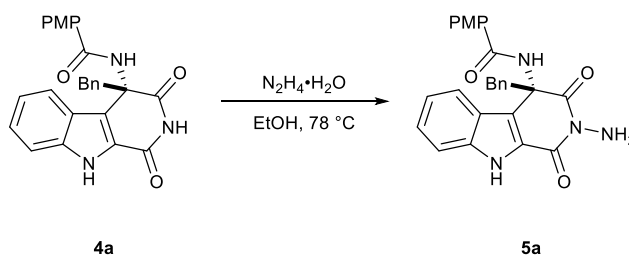

Compound **5a** was prepared by a modified reported procedure<sup>[4]</sup>. The corresponding

compound **4a** (43.9 mg, 0.1 mmol, 1.0 equiv) was dissolved in EtOH (20.0 mL) was added N<sub>2</sub>H<sub>4</sub>·H<sub>2</sub>O (10.0 mg, 0.2 mmol, 2.0 equiv) at 78 °C. After completed (monitored by TLC), cooled down the reaction to room temperature. The reaction mixture was concentrated and purified by flash column chromatography on silica gel (petroleum ether/ethyl acetate = 5/1) to afford the pure product **5a** (32.0 mg, 70% yield) as a white solid.

**Ethyl N-(4-benzyl-1,3-dioxo-2,3,4,9-tetrahydro-1H-pyrido[3,4-b]indol-4-yl)-4-methoxybenzamide (4a)**

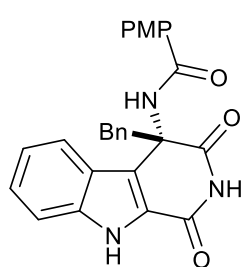

The residue was purified by flash chromatography (PE/EA = 1/1) giving the product **4a** as a white solid in 95% yield (42.0 mg), m. p. 316.2 – 317.0 °C. <sup>1</sup>H NMR (600 MHz, DMSO-*d*<sub>6</sub>) δ 11.86 (s, 1H), 10.89 (s, 1H), 9.52 (s, 1H), 8.05 (d, *J* = 7.8 Hz, 1H), 7.89 (d, *J* = 8.4 Hz, 2H), 7.46 (d, *J* = 8.4 Hz, 1H), 7.31 (t, *J* = 7.2 Hz, 1H), 7.15 (t, *J* = 7.8 Hz, 1H), 7.10 (t, *J* = 7.2 Hz, 1H), 7.02 (t, *J* = 7.2 Hz, 4H), 6.45 (d, *J* = 7.8 Hz, 2H), 3.81 (s, 3H), 3.73 (d, *J* = 12.6 Hz, 1H), 3.47 (d, *J* = 12.6 Hz, 1H). <sup>13</sup>C NMR (150 MHz, DMSO-*d*<sub>6</sub>) δ 174.6, 165.1, 161.9, 159.2, 138.2, 133.6, 129.5, 127.7, 127.0, 125.4, 125.3, 125.2, 123.2, 121.7, 120.7, 120.4, 113.5, 113.2, 60.7, 55.4, 44.7. HRMS (ESI-TOF) *m/z* [M + Na]<sup>+</sup> Calcd for C<sub>26</sub>H<sub>21</sub>N<sub>3</sub>O<sub>4</sub>Na<sup>+</sup> 462.1424; found 462.1431.

**Ethyl N-(2-amino-4-benzyl-1,3-dioxo-2,3,4,9-tetrahydro-1H-pyrido[3,4-b]indol-4-yl)-4-methoxybenzamide (5a)**

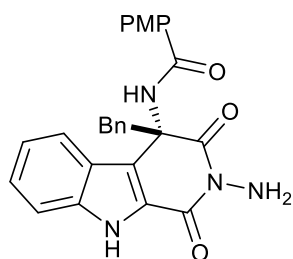

The residue was purified by flash chromatography (PE/EA = 5/1) giving the product **5a** as a white solid in 70% yield (32.0 mg), m. p. 285.0 – 285.8 °C. <sup>1</sup>H NMR (600 MHz, DMSO-*d*<sub>6</sub>) δ 11.91 (s, 1H), 9.62 (s, 1H), 8.02 (d, *J* = 7.8 Hz, 1H), 7.89 (d, *J* = 8.4 Hz, 2H), 7.45 (d, *J* = 8.4 Hz, 1H), 7.31 (t, *J* = 8.4 Hz, 1H), 7.15 (t, *J* = 8.4 Hz, 1H), 7.07 (t, *J* = 7.2 Hz, 1H), 7.02 (d, *J* = 8.4 Hz, 2H), 6.99 (d, *J* = 7.8 Hz, 2H), 6.40 (d, *J* = 7.2 Hz, 2H), 5.20 (s, 2H), 3.81 (s, 3H), 3.71 (d, *J* = 12.0 Hz, 1H), 3.51 (d, *J* = 12.6 Hz, 1H). <sup>13</sup>C NMR (150 MHz, DMSO-*d*<sub>6</sub>) δ 169.9, 166.9,

141.43, 141.40, 141.3, 136.8, 130.6, 128.1, 128.0, 127.9, 127.6, 127.1, 126.7, 126.2, 126.0, 125.9, 122.6, 115.0, 57.7, 46.2. HRMS (ESI-TOF)  $m/z$   $[M + Na]^+$  Calcd for  $C_{26}H_{22}N_4O_4Na^+$  477.1533; found 477.1539.

## 5. Control experiments

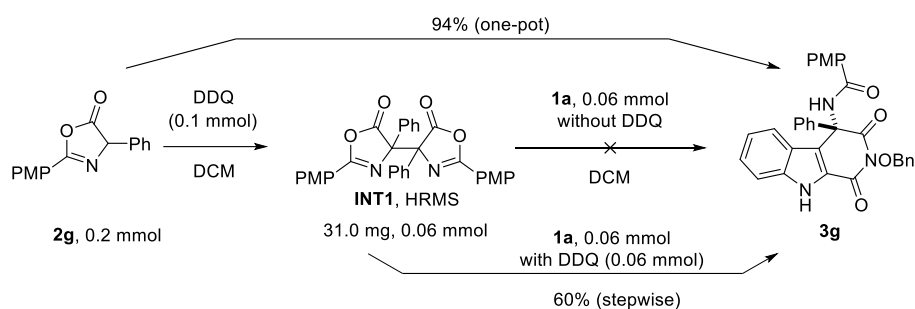

The mixture of **2g** (0.2 mmol), **1a** (0.1 mmol) in DCM (2.0 mL) was added DDQ (0.2 mmol) at room temperature for 12 h. After completed (monitored by TLC), the reaction mixture was purified by flash chromatography on silica gel (PE/EA = 5/1) to give the pure products **3g** (94% yield). Then, we attempted to inject the reaction using the stepwise method: the mixture of **2g** (0.2 mmol) in DCM (2.0 mL) was added DDQ (0.1 mmol) at room temperature for 12 h. After completed (monitored by TLC), the reaction mixture was purified by flash chromatography on silica gel (PE/EA = 25/1) to give the coupling product **INT1** (31.0 mg). The coupling product **INT1** (0.06 mmol) and **1a** (0.06 mmol) was added to the solution for 12 h, no product was detected in the progress at last. The coupling product **INT1** (0.06 mmol), **1a** (0.06 mmol) and DDQ (0.06 mmol) was added to the solution for 12 h. After completed (monitored by TLC), the reaction mixture was purified by flash chromatography on silica gel (PE/EA = 5/1) to give the pure products **3g** (60% yield).

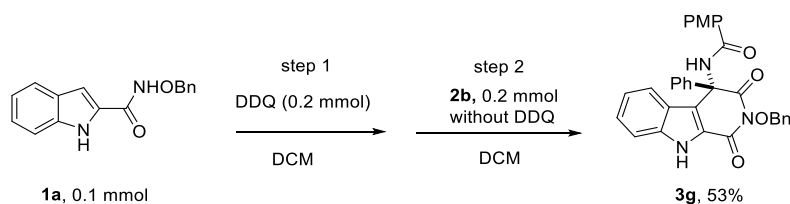

The mixture of **1a** (0.1 mmol) in DCM (2.0 mL) was added DDQ (0.2 mmol) at room temperature for 12 h, no product was detected in the progress at last. Then added **2b**

(0.2 mmol) without DDQ in the reaction for another 12 h. After completed (monitored by TLC), the reaction mixture was purified by flash chromatography on silica gel (PE/EA = 5/1) to give the pure products **3g** (53% yield).

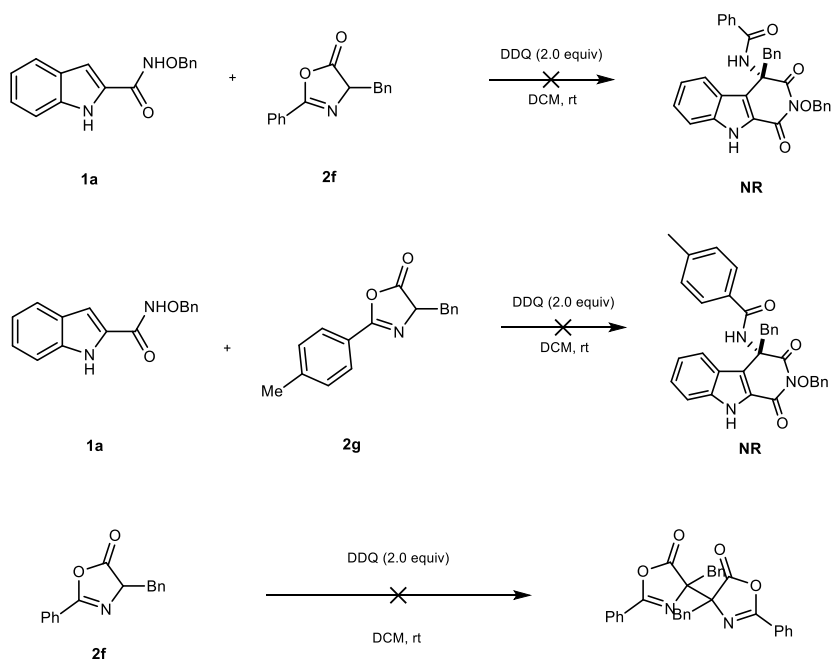

In order to investigate the impact of *p*-methoxyphenyl on azlactones, we conducted experiments where we replaced *p*-methoxyphenyl with either phenyl or *p*-methylphenyl. The results indicated that regardless of the substitution, the azlactones were degraded during the reaction, and no target products were formed. Additionally, we examined the phenyl-substituted azlactones under the presence of oxidant DDQ and observed that no dimeric intermediate was formed. Instead, it underwent destruction, leading to the formation of a polar point. As a result, we propose that the *p*-methoxyphenyl-substituted azlactones may influence the oxidation process of the reaction through electronic effects.



## 6. Single crystal X-ray diffraction analysis and crystal data

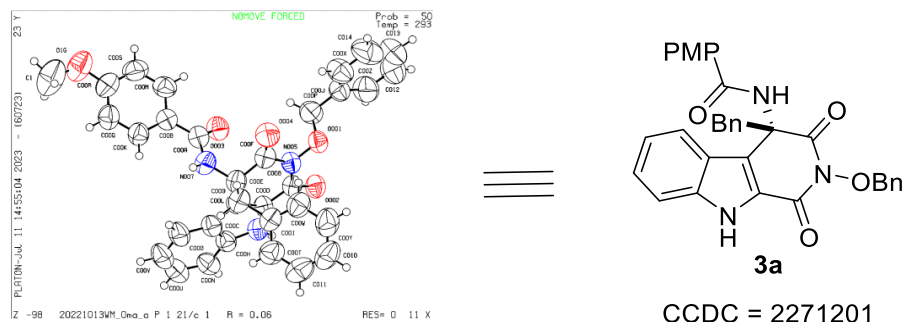

To a 5 mL tube containing **3a** (30 mg) was added a 1:3 mixture of dichloromethane and petroleum ether (4 mL). A clear solution was obtained through ultrasound treatment and was kept at room temperature for 3 day to get crystals of **3a**, which were characterized by single crystal X-ray diffraction. The data were collected by an Agilent Gemini. **3a** contains the supplementary crystallographic data for this paper. These data can be obtained free of charge via [www.ccdc.cam.ac.uk/data\\_request/cif](http://www.ccdc.cam.ac.uk/data_request/cif).

(Ellipsoid contour probability 50%)

|                                    |                                                               |
|------------------------------------|---------------------------------------------------------------|
| Empirical formula                  | C <sub>33</sub> H <sub>27</sub> N <sub>3</sub> O <sub>5</sub> |
| Formula weight                     | 545.57                                                        |
| Temperature/K                      | 293(2)                                                        |
| Crystal system                     | monoclinic                                                    |
| Space group                        | P2 <sub>1</sub> /c                                            |
| a/Å                                | 18.3523(6)                                                    |
| b/Å                                | 15.4661(6)                                                    |
| c/Å                                | 10.0487(3)                                                    |
| α/°                                | 90                                                            |
| β/°                                | 101.175(2)                                                    |
| γ/°                                | 90                                                            |
| Volume/Å <sup>3</sup>              | 2798.13(17)                                                   |
| Z                                  | 4                                                             |
| ρ <sub>calc</sub> /cm <sup>3</sup> | 1.295                                                         |

---

|                                                |                                                                    |
|------------------------------------------------|--------------------------------------------------------------------|
| $\mu/\text{mm}^{-1}$                           | 0.718                                                              |
| F(000)                                         | 1144.0                                                             |
| Radiation                                      | CuK $\alpha$ ( $\lambda = 1.54178$ )                               |
| 2 $\Theta$ range for data collection/ $^\circ$ | 4.908 to 137.612                                                   |
| Index ranges                                   | $-22 \leq h \leq 22$ , $-14 \leq k \leq 18$ , $-12 \leq l \leq 12$ |
| Reflections collected                          | 32786                                                              |
| Independent reflections                        | 5117 [Rint = 0.0840, Rsigma = 0.0441]                              |
| Data/restraints/parameters                     | 5117/1/375                                                         |
| Goodness-of-fit on $F^2$                       | 1.131                                                              |
| Final R indexes [ $I \geq 2\sigma(I)$ ]        | R1 = 0.0575, wR2 = 0.1433                                          |
| Final R indexes [all data]                     | R1 = 0.1077, wR2 = 0.1782                                          |
| Largest diff. peak/hole / $e \text{ \AA}^{-3}$ | 0.33/-0.19                                                         |

## 7. DFT calculations

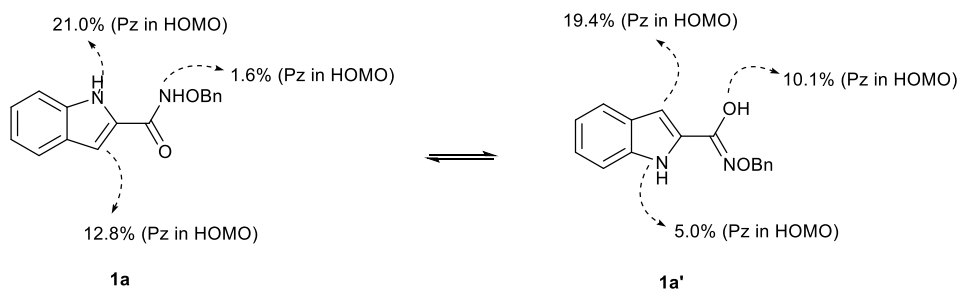

### A. Corresponding contribution of 2p<sub>z</sub> to HOMO

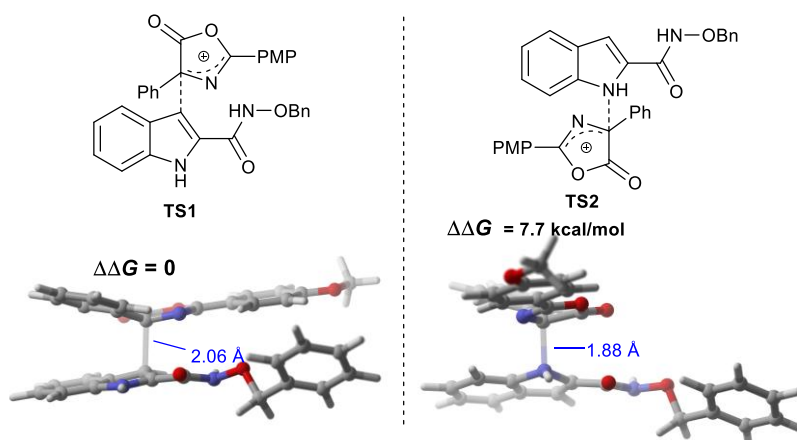

### B. Chemoselectivity Investigation

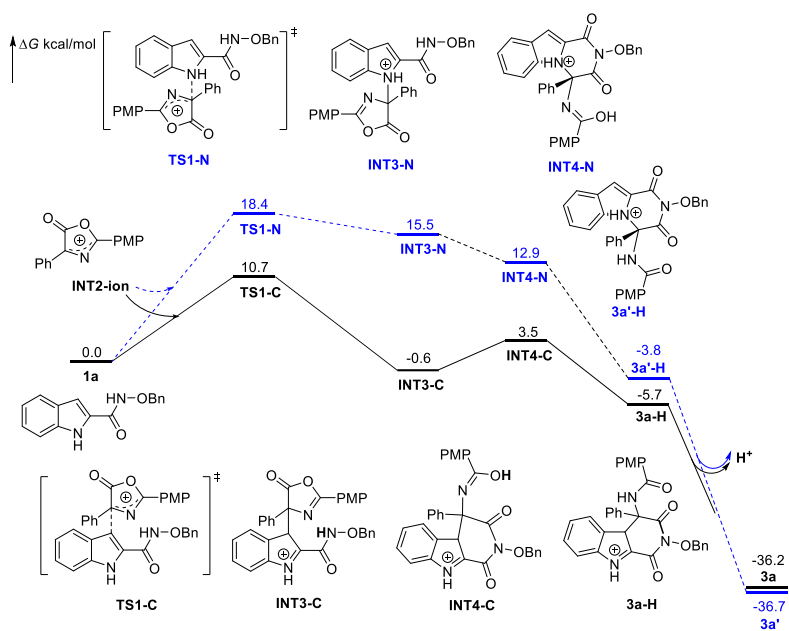

## 1) Computational Details

In this work, all geometry optimizations and single-point energy calculations were carried out using Gaussian 09.<sup>1</sup> Geometries of minima and transition states were optimized using the M06-2X functional<sup>2</sup> with basis set 6-31G(d) in gas phase. Vibrational frequency calculations were performed for all the stationary points to confirm if each optimized structure is a local minimum or a transition state structure, as well as deriving the thermochemical corrections for the enthalpies and free energies. Solvation energy corrections were calculated in DCM with the continuum solvation model (SMD)<sup>3</sup> based on the gas-phase optimized geometries. To gain more accurate results, the M06-2X functional<sup>4</sup> with basis set 6-311++G(d,p) was used for solvation single-point energy calculations. The integration grids defined by the 'Int=Ultrafine' keyword were used for all calculations.

## 2) Absolute Calculation Energies, Enthalpies, and Free Energies

| Geometry        | $E_{(\text{elec-M06-2X})}^1$ | $G_{(\text{corr-M06-2X})}^2$ | $H_{(\text{corr-M06-2X})}^3$ | $E_{(\text{solv, M06-2X})}^4$ | IF <sup>5</sup> |
|-----------------|------------------------------|------------------------------|------------------------------|-------------------------------|-----------------|
| <b>1a</b>       | -877.669638                  | 0.227631                     | 0.291562                     | -877.952347                   | -               |
| <b>1a'</b>      | -877.662470                  | 0.226524                     | 0.291283                     | -                             | -               |
| <b>TS-C</b>     | -1774.420730                 | 0.457927                     | 0.559982                     | -1775.007233                  | 296.91i         |
| <b>TS-N</b>     | -1774.406692                 | 0.457358                     | 0.560144                     | -1774.994448                  | 280.10i         |
| <b>INT3-C</b>   | -1774.438099                 | 0.459758                     | 0.562060                     | -1775.027075                  | -               |
| <b>INT3-N</b>   | -1774.410497                 | 0.457816                     | 0.562008                     | -1774.999469                  | -               |
| <b>INT2-ion</b> | -896.730121                  | 0.205716                     | 0.267381                     | -897.047390                   |                 |
| <b>INT4-C</b>   | -1773.909736                 | 0.45818                      | 0.561019                     | -1775.01899                   |                 |
| <b>INT4-N</b>   | -1773.898961                 | 0.459364                     | 0.561357                     | -1775.00519                   |                 |
| <b>3a-H</b>     | -1773.919715                 | 0.459232                     | 0.561597                     | -1775.03469                   |                 |
| <b>3a'-H</b>    | -1773.928195                 | 0.457769                     | 0.56136                      | -1775.03019                   |                 |
| <b>DDQH</b>     | -1485.487026                 | 0.035346                     | 0.088652                     | -1486.326328                  |                 |
| <b>DDQH2</b>    | -1485.988483                 | 0.048591                     | 0.101794                     | -1486.326328                  |                 |
| <b>3a</b>       | -1773.586565                 | 0.446556                     | 0.549322                     | -1774.6369                    |                 |
| <b>3a'</b>      | -1773.596399                 | 0.448095                     | 0.549073                     | -1774.63917                   |                 |

<sup>1</sup>The electronic energy calculated by M06-2X in gas phase. <sup>2</sup>The thermal correction to Gibbs free energy calculated by M06-2X in gas phase. <sup>3</sup>The thermal correction to enthalpy calculated by M06-2X in gas phase. <sup>4</sup>The electronic energy calculated by

---

M06-2X in DCM solvent. <sup>5</sup>The M06-2X calculated imaginary frequencies for the transition states.

### 3) Geometries for All Optimized Structures

|           |             |             |             |             |             |             |             |
|-----------|-------------|-------------|-------------|-------------|-------------|-------------|-------------|
| <b>1a</b> |             |             | H           | -2.26452300 | -2.23393900 | -0.34817100 |             |
| C         | -6.26233300 | -0.44186500 | -0.06342000 | H           | 0.05908900  | -1.84841500 | -0.86749600 |
| C         | -6.12374900 | 0.94767000  | 0.15290200  | H           | 5.15699400  | -2.05880300 | 0.78105300  |
| C         | -4.88182400 | 1.54483200  | 0.23801100  | H           | 7.28117900  | -0.87619000 | 0.29107200  |
| C         | -3.75947300 | 0.71617300  | 0.10119000  | H           | 7.23591400  | 1.47442500  | -0.49753700 |
| C         | -3.87485400 | -0.68106200 | -0.11829600 | H           | 5.06533100  | 2.64085900  | -0.78865800 |
| C         | -5.15678400 | -1.25628000 | -0.19861200 | H           | 2.93495500  | 1.44488800  | -0.27827500 |
| N         | -2.42580800 | 1.01566600  | 0.14112000  | H           | 2.76149100  | -2.09974700 | 0.88866000  |
| C         | -1.69509400 | -0.13204100 | -0.04544800 | H           | 2.09531700  | -0.52897900 | 1.41113700  |
| C         | -2.54482900 | -1.19909300 | -0.20808900 | <b>1a'</b>  |             |             |             |
| C         | -0.22622200 | 0.01193100  | -0.03749900 | C           | -6.29606900 | -0.82155900 | 0.23141200  |
| O         | 0.31001600  | 1.07615800  | 0.21518000  | C           | -6.35256500 | 0.54721100  | -0.10920100 |
| N         | 0.47666300  | -1.15494000 | -0.25747300 | C           | -5.20273100 | 1.28905000  | -0.30356600 |
| O         | 1.81001100  | -0.97292200 | -0.57945400 | C           | -3.97780000 | 0.62858800  | -0.14936000 |
| C         | 3.92072900  | -0.37145300 | 0.28860000  | C           | -3.89557300 | -0.74566000 | 0.19276200  |
| C         | 5.13977500  | -1.02559300 | 0.44361300  | C           | -5.08627600 | -1.47003000 | 0.38323700  |
| C         | 6.33369600  | -0.36128200 | 0.16645700  | N           | -2.69592200 | 1.09716000  | -0.27708300 |
| C         | 6.30731400  | 0.95688900  | -0.27729500 | C           | -1.81364400 | 0.06794200  | -0.02788500 |
| C         | 5.08647100  | 1.61255800  | -0.44123900 | C           | -2.50641400 | -1.07798200 | 0.26430000  |
| C         | 3.89670100  | 0.95323500  | -0.15731300 | C           | -0.38112300 | 0.32001000  | -0.10804600 |
| C         | 2.61736500  | -1.05049500 | 0.60214600  | O           | -0.05928000 | 1.59530500  | -0.39999800 |
| H         | -7.25753000 | -0.86989900 | -0.12331700 | N           | 0.46933300  | -0.61799200 | 0.09001600  |
| H         | -7.01498800 | 1.55851100  | 0.25473800  | O           | 1.75822100  | -0.08109500 | -0.02306300 |
| H         | -4.77583800 | 2.61187600  | 0.40470200  | C           | 4.07904000  | -0.53966100 | -0.00971900 |
| H         | -5.26890200 | -2.32335300 | -0.36470900 | C           | 5.06186100  | -0.89306200 | -0.93205000 |
| H         | -1.98602400 | 1.91303900  | 0.29121200  | C           | 6.34347500  | -0.35371300 | -0.84056400 |

---

|             |             |             |             |   |             |             |             |
|-------------|-------------|-------------|-------------|---|-------------|-------------|-------------|
| C           | 6.64541800  | 0.55413200  | 0.16952500  | N | 0.80708600  | -1.01741200 | -1.23793200 |
| C           | 5.66362000  | 0.91867100  | 1.09042100  | O | 2.03899000  | -1.33366500 | -0.71816800 |
| C           | 4.38845000  | 0.37179200  | 1.00330500  | C | 3.87633200  | -2.80061400 | -0.69040700 |
| C           | 2.70203300  | -1.14195800 | -0.08210800 | C | 5.16958600  | -2.56893400 | -1.15364500 |
| H           | -7.22211100 | -1.36867500 | 0.37509200  | C | 6.26688800  | -2.96000200 | -0.38885600 |
| H           | -7.31978400 | 1.02675900  | -0.22069400 | C | 6.07017700  | -3.57229700 | 0.84536000  |
| H           | -5.24583500 | 2.34157400  | -0.56551600 | C | 4.77638300  | -3.79703500 | 1.31675800  |
| H           | -5.04905700 | -2.52299400 | 0.64535300  | C | 3.68236600  | -3.41436200 | 0.55014600  |
| H           | -2.41053100 | 2.03565300  | -0.51263700 | C | 2.67721200  | -2.38114800 | -1.48638400 |
| H           | -2.06142400 | -2.03308000 | 0.50052900  | H | -6.68140300 | 1.08465000  | -2.12409400 |
| H           | 4.82285000  | -1.59339000 | -1.72810400 | H | -7.18225100 | -1.19941200 | -1.35497100 |
| H           | 7.10194800  | -0.63763000 | -1.56329700 | H | -5.35202800 | -2.75771400 | -0.69528700 |
| H           | 7.64175200  | 0.97912100  | 0.23965200  | H | -4.35001200 | 1.91754100  | -2.24724200 |
| H           | 5.89512800  | 1.62754100  | 1.87933400  | H | -2.49876800 | -2.83214700 | -0.43548600 |
| H           | 3.61942000  | 0.65175100  | 1.71756200  | H | -1.48608700 | 0.92995000  | -1.91462400 |
| H           | 2.56536800  | -1.70932300 | -1.01047700 | H | 0.74099700  | -0.03529200 | -1.48305100 |
| H           | 2.51291100  | -1.81578600 | 0.76214800  | H | 5.32013100  | -2.08789200 | -2.11653700 |
| H           | 0.91375000  | 1.62801000  | -0.45978000 | H | 7.27268400  | -2.78616400 | -0.75696600 |
| <b>TS-C</b> |             |             |             | H | 6.92435200  | -3.87803600 | 1.44085300  |
| C           | -5.86322500 | 0.43289200  | -1.83781300 | H | 4.62420000  | -4.27653100 | 2.27825600  |
| C           | -6.14997500 | -0.87027500 | -1.40136500 | H | 2.66832100  | -3.58369000 | 0.90379800  |
| C           | -5.13902900 | -1.75013400 | -1.03484700 | H | 2.94973500  | -1.98985500 | -2.47215500 |
| C           | -3.84136800 | -1.26317400 | -1.12465000 | H | 1.96103200  | -3.20100800 | -1.60052700 |
| C           | -3.52583100 | 0.03952600  | -1.55224800 | O | -0.86805400 | 2.95945100  | -0.06096400 |
| C           | -4.55717700 | 0.90587300  | -1.91755900 | C | 0.02250800  | 2.01543400  | 0.38161000  |
| N           | -2.63264500 | -1.89854600 | -0.82116000 | N | -0.50255900 | 0.88493100  | 0.75396400  |
| C           | -1.60267400 | -1.09923500 | -1.03218600 | C | -1.86478600 | 0.98121700  | 0.52353100  |
| C           | -2.08748000 | 0.20449600  | -1.37587200 | C | -2.12633400 | 2.40574800  | 0.05576700  |
| C           | -0.25361000 | -1.66955800 | -0.70003700 | O | -3.12498000 | 2.99341600  | -0.21499800 |
| O           | -0.19697000 | -2.70813600 | -0.07080000 | C | 1.41691600  | 2.34883500  | 0.34832100  |

---

|             |             |             |             |   |             |             |             |
|-------------|-------------|-------------|-------------|---|-------------|-------------|-------------|
| C           | 2.36495300  | 1.36279800  | 0.69928600  | C | 1.58928800  | -3.36036700 | -1.36633800 |
| C           | 3.70734300  | 1.65045500  | 0.64122500  | C | 2.52053500  | -4.31949100 | -1.75302500 |
| C           | 4.13705500  | 2.93516000  | 0.25077100  | N | 0.83548700  | -1.24636000 | -0.90336500 |
| C           | 3.19767900  | 3.92442900  | -0.09137400 | C | -0.23164500 | -2.18253100 | -0.67772100 |
| C           | 1.84784500  | 3.62591800  | -0.04435900 | C | 0.21529800  | -3.43889300 | -0.87791900 |
| O           | 5.45815900  | 3.11856800  | 0.23286000  | C | -1.55004500 | -1.52227700 | -0.47806500 |
| C           | 5.97002900  | 4.39309300  | -0.13171200 | O | -1.65471100 | -0.34443300 | -0.78678600 |
| H           | 2.02891500  | 0.37644200  | 1.00097300  | N | -2.56268700 | -2.31454100 | -0.05343800 |
| H           | 4.45747500  | 0.90841100  | 0.89079800  | O | -3.72361700 | -1.67786800 | 0.31473200  |
| H           | 3.51636700  | 4.91470000  | -0.39091900 | C | -5.70862500 | -0.63072200 | -0.41948400 |
| H           | 1.11807800  | 4.38376800  | -0.30948200 | C | -5.34647400 | 0.68543800  | -0.12046500 |
| H           | 7.05259000  | 4.30651400  | -0.06390700 | C | -6.32057400 | 1.61195400  | 0.23011400  |
| H           | 5.68364300  | 4.64882100  | -1.15692200 | C | -7.66194500 | 1.23108000  | 0.27703200  |
| H           | 5.61749000  | 5.16540800  | 0.55918000  | C | -8.02510200 | -0.07863700 | -0.02036100 |
| C           | -2.81410200 | 0.26324700  | 1.37581800  | C | -7.04704700 | -1.01053900 | -0.36251700 |
| C           | -2.37220700 | -0.87739200 | 2.06862200  | C | -4.63739400 | -1.60889800 | -0.80107800 |
| C           | -4.15481700 | 0.67126200  | 1.47789000  | H | 4.48331200  | -4.60561900 | -2.57074600 |
| C           | -3.26562000 | -1.60474600 | 2.84399400  | H | 4.99122100  | -2.20638100 | -2.77713800 |
| H           | -1.33133300 | -1.17905500 | 1.99283800  | H | 3.34110400  | -0.48124100 | -2.02781400 |
| C           | -5.03807900 | -0.06384500 | 2.25614900  | H | 2.29804200  | -5.37842500 | -1.67842800 |
| H           | -4.49666000 | 1.55494300  | 0.95150800  | H | 0.51032600  | -0.40647000 | -1.39503500 |
| C           | -4.59854300 | -1.20205500 | 2.93330300  | H | -0.36803400 | -4.34545100 | -0.77673700 |
| H           | -2.92198700 | -2.48040400 | 3.38418300  | H | -2.37011900 | -3.12763100 | 0.52076500  |
| H           | -6.07202700 | 0.25340000  | 2.33874400  | H | -4.29667100 | 0.96455700  | -0.15919000 |
| H           | -5.29427600 | -1.77069100 | 3.54205700  | H | -6.03858300 | 2.63347700  | 0.46442000  |
| <b>TS-N</b> |             |             |             | H | -8.42259500 | 1.95658100  | 0.54705400  |
| C           | 3.74427800  | -3.87783100 | -2.25387000 | H | -9.06734800 | -0.37783400 | 0.01879000  |
| C           | 4.03524600  | -2.51499900 | -2.36844000 | H | -7.32741100 | -2.03628400 | -0.58696700 |
| C           | 3.11874800  | -1.54088200 | -1.96660100 | H | -5.04407800 | -2.60624200 | -1.00239800 |
| C           | 1.91076700  | -2.00122000 | -1.47815400 | H | -4.07744200 | -1.26238300 | -1.67658800 |

---

|   |             |             |             |                 |             |             |             |
|---|-------------|-------------|-------------|-----------------|-------------|-------------|-------------|
| O | 0.22120100  | 1.34246300  | 1.20188400  | H               | 1.86522400  | -4.46523100 | 3.09632500  |
| C | 1.37783000  | 1.64129000  | 0.53164600  | H               | 4.32273500  | -4.51540800 | 2.78970700  |
| N | 2.14376900  | 0.62677400  | 0.23938700  | <b>INT2-ion</b> |             |             |             |
| C | 1.48934500  | -0.50635600 | 0.69581000  | O               | -0.06550500 | 1.76644500  | -0.00005900 |
| C | 0.20589600  | -0.01635300 | 1.38358600  | C               | 0.29743800  | 0.47408900  | -0.00000300 |
| O | -0.63262200 | -0.60098700 | 1.98858900  | N               | -0.73869500 | -0.40257900 | -0.00002500 |
| C | 1.62372000  | 3.02210500  | 0.24221300  | C               | -1.83819500 | 0.31315000  | -0.00007600 |
| C | 2.80879100  | 3.38816200  | -0.43075000 | C               | -1.46306100 | 1.78882500  | -0.00008900 |
| C | 3.05656600  | 4.70776700  | -0.71754200 | O               | -2.08873500 | 2.79217000  | -0.00013100 |
| C | 2.12665000  | 5.69900600  | -0.33802000 | C               | 1.65029400  | 0.12460300  | -0.00004200 |
| C | 0.94560000  | 5.34234200  | 0.33456200  | C               | 2.01861200  | -1.25212400 | -0.00008800 |
| C | 0.70269000  | 4.01087500  | 0.62139800  | C               | 3.33780800  | -1.60279800 | -0.00008800 |
| O | 2.45944900  | 6.94847700  | -0.66079200 | C               | 4.33779400  | -0.59460000 | -0.00002000 |
| C | 1.58010100  | 8.00766800  | -0.30552800 | C               | 3.98334500  | 0.77828400  | -0.00003700 |
| H | 3.51979000  | 2.61789300  | -0.71020400 | C               | 2.65671800  | 1.12670000  | -0.00005100 |
| H | 3.95788200  | 5.02344000  | -1.23019700 | O               | 5.57734100  | -1.03300900 | 0.00000900  |
| H | 0.22548400  | 6.09382400  | 0.63205600  | C               | 6.66819200  | -0.10717200 | 0.00026400  |
| H | -0.20666000 | 3.72848000  | 1.14094600  | H               | 1.23884400  | -2.00570400 | -0.00009400 |
| H | 2.05652400  | 8.91831800  | -0.66274900 | H               | 3.66035300  | -2.63739500 | -0.00010600 |
| H | 0.60747300  | 7.88396000  | -0.79206400 | H               | 4.74568100  | 1.54674400  | -0.00006300 |
| H | 1.45297700  | 8.05827500  | 0.78038800  | H               | 2.36744800  | 2.17252200  | -0.00005800 |
| C | 2.25543300  | -1.59572900 | 1.31938300  | H               | 7.56608600  | -0.72029200 | 0.00058500  |
| C | 3.65037600  | -1.61390900 | 1.16861500  | H               | 6.63895100  | 0.51356400  | -0.89901100 |
| C | 1.61008400  | -2.62635200 | 2.02066600  | H               | 6.63841300  | 0.51371100  | 0.89941700  |
| C | 4.38798800  | -2.66465400 | 1.69361300  | C               | -3.16895500 | -0.20178100 | -0.00001300 |
| H | 4.13669800  | -0.79555900 | 0.64950700  | C               | -3.35211000 | -1.60397700 | -0.00012500 |
| C | 2.35983100  | -3.67285800 | 2.54503200  | C               | -4.28626300 | 0.66286500  | 0.00017400  |
| H | 0.53699900  | -2.59591800 | 2.16819400  | C               | -4.63029500 | -2.12629600 | -0.00007500 |
| C | 3.74261800  | -3.69717500 | 2.37529500  | H               | -2.48072000 | -2.24981700 | -0.00025500 |
| H | 5.46659200  | -2.67713900 | 1.58046800  | C               | -5.56165700 | 0.12343700  | 0.00024900  |



|               |             |             |             |   |             |             |             |
|---------------|-------------|-------------|-------------|---|-------------|-------------|-------------|
| H             | -4.14610700 | 1.73753000  | 0.00025600  | H | -2.76416900 | -3.03788400 | -0.62946700 |
| C             | -5.73304000 | -1.26289800 | 0.00011700  | H | -1.54710300 | 0.48195000  | -1.97236200 |
| H             | -4.78079500 | -3.19991000 | -0.00018700 | H | 0.64377000  | -0.42118000 | -0.46374000 |
| H             | -6.42570800 | 0.77806200  | 0.00040900  | H | 5.09451800  | -2.72340400 | -1.69299100 |
| H             | -6.73614100 | -1.67765300 | 0.00014700  | H | 6.81225800  | -4.18697900 | -0.66623100 |
| <b>INT3-C</b> |             |             |             | H | 6.13451600  | -5.96594500 | 0.92096700  |
| C             | -5.86165900 | 0.54750900  | -1.84293700 | H | 3.73922500  | -6.28623400 | 1.47760200  |
| C             | -6.24000000 | -0.77378100 | -1.58962600 | H | 2.01849200  | -4.82322700 | 0.43334300  |
| C             | -5.29640700 | -1.73041900 | -1.22218100 | H | 2.80467700  | -2.12422500 | -2.04260300 |
| C             | -3.99282000 | -1.27964900 | -1.10831800 | H | 1.60498500  | -3.42409500 | -1.76927700 |
| C             | -3.58650800 | 0.03978100  | -1.32422900 | O | -1.00475800 | 3.22846600  | 0.06516400  |
| C             | -4.53548300 | 0.97156000  | -1.72099500 | C | 0.08569900  | 2.39435200  | 0.05720200  |
| N             | -2.83197300 | -2.03103200 | -0.81631700 | N | -0.18018600 | 1.13892400  | 0.08148500  |
| C             | -1.75048300 | -1.32488400 | -0.81812800 | C | -1.62126300 | 0.98637700  | 0.15126700  |
| C             | -2.09107700 | 0.12686000  | -1.08792100 | C | -2.12558200 | 2.43735400  | 0.07262500  |
| C             | -0.48805700 | -2.13614300 | -0.55703400 | O | -3.23026500 | 2.87976800  | 0.04620300  |
| O             | -0.62375700 | -3.33527300 | -0.39547000 | C | 1.38926300  | 3.02049900  | 0.01520300  |
| N             | 0.65297200  | -1.43799800 | -0.63343800 | C | 2.54619000  | 2.22205600  | 0.08800900  |
| O             | 1.79913100  | -2.06852000 | -0.21967200 | C | 3.79094200  | 2.80591200  | 0.04658100  |
| C             | 3.45234500  | -3.68948700 | -0.69500900 | C | 3.91162500  | 4.20478500  | -0.06602700 |
| C             | 4.79906900  | -3.50628100 | -0.99935400 | C | 2.76357300  | 5.00569500  | -0.13367100 |
| C             | 5.76462200  | -4.32810600 | -0.42170100 | C | 1.51165100  | 4.40919900  | -0.09102900 |
| C             | 5.38305400  | -5.32604400 | 0.46985300  | O | 5.16449100  | 4.67337900  | -0.09671500 |
| C             | 4.03559600  | -5.50679400 | 0.78323800  | C | 5.36204600  | 6.07559700  | -0.19385300 |
| C             | 3.07228000  | -4.69305200 | 0.20002600  | H | 2.45623900  | 1.14455800  | 0.19074100  |
| C             | 2.39360700  | -2.82237800 | -1.30563100 | H | 4.69918800  | 2.21735300  | 0.10709300  |
| H             | -6.61646100 | 1.26495300  | -2.14562700 | H | 2.83844900  | 6.08252800  | -0.21609600 |
| H             | -7.27948600 | -1.06370500 | -1.69393400 | H | 0.62145500  | 5.02709200  | -0.14004800 |
| H             | -5.56696000 | -2.76538200 | -1.04474800 | H | 6.44027000  | 6.22346500  | -0.19680200 |
| H             | -4.27145000 | 2.00228900  | -1.91952600 | H | 4.93400700  | 6.46666000  | -1.12277600 |

|               |             |             |             |   |             |             |             |
|---------------|-------------|-------------|-------------|---|-------------|-------------|-------------|
| H             | 4.92157000  | 6.59181700  | 0.66545000  | C | -8.03623200 | 0.43875700  | 0.08992200  |
| C             | -2.08674700 | 0.31685800  | 1.44772100  | C | -7.12240400 | -0.58346100 | -0.15847100 |
| C             | -1.17358600 | -0.40535000 | 2.22157600  | C | -4.76888500 | -1.36925300 | -0.59903100 |
| C             | -3.43399500 | 0.36096700  | 1.81953500  | H | 3.83239900  | -5.20780000 | -2.77225300 |
| C             | -1.61093900 | -1.09120900 | 3.35182800  | H | 4.66666300  | -2.89549400 | -2.88630300 |
| H             | -0.12217200 | -0.41852400 | 1.95334300  | H | 3.30074100  | -0.99577200 | -1.98528600 |
| C             | -3.86081100 | -0.32469400 | 2.95394000  | H | 1.60095800  | -5.71565500 | -1.80274200 |
| H             | -4.14267500 | 0.94639600  | 1.24195700  | H | 0.41674400  | -0.67785200 | -1.43050600 |
| C             | -2.95384800 | -1.05567100 | 3.71743800  | H | -0.84576400 | -4.38396900 | -0.73557700 |
| H             | -0.89583500 | -1.64613600 | 3.94970400  | H | -2.57639100 | -2.85801800 | 0.88607000  |
| H             | -4.90480600 | -0.27677800 | 3.24535400  | H | -4.27090000 | 1.24699700  | -0.33295800 |
| H             | -3.29071500 | -1.58570000 | 4.60210300  | H | -5.89704300 | 3.07728300  | 0.12182700  |
| <b>INT3-N</b> |             |             |             | H | -8.30560500 | 2.55078700  | 0.38755400  |
| C             | 3.21902200  | -4.40238400 | -2.38348800 | H | -9.08922700 | 0.20587000  | 0.20916400  |
| C             | 3.69499000  | -3.09039300 | -2.44619700 | H | -7.46344800 | -1.61289600 | -0.22965700 |
| C             | 2.94285800  | -2.01876500 | -1.95565800 | H | -5.23717300 | -2.35756300 | -0.66438300 |
| C             | 1.71091100  | -2.33986300 | -1.42842200 | H | -4.21550300 | -1.16771300 | -1.52304300 |
| C             | 1.20718400  | -3.63915300 | -1.35323700 | O | 0.42795000  | 1.30312100  | 1.21415600  |
| C             | 1.96918000  | -4.69626400 | -1.83928900 | C | 1.47510700  | 1.51726800  | 0.34234900  |
| N             | 0.73969000  | -1.43287000 | -0.80344200 | N | 2.03854800  | 0.46149400  | -0.13712800 |
| C             | -0.42862500 | -2.28222400 | -0.51167600 | C | 1.36674300  | -0.66094800 | 0.43569000  |
| C             | -0.14571400 | -3.56014800 | -0.80427000 | C | 0.24115000  | -0.04226100 | 1.30176300  |
| C             | -1.67481600 | -1.48266700 | -0.34416700 | O | -0.58762300 | -0.56788900 | 1.97398900  |
| O             | -1.67974800 | -0.34751800 | -0.79612000 | C | 1.81283900  | 2.89391600  | 0.07564100  |
| N             | -2.73113900 | -2.12808800 | 0.19863800  | C | 2.88693100  | 3.18609900  | -0.78636300 |
| O             | -3.82793900 | -1.35511200 | 0.49704100  | C | 3.22045500  | 4.49288000  | -1.05335700 |
| C             | -5.77067600 | -0.28934200 | -0.31810500 | C | 2.48869800  | 5.54241500  | -0.46296700 |
| C             | -5.33021500 | 1.03285400  | -0.21631000 | C | 1.41907700  | 5.25803600  | 0.39821500  |
| C             | -6.24000400 | 2.05082300  | 0.04106300  | C | 1.08854200  | 3.93774100  | 0.66242800  |
| C             | -7.59506600 | 1.75437900  | 0.19100400  | O | 2.89229400  | 6.77574600  | -0.78465200 |

|   |            |             |             |   |             |             |             |
|---|------------|-------------|-------------|---|-------------|-------------|-------------|
| C | 2.20559900 | 7.88437700  | -0.22335800 | O | 0.28299000  | -3.55789500 | -1.04174300 |
| H | 3.44785700 | 2.37173800  | -1.23271200 | N | 0.74125400  | -1.29097100 | -1.07102600 |
| H | 4.04259400 | 4.75025200  | -1.71124200 | O | 2.07081800  | -1.52974100 | -1.25645800 |
| H | 0.84851700 | 6.05344100  | 0.86046000  | C | 3.78658400  | -2.11981600 | -2.77606800 |
| H | 0.26212200 | 3.71438700  | 1.32842100  | C | 4.85705200  | -1.35190300 | -3.22826900 |
| H | 2.70036200 | 8.76970300  | -0.61800700 | C | 6.12752700  | -1.91484500 | -3.32557400 |
| H | 1.15320600 | 7.88460900  | -0.52547000 | C | 6.32856600  | -3.24182700 | -2.95832300 |
| H | 2.27998300 | 7.87641700  | 0.86897400  | C | 5.26032700  | -4.00999800 | -2.49439000 |
| C | 2.23198400 | -1.59760100 | 1.24626700  | C | 3.99143000  | -3.45164200 | -2.40615400 |
| C | 3.62165200 | -1.47027100 | 1.18376200  | C | 2.41134200  | -1.53671700 | -2.67098900 |
| C | 1.65280400 | -2.58749700 | 2.04694100  | H | -6.48161900 | 0.27312800  | 0.50223400  |
| C | 4.42911500 | -2.34118000 | 1.90668800  | H | -6.75671900 | -2.10638400 | 1.06325100  |
| H | 4.05871800 | -0.68348700 | 0.57879500  | H | -4.88609900 | -3.72156600 | 0.72621600  |
| C | 2.46870700 | -3.45964400 | 2.76050100  | H | -4.33789300 | 1.14161200  | -0.41651700 |
| H | 0.57466700 | -2.65992000 | 2.13629100  | H | -2.16270400 | -3.80658100 | -0.09909700 |
| C | 3.85456200 | -3.33981300 | 2.68964500  | H | -2.00874000 | -0.29752600 | -1.93270400 |
| H | 5.50780000 | -2.23557300 | 1.86271000  | H | 4.69739900  | -0.31348200 | -3.50615000 |
| H | 2.01937700 | -4.22276300 | 3.38693400  | H | 6.95848800  | -1.31616700 | -3.68406000 |
| H | 4.48633700 | -4.01602000 | 3.25606800  | H | 7.31851900  | -3.68051000 | -3.03263700 |

**INT4-C**

|   |             |             |             |   |             |             |             |
|---|-------------|-------------|-------------|---|-------------|-------------|-------------|
| C | -5.65004900 | -0.40597800 | 0.34792600  | H | 5.41901000  | -5.04438800 | -2.20709800 |
| C | -5.80855300 | -1.75799700 | 0.66910200  | H | 3.15090400  | -4.03848500 | -2.04327000 |
| C | -4.77100200 | -2.66990400 | 0.48735100  | H | 2.36416600  | -0.50985800 | -3.04428000 |
| C | -3.59128600 | -2.14816000 | -0.01489500 | H | 1.67137700  | -2.15901100 | -3.18793300 |
| C | -3.40284000 | -0.79959200 | -0.33982300 | O | 0.72410600  | 1.01356200  | 1.82436500  |
| C | -4.45070300 | 0.09128300  | -0.16767000 | C | -0.04267600 | -0.05724300 | 2.08013500  |
| N | -2.37264100 | -2.82704400 | -0.29944400 | N | -0.90933000 | -0.45788900 | 1.22317200  |
| C | -1.48546900 | -2.01602600 | -0.76995000 | C | -0.98792700 | 0.22403700  | -0.06488900 |
| C | -2.01254200 | -0.63850200 | -0.88850100 | C | 0.37308600  | 0.07258700  | -0.80074800 |
| C | -0.05754200 | -2.40175900 | -0.96435100 | O | 1.12201300  | 0.95040800  | -1.10506100 |
|   |             |             |             | C | 0.12787500  | -0.74336400 | 3.37247900  |

|               |             |             |             |   |             |             |             |
|---------------|-------------|-------------|-------------|---|-------------|-------------|-------------|
| C             | -0.22575800 | -2.09511100 | 3.50255900  | C | 1.85121300  | -2.41367800 | -1.74137600 |
| C             | -0.06531000 | -2.74879000 | 4.70473400  | C | 1.71185600  | -3.80252900 | -1.67512800 |
| C             | 0.44432300  | -2.06118300 | 5.82018900  | C | 2.79716500  | -4.61707600 | -1.98475400 |
| C             | 0.78541300  | -0.70912800 | 5.70770500  | N | 0.56266000  | -1.80340900 | -1.37809100 |
| C             | 0.62633500  | -0.06487000 | 4.48582300  | C | -0.31721300 | -2.94634500 | -1.11138900 |
| O             | 0.56292600  | -2.78550200 | 6.94373000  | C | 0.34178600  | -4.10006000 | -1.27635400 |
| C             | 1.08208700  | -2.15099700 | 8.10111700  | C | -1.68487900 | -2.69095800 | -0.62849300 |
| H             | -0.61400700 | -2.62054300 | 2.63642900  | O | -2.55045000 | -3.52466500 | -0.63348100 |
| H             | -0.31630300 | -3.79704900 | 4.82288100  | N | -1.87765400 | -1.38023500 | -0.16956700 |
| H             | 1.16260000  | -0.15455700 | 6.55777400  | O | -3.11421500 | -1.11169800 | 0.34639700  |
| H             | 0.85995400  | 0.99603700  | 4.43060600  | C | -5.12706500 | 0.10520700  | 0.07841700  |
| H             | 1.10083100  | -2.91506600 | 8.87612800  | C | -4.89108100 | 1.11579500  | 1.01431300  |
| H             | 2.09815600  | -1.78292800 | 7.92292600  | C | -5.95480300 | 1.68654200  | 1.70171300  |
| H             | 0.43748300  | -1.32353400 | 8.41658500  | C | -7.25803600 | 1.25509500  | 1.45283600  |
| C             | -1.48778400 | 1.65717600  | -0.03509000 | C | -7.49463700 | 0.24766400  | 0.52284100  |
| C             | -2.09603900 | 2.16349600  | 1.11344300  | C | -6.42757200 | -0.33195300 | -0.16009300 |
| C             | -1.46039200 | 2.43232000  | -1.19769400 | C | -3.96493400 | -0.49522400 | -0.65206100 |
| C             | -2.65841700 | 3.43765800  | 1.10325300  | H | 4.85228500  | -4.61294600 | -2.60000400 |
| H             | -2.14427500 | 1.55703900  | 2.01210900  | H | 5.04059000  | -2.16079000 | -2.71539300 |
| C             | -2.02408300 | 3.70353300  | -1.20563500 | H | 3.10253000  | -0.69814400 | -2.15660400 |
| H             | -0.98060100 | 2.05721100  | -2.09739500 | H | 2.71278400  | -5.69748600 | -1.94179200 |
| C             | -2.62511400 | 4.20930000  | -0.05447300 | H | 0.19171300  | -1.24846100 | -2.16729200 |
| H             | -3.12473800 | 3.82498900  | 2.00334700  | H | -0.09441800 | -5.07859400 | -1.11798400 |
| H             | -1.98753900 | 4.30157000  | -2.11017700 | H | -3.86956700 | 1.43677000  | 1.20310300  |
| H             | -3.06267200 | 5.20223400  | -0.06100200 | H | -5.77149600 | 2.46923300  | 2.43079800  |
| H             | 1.46460600  | 1.06629300  | 2.44947300  | H | -8.08861800 | 1.70428700  | 1.98795700  |
| <b>INT4-N</b> |             |             |             | H | -8.50728600 | -0.09272300 | 0.33285300  |
| C             | 3.99047400  | -4.00178200 | -2.35504800 | H | -6.60746000 | -1.12737200 | -0.87852600 |
| C             | 4.09795100  | -2.60997100 | -2.42240500 | H | -4.27886800 | -1.26086200 | -1.36934600 |
| C             | 3.01710300  | -1.77805600 | -2.11878100 | H | -3.37070400 | 0.27200200  | -1.16285900 |

---

|   |             |             |             |             |             |             |             |
|---|-------------|-------------|-------------|-------------|-------------|-------------|-------------|
| O | -0.20117800 | 0.71857900  | -2.21205300 | H           | 0.46974800  | -3.50249100 | 3.66144300  |
| C | 0.88186400  | 1.11571100  | -1.48330600 | H           | 2.91925600  | -3.29769000 | 4.00445800  |
| N | 1.33931000  | 0.35581100  | -0.55921300 | H           | -0.59739700 | 1.47230700  | -2.68081500 |
| C | 0.58502700  | -0.78310000 | -0.15702800 | <b>3a-H</b> |             |             |             |
| C | -0.90470800 | -0.41606900 | 0.12019200  | C           | -5.58345700 | -0.18379200 | 0.34282200  |
| O | -1.18948000 | 0.64984900  | 0.58745000  | C           | -5.87337200 | -1.53346700 | 0.56367000  |
| C | 1.51123800  | 2.38778800  | -1.83351700 | C           | -4.93164200 | -2.52931000 | 0.30500500  |
| C | 2.30747100  | 3.04356900  | -0.87732500 | C           | -3.70878500 | -2.09333800 | -0.17405900 |
| C | 2.90180000  | 4.24820800  | -1.17840900 | C           | -3.39386400 | -0.74862800 | -0.41012800 |
| C | 2.72299900  | 4.82919200  | -2.44757000 | C           | -4.34308200 | 0.22866400  | -0.15304400 |
| C | 1.94355300  | 4.17676200  | -3.41246100 | N           | -2.55223100 | -2.86365100 | -0.49794600 |
| C | 1.34542600  | 2.96447200  | -3.09652200 | C           | -1.58694600 | -2.11131900 | -0.90729300 |
| O | 3.33865300  | 6.00173300  | -2.63909500 | C           | -1.99441400 | -0.68458600 | -0.96463500 |
| C | 3.18625200  | 6.65321100  | -3.89108000 | C           | -0.19745000 | -2.63174000 | -1.09906900 |
| H | 2.42789200  | 2.59332300  | 0.10220000  | O           | 0.01033700  | -3.81522500 | -1.22564800 |
| H | 3.50722900  | 4.78052600  | -0.45340000 | N           | 0.70295500  | -1.60731800 | -1.13449100 |
| H | 1.80935700  | 4.59779100  | -4.40086900 | O           | 2.00990700  | -1.92122100 | -1.34368700 |
| H | 0.78007100  | 2.45573100  | -3.87458200 | C           | 3.79866200  | -2.01984900 | -2.89178000 |
| H | 3.75181800  | 7.57978300  | -3.81358400 | C           | 4.50236200  | -0.86625600 | -2.53579500 |
| H | 3.59348300  | 6.04040700  | -4.70222200 | C           | 5.88722900  | -0.83856000 | -2.64040600 |
| H | 2.13297100  | 6.87981200  | -4.08696300 | C           | 6.57359900  | -1.96027900 | -3.10609300 |
| C | 1.21411300  | -1.48199900 | 1.03446200  | C           | 5.87497400  | -3.11072000 | -3.45929900 |
| C | 2.58968900  | -1.34705900 | 1.24510400  | C           | 4.48701700  | -3.14236600 | -3.34587600 |
| C | 0.45387400  | -2.26090600 | 1.91304200  | C           | 2.30689100  | -2.02837900 | -2.76725300 |
| C | 3.20002900  | -2.00634800 | 2.30532700  | H           | -6.34116500 | 0.56120900  | 0.56011900  |
| H | 3.16688500  | -0.70608400 | 0.58893200  | H           | -6.84925700 | -1.81520600 | 0.94323500  |
| C | 1.06973100  | -2.91153200 | 2.97788200  | H           | -5.14979000 | -3.57856500 | 0.47192400  |
| H | -0.62332000 | -2.34934200 | 1.80697300  | H           | -4.12510400 | 1.27784900  | -0.32739100 |
| C | 2.44257700  | -2.79206700 | 3.17103300  | H           | -2.42867100 | -3.86964200 | -0.36037900 |
| H | 4.26746800  | -1.89440500 | 2.46371500  | H           | -1.98480300 | -0.32369300 | -2.00271900 |

|                                      |                                       |
|--------------------------------------|---------------------------------------|
| H 3.95515700 -0.00073000 -2.17065400 | C -1.36364600 2.27905600 -1.26977700  |
| H 6.43367900 0.05704900 -2.36310500  | C -1.71075600 3.55327000 1.17724000   |
| H 7.65527700 -1.93580700 -3.19229700 | H -1.22294500 1.66933400 2.07472300   |
| H 6.40870900 -3.98452800 -3.81845500 | C -1.70727600 3.62426600 -1.23064500  |
| H 3.93821200 -4.04184400 -3.61237400 | H -1.19704700 1.80244800 -2.23246100  |
| H 1.85569300 -1.16291400 -3.26271200 | C -1.88730400 4.26381000 -0.00430400  |
| H 1.86669100 -2.95641300 -3.14618200 | H -1.83386500 4.04712400 2.13531100   |
| O 1.35767900 -0.26824300 1.38519200  | H -1.82485600 4.17644700 -2.15707100  |
| C 0.30489300 -0.56061200 1.91635700  | H -2.15421700 5.31494900 0.02641200   |
| N -0.86924700 -0.60556700 1.14773800 | H -1.73102200 -0.48123200 1.67030400  |
| C -0.89429100 0.06953300 -0.14470700 | <b>3a'-H</b>                          |
| C 0.42720800 -0.21188200 -0.91909000 | C 3.79203500 -4.20461000 -2.54884200  |
| O 1.12745300 0.61711300 -1.41082500  | C 3.92978900 -2.81748300 -2.65666600  |
| C 0.16819700 -0.91063400 3.34720100  | C 2.89433300 -1.95163100 -2.29649300  |
| C -0.98724500 -1.47914600 3.90732900 | C 1.74629000 -2.54598600 -1.80910000  |
| C -1.04113100 -1.77291800 5.25454500 | C 1.57004900 -3.92992800 -1.72156700  |
| C 0.06464500 -1.50420500 6.07857100  | C 2.60927400 -4.77957300 -2.09091100  |
| C 1.22554800 -0.94674100 5.52844000  | N 0.49955700 -1.89625400 -1.39717200  |
| C 1.26725600 -0.66041800 4.17116300  | C -0.40869700 -3.00437800 -1.09445300 |
| O -0.08838500 -1.82189000 7.37364500 | C 0.20739100 -4.18080000 -1.26889500  |
| C 0.99929400 -1.59194400 8.25506400  | C -1.76287000 -2.70875100 -0.59499100 |
| H -1.84574600 -1.73297600 3.28997200 | O -2.63922500 -3.52781000 -0.53915400 |
| H -1.91891800 -2.22111800 5.70639900 | N -1.93275300 -1.36975000 -0.20791900 |
| H 2.09079600 -0.73786100 6.14531100  | O -3.15720900 -1.03933100 0.29730300  |
| H 2.16046000 -0.23326700 3.72689100  | C -5.16527100 0.16735000 -0.03607800  |
| H 0.66157500 -1.92179700 9.23591800  | C -4.93450300 1.26473900 0.79773600   |
| H 1.87702800 -2.17314100 7.95328700  | C -5.99509500 1.86760500 1.46217200   |
| H 1.25451400 -0.52757700 8.29271100  | C -7.29127600 1.38063200 1.29174400   |
| C -1.19854100 1.55591100 -0.08320100 | C -7.52342200 0.28708700 0.46323300   |
| C -1.36877900 2.20226300 1.14006300  | C -6.45885800 -0.32350900 -0.19595400 |

|   |             |             |             |             |             |             |             |
|---|-------------|-------------|-------------|-------------|-------------|-------------|-------------|
| C | -4.00585000 | -0.47004200 | -0.73767400 | H           | 1.62320000  | 4.59147700  | -4.43202700 |
| H | 4.61690300  | -4.84390100 | -2.84403300 | H           | 0.79003400  | 2.31510200  | -3.96994900 |
| H | 4.85628000  | -2.40104000 | -3.03673400 | H           | 3.14311900  | 7.77335900  | -3.67018900 |
| H | 2.99575400  | -0.87688500 | -2.39196100 | H           | 3.25247100  | 6.23316300  | -4.56542100 |
| H | 2.49459900  | -5.85662500 | -2.03485500 | H           | 1.65155900  | 6.89029200  | -4.09622200 |
| H | 0.15103200  | -1.25380300 | -2.16650400 | C           | 1.11415700  | -1.53837200 | 1.03712700  |
| H | -0.25753100 | -5.14351100 | -1.09661300 | C           | 2.50001800  | -1.70677100 | 1.14675300  |
| H | -3.91879500 | 1.63163400  | 0.92399700  | C           | 0.28092200  | -1.96549700 | 2.07593100  |
| H | -5.81538400 | 2.71943200  | 2.11016700  | C           | 3.04174500  | -2.30563500 | 2.27839700  |
| H | -8.12016900 | 1.85534200  | 1.80712700  | H           | 3.15785800  | -1.37493500 | 0.34930200  |
| H | -8.53085200 | -0.09434100 | 0.33279500  | C           | 0.83111100  | -2.56209400 | 3.20624800  |
| H | -6.63494400 | -1.18358100 | -0.83654800 | H           | -0.79445600 | -1.81942200 | 2.03401200  |
| H | -4.32068700 | -1.27372300 | -1.41091100 | C           | 2.20806500  | -2.73642200 | 3.30774100  |
| H | -3.40867700 | 0.26643200  | -1.28679000 | H           | 4.11636200  | -2.43146300 | 2.35619700  |
| O | 0.09260600  | 0.41914200  | -2.51950100 | H           | 0.17808200  | -2.88283500 | 4.01053100  |
| C | 0.86975700  | 0.96482700  | -1.72612300 | H           | 2.63276800  | -3.19970900 | 4.19214600  |
| N | 1.31946100  | 0.22553600  | -0.64297800 | H           | 1.88379300  | 0.67181900  | 0.06788700  |
| C | 0.54232100  | -0.89075900 | -0.20646900 | <b>DDQH</b> |             |             |             |
| C | -0.93363900 | -0.42912800 | 0.01153900  | C           | -0.11330000 | 0.40940100  | 0.03158000  |
| O | -1.15485400 | 0.68119200  | 0.40697200  | C           | 1.33283600  | 0.46215400  | 0.01459700  |
| C | 1.39095200  | 2.32033300  | -1.91275600 | C           | 2.05977900  | 1.67120700  | -0.06259900 |
| C | 1.97834300  | 3.07045400  | -0.87850700 | C           | 1.42084000  | 2.90149900  | -0.12813400 |
| C | 2.43981900  | 4.34585500  | -1.11949600 | C           | 0.01248900  | 2.90229100  | -0.11478500 |
| C | 2.32532200  | 4.90681100  | -2.40452700 | C           | -0.72314100 | 1.73909700  | -0.04003100 |
| C | 1.72853400  | 4.17243600  | -3.43914900 | O           | 2.17152500  | 4.04155000  | -0.20266800 |
| C | 1.26247200  | 2.89269500  | -3.18219800 | H           | 1.56594000  | 4.79694900  | -0.23128500 |
| O | 2.80762700  | 6.14786600  | -2.53606300 | O           | -0.77866000 | -0.63146200 | 0.09872400  |
| C | 2.70039300  | 6.78759100  | -3.79938100 | Cl          | -0.77372000 | 4.47069000  | -0.19791000 |
| H | 2.03826900  | 2.68646900  | 0.13641900  | Cl          | -2.45394300 | 1.77950000  | -0.02562900 |
| H | 2.88143800  | 4.94931300  | -0.33469500 | C           | 3.49640600  | 1.66213400  | -0.07541700 |

|              |             |             |             |   |             |             |             |
|--------------|-------------|-------------|-------------|---|-------------|-------------|-------------|
| C            | 2.02893500  | -0.78128600 | 0.08062600  | C | -0.40581700 | -2.78627400 | -1.06509100 |
| N            | 4.65444200  | 1.66096900  | -0.08598200 | O | -0.22209600 | -3.90212000 | -1.50081900 |
| N            | 2.60776900  | -1.78577300 | 0.13385300  | N | 0.62513500  | -1.88709200 | -0.78442900 |
| <b>DDQH2</b> |             |             |             | O | 1.88844400  | -2.27287000 | -1.14133700 |
| C            | 0.00491400  | 0.45172900  | 0.14909400  | C | 3.57279000  | -2.10118800 | -2.79836300 |
| C            | 1.40189600  | 0.46394700  | 0.07807100  | C | 4.27397900  | -1.04291500 | -2.21349000 |
| C            | 2.10048500  | 1.67375900  | -0.06242300 | C | 5.64128700  | -0.91499600 | -2.42592300 |
| C            | 1.41272800  | 2.88971600  | -0.13447800 | C | 6.31581600  | -1.83746800 | -3.22622100 |
| C            | 0.01391200  | 2.87241900  | -0.06380700 | C | 5.62020700  | -2.89225900 | -3.80821500 |
| C            | -0.67944100 | 1.67170500  | 0.07602700  | C | 4.25051300  | -3.02612800 | -3.58840900 |
| O            | 2.13643900  | 4.01156100  | -0.26864600 | C | 2.09287900  | -2.21349400 | -2.57015000 |
| H            | 1.55251000  | 4.78630000  | -0.30597500 | H | -6.31357700 | 0.84192400  | 0.22951500  |
| O            | -0.60497100 | -0.73579100 | 0.28381000  | H | -7.22249500 | -1.27242400 | -0.66372700 |
| H            | -1.56794700 | -0.61745400 | 0.31947900  | H | -5.72034200 | -3.11750100 | -1.36036100 |
| Cl           | -0.82597900 | 4.38114600  | -0.15697000 | H | -3.87187300 | 1.18634200  | 0.45651700  |
| Cl           | -2.40623800 | 1.64468800  | 0.16329800  | H | -2.94615500 | -3.75869000 | -1.54181600 |
| C            | 3.53259000  | 1.68557100  | -0.13557300 | H | 3.73334400  | -0.33464200 | -1.59141000 |
| C            | 2.10757100  | -0.78229100 | 0.15094000  | H | 6.18397400  | -0.09346100 | -1.96850400 |
| N            | 4.68727300  | 1.69243900  | -0.19447200 | H | 7.38389400  | -1.73396000 | -3.39230700 |
| N            | 2.67881700  | -1.78584100 | 0.20902100  | H | 6.14257100  | -3.61586200 | -4.42644100 |
| <b>3a</b>    |             |             |             | H | 3.70548400  | -3.85618100 | -4.03072300 |
| C            | -5.62695700 | 0.05301100  | -0.05922600 | H | 1.57199900  | -1.32862700 | -2.95176600 |
| C            | -6.14737200 | -1.15570500 | -0.57186700 | H | 1.67493400  | -3.11492000 | -3.02863000 |
| C            | -5.32062900 | -2.19017600 | -0.96275600 | O | 1.28660200  | 0.58822900  | 1.94325000  |
| C            | -3.94031400 | -1.99523800 | -0.82596900 | C | 0.41668000  | -0.15215700 | 2.36312400  |
| C            | -3.39585200 | -0.78719100 | -0.30988000 | N | -0.65453800 | -0.52467300 | 1.58847000  |
| C            | -4.26769500 | 0.25075500  | 0.07384300  | C | -0.84074200 | -0.10590400 | 0.20001100  |
| N            | -2.89787200 | -2.83741600 | -1.13017600 | C | 0.45136200  | -0.48994000 | -0.58805700 |
| C            | -1.72659400 | -2.20038300 | -0.83004100 | O | 1.27206800  | 0.28909700  | -0.98005400 |
| C            | -1.97142600 | -0.95088100 | -0.33320600 | C | 0.42640700  | -0.69825800 | 3.75588400  |



|            |             |             |             |   |             |             |             |
|------------|-------------|-------------|-------------|---|-------------|-------------|-------------|
| C          | -0.27273800 | -1.84592700 | 4.15136700  | C | 1.94717800  | -2.50033400 | -1.43886800 |
| C          | -0.21075900 | -2.29129800 | 5.45946800  | C | 1.70769200  | -3.48198300 | -2.43263500 |
| C          | 0.55527000  | -1.59391700 | 6.40235500  | C | 2.79866500  | -4.04135500 | -3.12103000 |
| C          | 1.26890700  | -0.45588000 | 6.01639100  | N | 0.72615500  | -2.12782700 | -0.91569800 |
| C          | 1.20218700  | -0.02473300 | 4.69592400  | C | -0.26015200 | -2.84212500 | -1.57137200 |
| O          | 0.54755800  | -2.10411700 | 7.65645900  | C | 0.29345600  | -3.68183300 | -2.49551900 |
| C          | 1.32659900  | -1.44958000 | 8.63570100  | C | -1.67729300 | -2.66191700 | -1.25720700 |
| H          | -0.84053500 | -2.42625300 | 3.42897800  | O | -2.57989600 | -3.23470800 | -1.81742500 |
| H          | -0.73434900 | -3.18484500 | 5.78126700  | N | -1.91643600 | -1.75551100 | -0.20871600 |
| H          | 1.87558300  | 0.09198700  | 6.72728200  | O | -3.22578800 | -1.53129600 | 0.11525600  |
| H          | 1.76031500  | 0.84735600  | 4.37058600  | C | -5.01129100 | 0.01224500  | -0.12295100 |
| H          | 1.18961000  | -2.01495100 | 9.55692400  | C | -4.81234200 | 0.66843900  | 1.09505800  |
| H          | 2.38816000  | -1.44777900 | 8.36221700  | C | -5.88442800 | 1.26783700  | 1.74516600  |
| H          | 0.98924400  | -0.41746200 | 8.78706100  | C | -7.16023300 | 1.22193000  | 1.18242900  |
| C          | -1.14137400 | 1.37921600  | 0.02862600  | C | -7.36121500 | 0.56868600  | -0.02919700 |
| C          | -1.31007300 | 2.22779200  | 1.11791600  | C | -6.28797900 | -0.04062000 | -0.67672900 |
| C          | -1.34301200 | 1.87350100  | -1.26184400 | C | -3.83769000 | -0.61247300 | -0.82090000 |
| C          | -1.68296400 | 3.55652400  | 0.91972100  | H | 4.92679600  | -4.03782500 | -3.33069600 |
| H          | -1.15977200 | 1.85515500  | 2.12489500  | H | 5.30671100  | -2.33680900 | -1.58096500 |
| C          | -1.71057000 | 3.19809900  | -1.46029100 | H | 3.41606600  | -1.33878500 | -0.33432900 |
| H          | -1.21641700 | 1.21274700  | -2.11589300 | H | 2.63276400  | -4.79381900 | -3.88579700 |
| C          | -1.88523200 | 4.04444200  | -0.36661200 | H | -0.26391500 | -4.34983300 | -3.13568700 |
| H          | -1.81165500 | 4.20966300  | 1.77722100  | H | -3.81162600 | 0.69189300  | 1.51824100  |
| H          | -1.86414600 | 3.56944600  | -2.46857100 | H | -5.72750100 | 1.77442100  | 2.69270100  |
| H          | -2.17521600 | 5.07936700  | -0.51888500 | H | -7.99612400 | 1.69262800  | 1.69121600  |
| H          | -1.43320000 | -1.00544300 | 2.01491800  | H | -8.35350000 | 0.52479500  | -0.46759900 |
| <b>3a'</b> |             |             |             | H | -6.44342200 | -0.56333300 | -1.61700500 |
| C          | 4.07418000  | -3.61720400 | -2.80770400 | H | -4.13862400 | -1.16893200 | -1.71347500 |
| C          | 4.29091300  | -2.64329100 | -1.80990100 | H | -3.08975300 | 0.13984400  | -1.09560500 |
| C          | 3.24204000  | -2.07336800 | -1.11295700 | O | -0.51222200 | 0.36818500  | -1.98453200 |

---

|   |             |             |             |   |            |             |            |
|---|-------------|-------------|-------------|---|------------|-------------|------------|
| C | 0.50178800  | 0.80805000  | -1.46209300 | H | 2.54371300 | -2.32463700 | 4.91933300 |
| N | 1.08280800  | 0.15266900  | -0.40468800 | H | 1.77003900 | 0.61260100  | 0.17423600 |
| C | 0.50250000  | -1.08404600 | 0.06673100  |   |            |             |            |
| C | -1.02007100 | -0.82976000 | 0.29548500  |   |            |             |            |
| O | -1.36721700 | 0.11330100  | 0.96071500  |   |            |             |            |
| C | 1.17166700  | 2.05722800  | -1.91267800 |   |            |             |            |
| C | 2.52710600  | 2.32426400  | -1.68029100 |   |            |             |            |
| C | 3.09531800  | 3.50324300  | -2.12623900 |   |            |             |            |
| C | 2.31426300  | 4.44116700  | -2.81482800 |   |            |             |            |
| C | 0.96424300  | 4.17708600  | -3.06565500 |   |            |             |            |
| C | 0.40845000  | 2.98401700  | -2.61830600 |   |            |             |            |
| O | 2.95796200  | 5.56537900  | -3.20316300 |   |            |             |            |
| C | 2.21753800  | 6.53524000  | -3.91562300 |   |            |             |            |
| H | 3.15666100  | 1.58879500  | -1.18614300 |   |            |             |            |
| H | 4.14523500  | 3.72452500  | -1.96916200 |   |            |             |            |
| H | 0.34637800  | 4.88558400  | -3.60378600 |   |            |             |            |
| H | -0.63460900 | 2.75504100  | -2.81130000 |   |            |             |            |
| H | 2.91287100  | 7.34577900  | -4.13086600 |   |            |             |            |
| H | 1.83022000  | 6.12621800  | -4.85590700 |   |            |             |            |
| H | 1.38440600  | 6.91808700  | -3.31487700 |   |            |             |            |
| C | 1.09664800  | -1.44658200 | 1.43156300  |   |            |             |            |
| C | 1.48960700  | -2.75327300 | 1.71706100  |   |            |             |            |
| C | 1.20151600  | -0.46057200 | 2.41753100  |   |            |             |            |
| C | 2.01028800  | -3.06471300 | 2.97060200  |   |            |             |            |
| H | 1.39600100  | -3.52671800 | 0.96181500  |   |            |             |            |
| C | 1.72481600  | -0.77719300 | 3.66645300  |   |            |             |            |
| H | 0.83296700  | 0.54144100  | 2.21904900  |   |            |             |            |
| C | 2.13555500  | -2.07878400 | 3.94412800  |   |            |             |            |
| H | 2.31890100  | -4.08333600 | 3.18224200  |   |            |             |            |
| H | 1.80106100  | -0.00632500 | 4.42660400  |   |            |             |            |

---

#### 4) Reference

- 1) Frisch, M. J.; Trucks, G. W.; Schlegel, H. B.; Scuseria, G. E.; Robb, M. A.; Cheeseman, J. R.; Scalmani, G.; Barone, V.; Mennucci, B.; Petersson, G. A.; Nakatsuji, H.; Caricato, M.; Li, X.; Hratchian, H. P.; Izmaylov, A. F.; Bloino, J.; Zheng, G.; Sonnenberg, J. L.; Hada, M.; Ehara, M.; Toyota, K.; Fukuda, R.; Hasegawa, J.; Ishida, M.; Nakajima, T.; Honda, Y.; Kitao, O.; Nakai, H.; Vreven, T.; Montgomery, J. A., Jr.; Peralta, J. E.; Ogliaro, F.; Bearpark, M.; Heyd, J. J.; Brothers, E.; Kudin, K. N.; Staroverov, V. N.; Kobayashi, R.; Normand, J.; Raghavachari, K.; Rendell, A.; Burant, J. C.; Iyengar, S. S.; Tomasi, J.; Cossi, M.; Rega, N.; Millam, J. M.; Klene, M.; Knox, J. E.; Cross, J. B.; Bakken, V.; Adamo, C.; Jaramillo, J.; Gomperts, R.; Stratmann, R. E.; Yazyev, O.; Austin, A. J.; Cammi, R.; Pomelli, C.; Ochterski, J. W.; Martin, R. L.; Morokuma, K.; Zakrzewski, V. G.; Voth, G. A.; Salvador, P.; Dannenberg, J. J.; Dapprich, S.; Daniels, A. D.; Farkas, O.; Foresman, J. B.; Ortiz, J. V.; Cioslowski, J.; Fox, D. J. *Gaussian 09*, revision D.01; Gaussian, Inc.: Wallingford, CT, 2009.
- 2) a) Becke, A. D., *Phys. Rev. A* **1988**, *38*, 3098-3100; b) Becke, A. D., *J. Chem. Phys.* **1993**, *98*, 5648-5652; c) Grimme, S.; Ehrlich, S.; Goerigk, L., *J. Comput. Chem.* **2011**, *32*, 1456-1465.
- 3) Marenich, A. V.; Cramer, C. J.; Truhlar, D. G., *J. Phys. Chem. B* **2009**, *113*, 6378-6396.
- 4) Zhao, Y.; Truhlar, D. G., *J. Chem. Phys.* **2006**, *125*, 194101.

## 8. $^1\text{H}$ NMR and $^{13}\text{C}$ NMR spectra

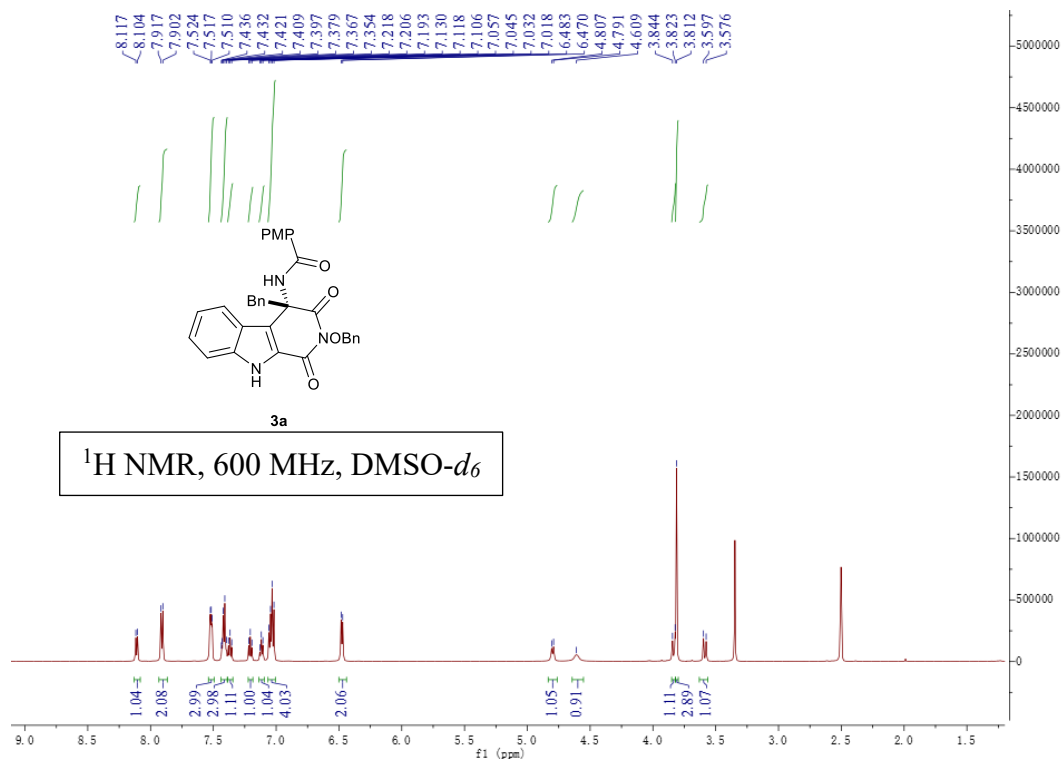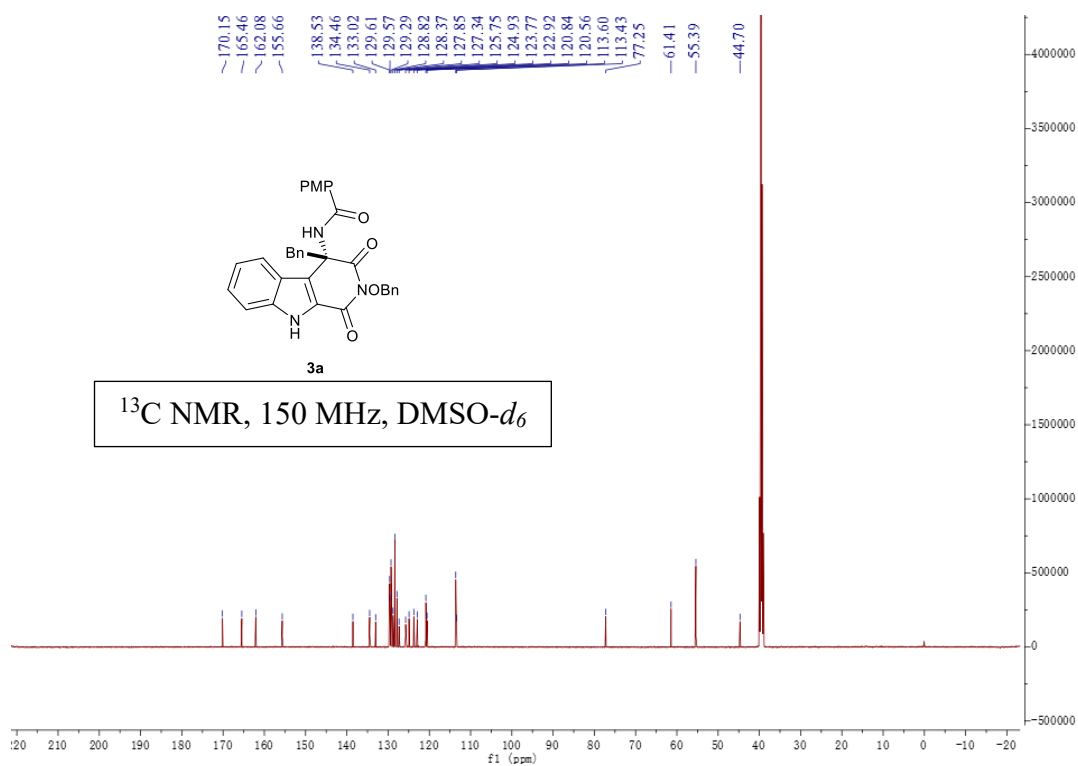

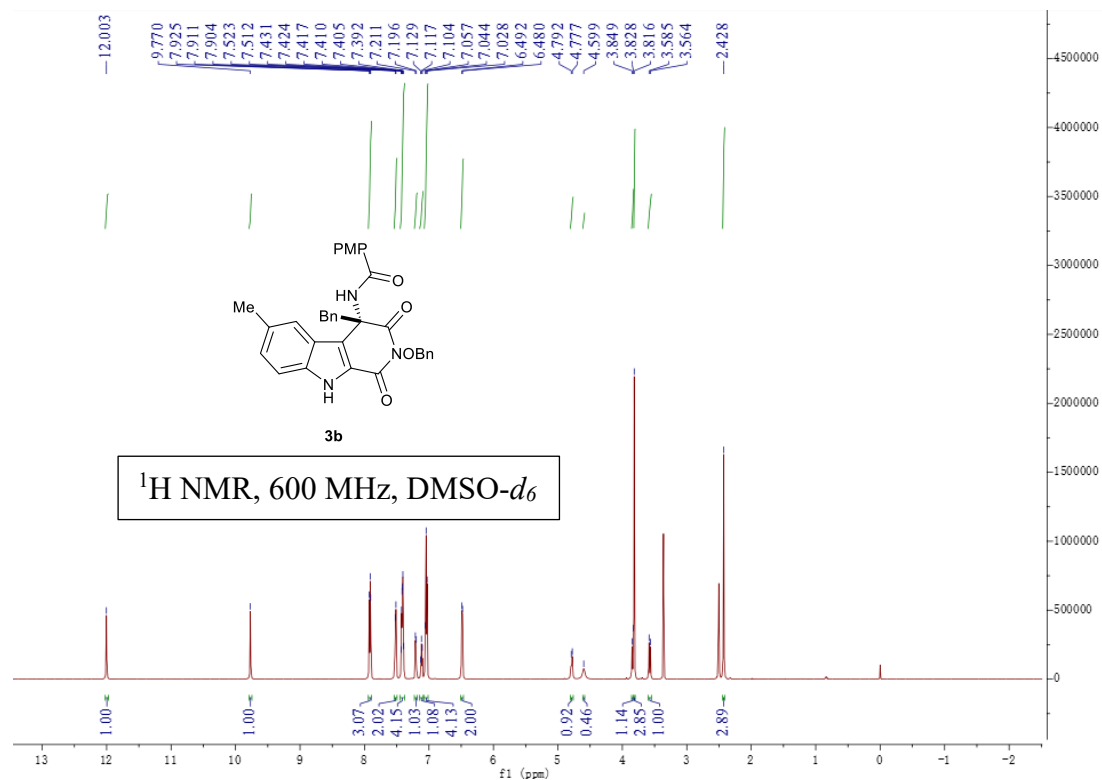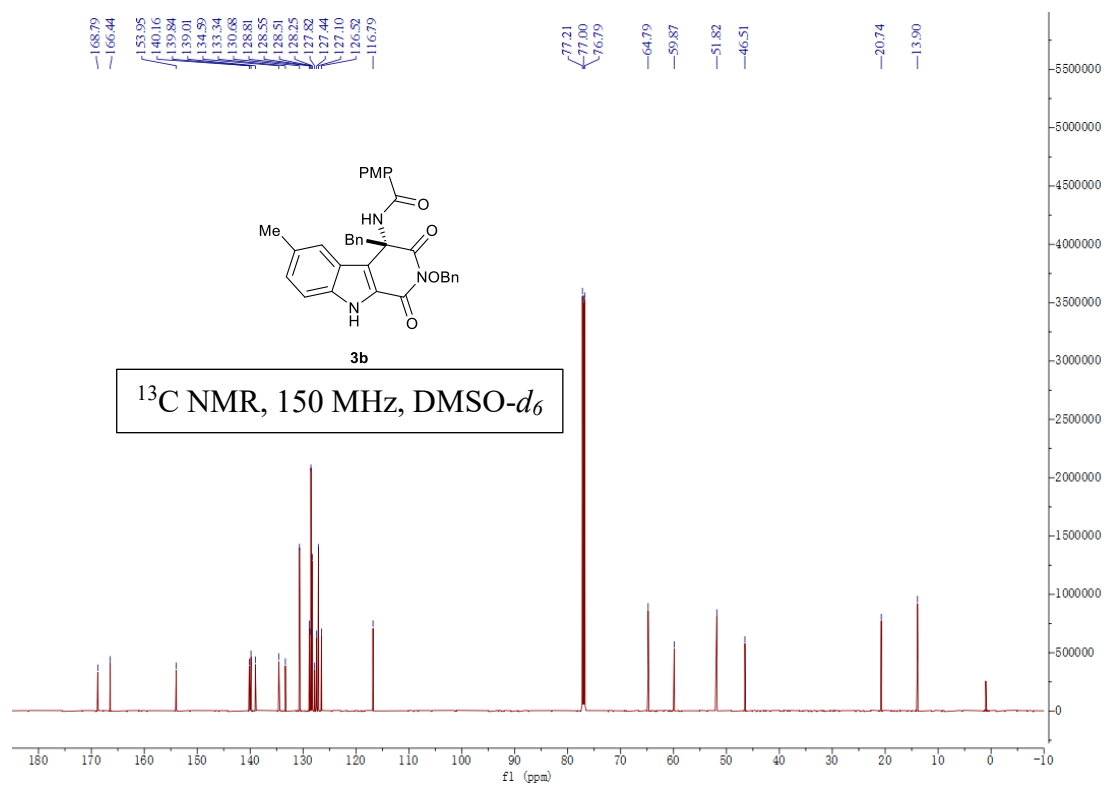

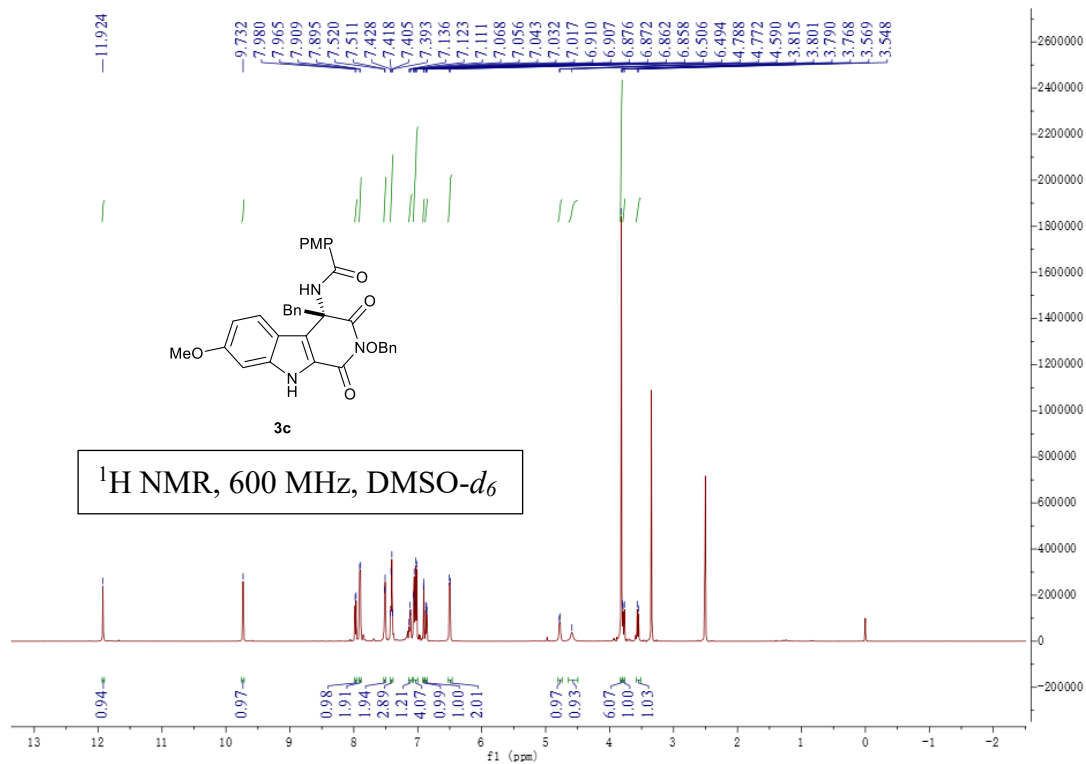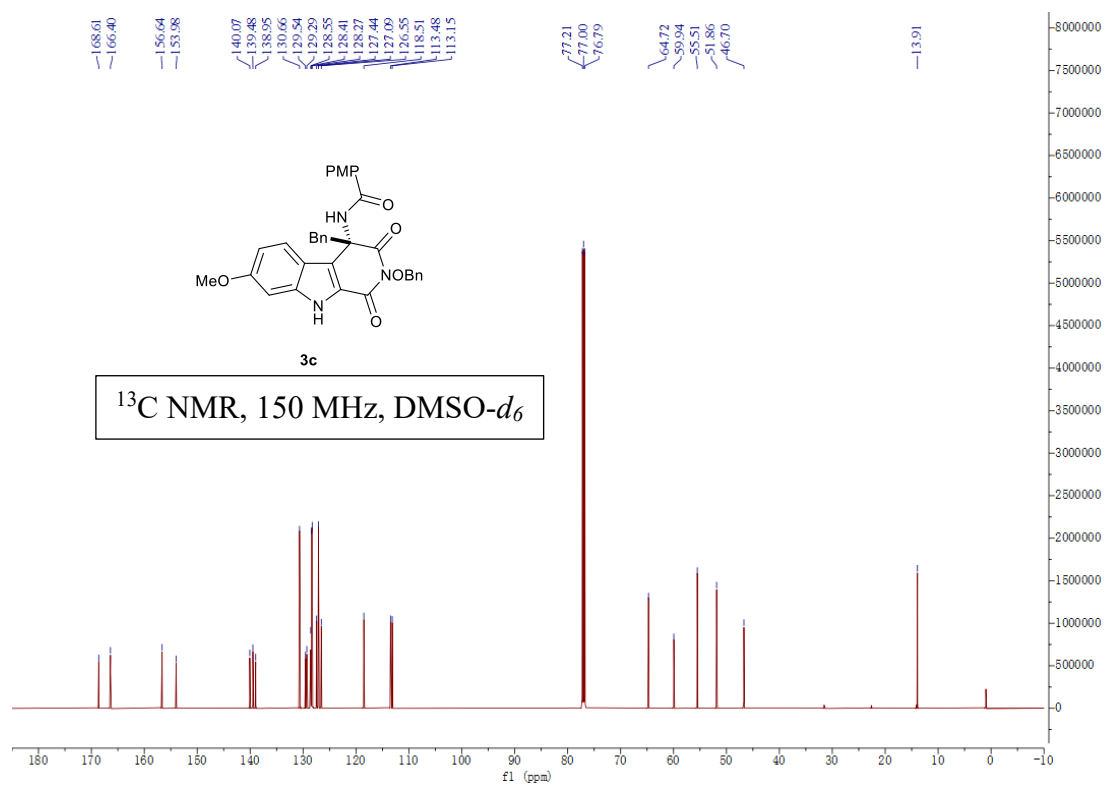

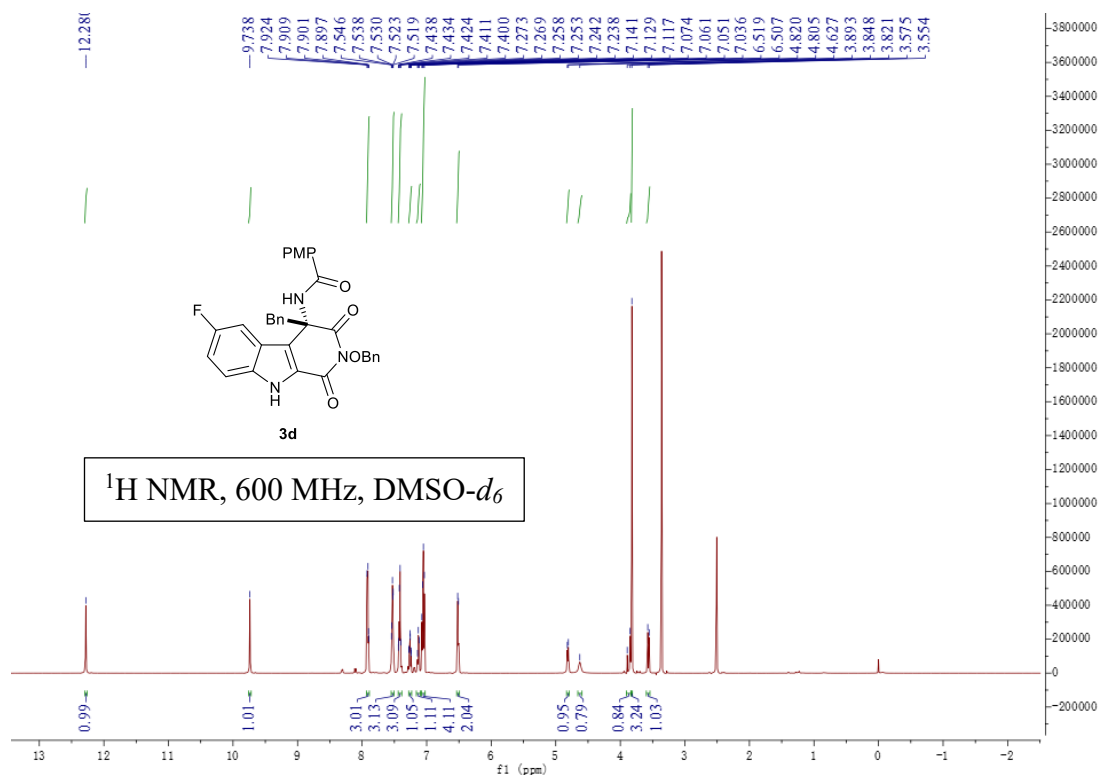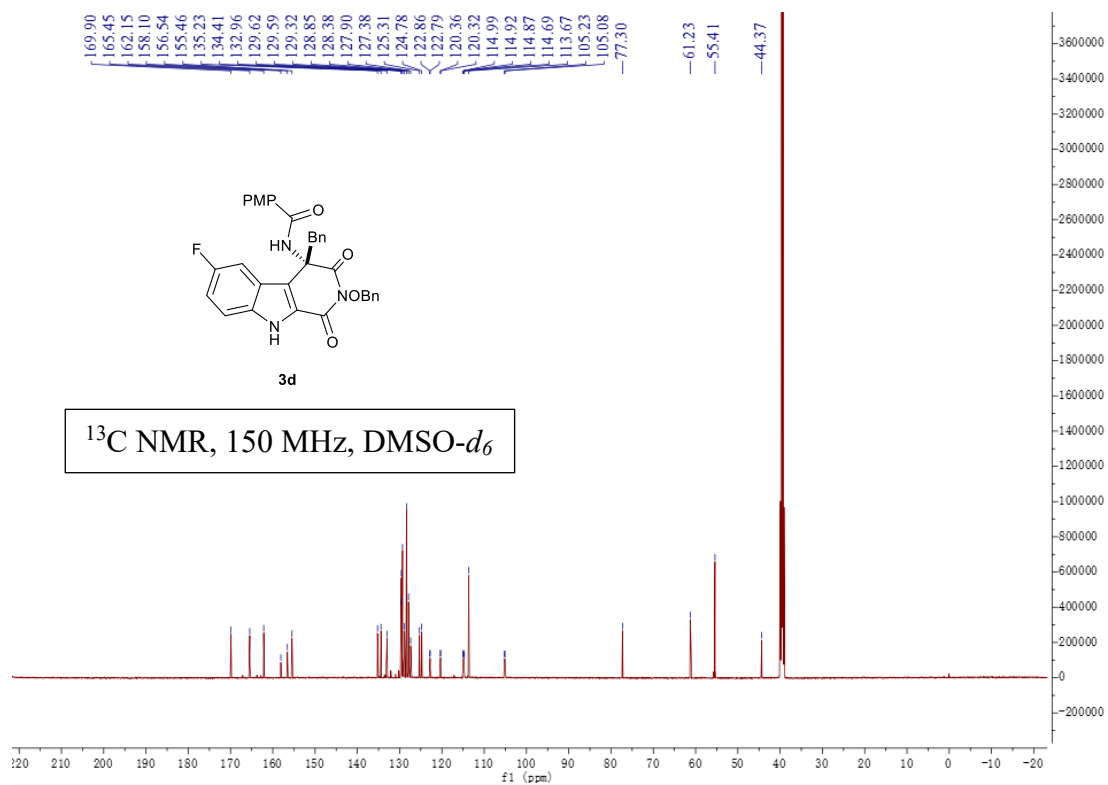

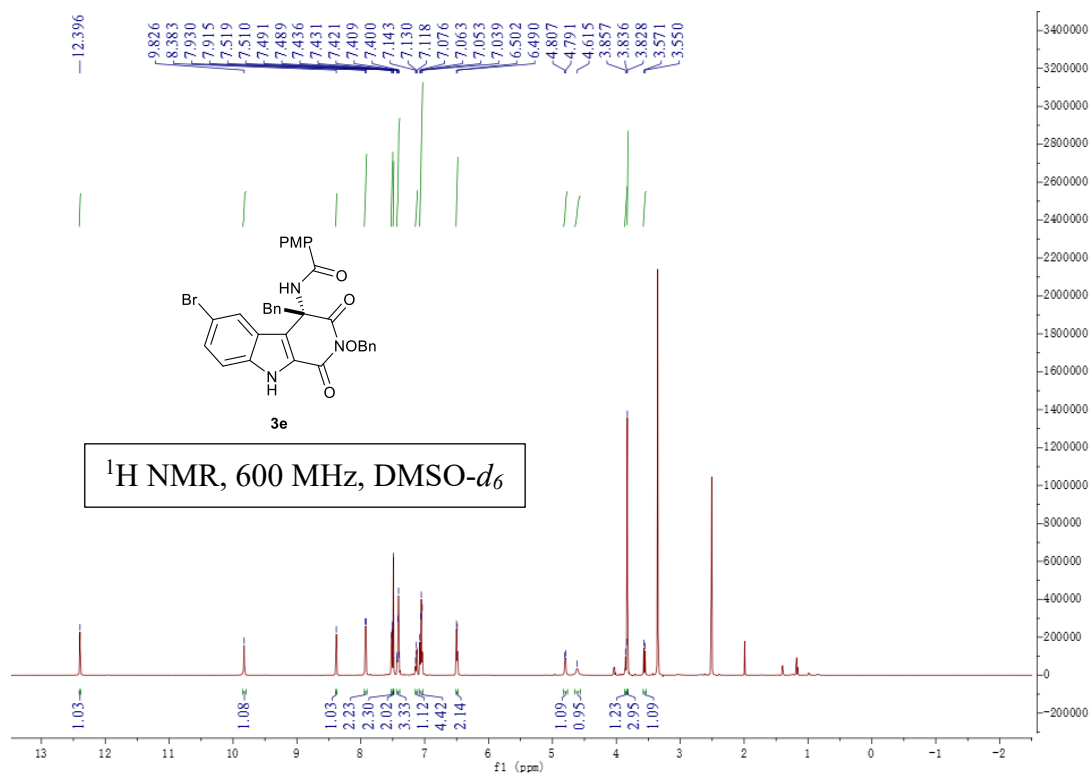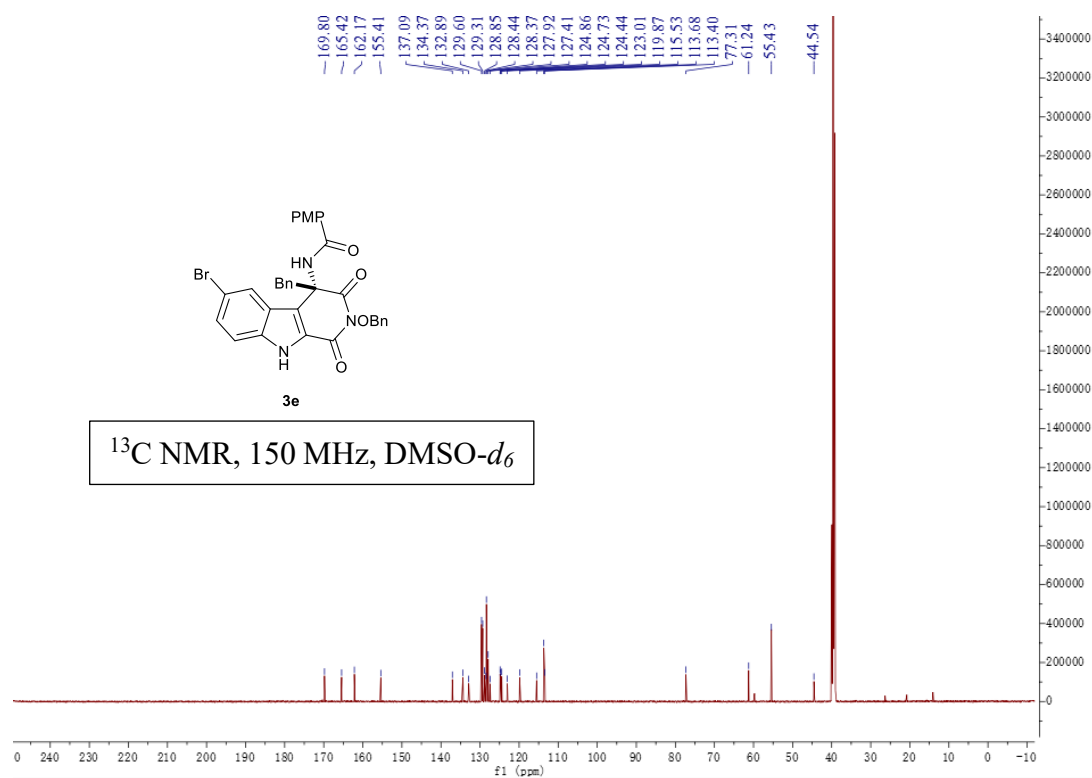



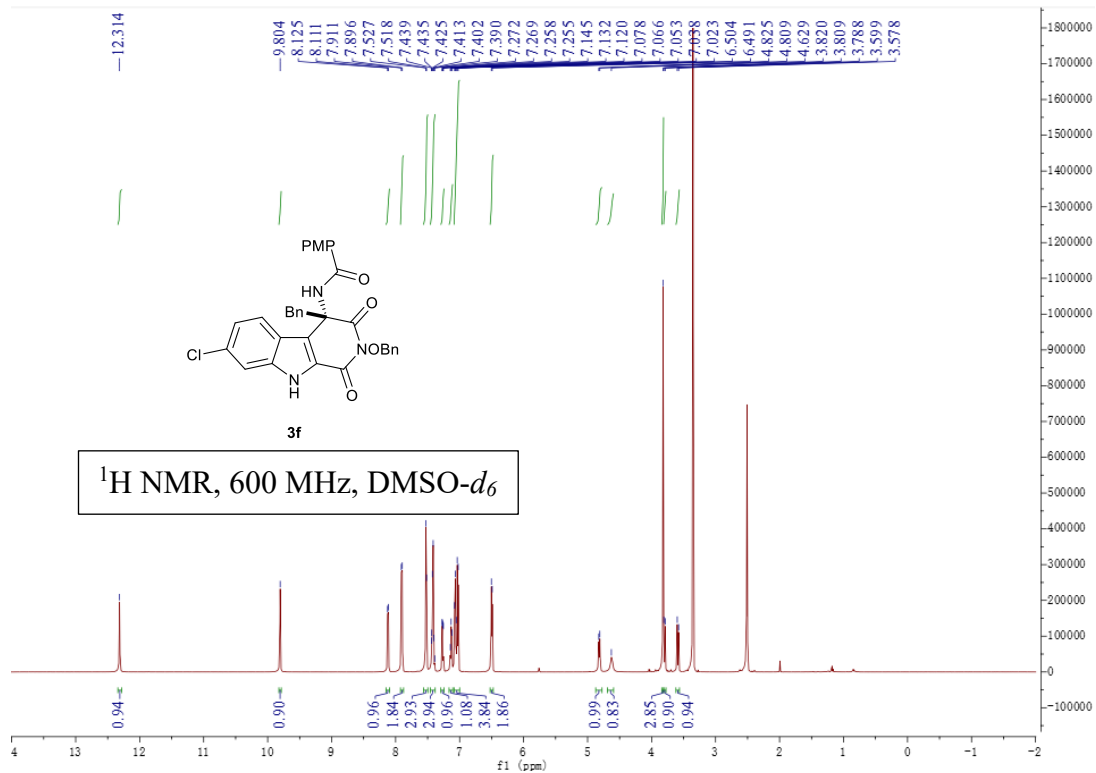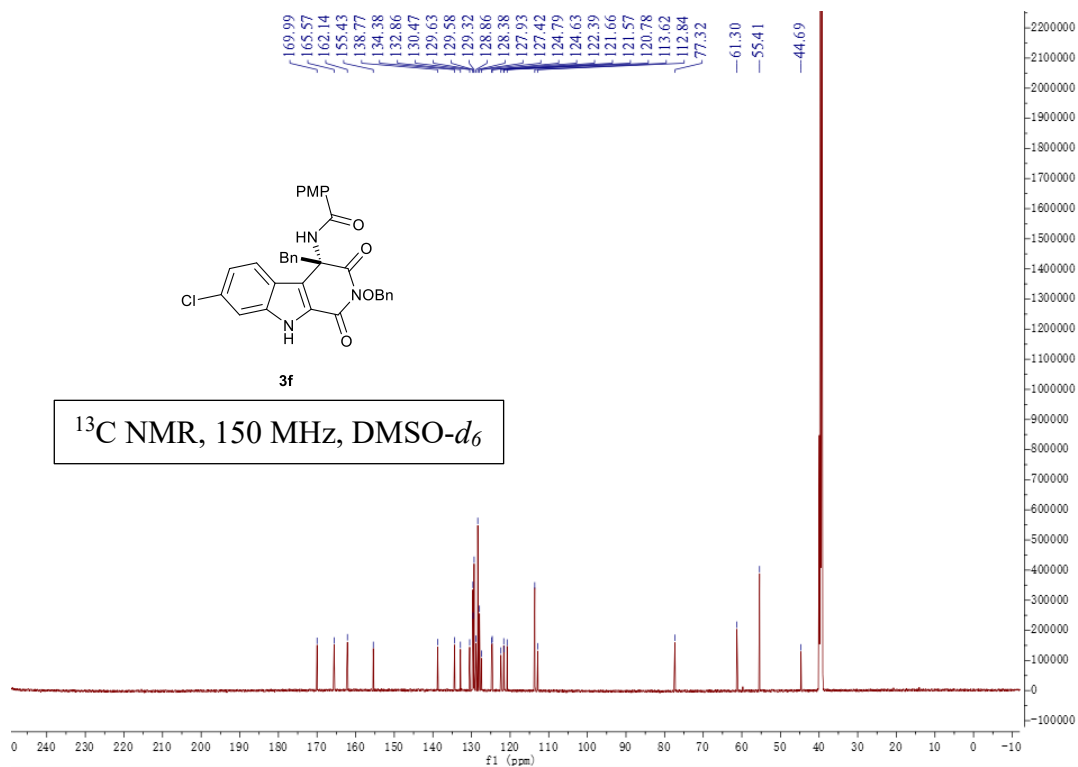

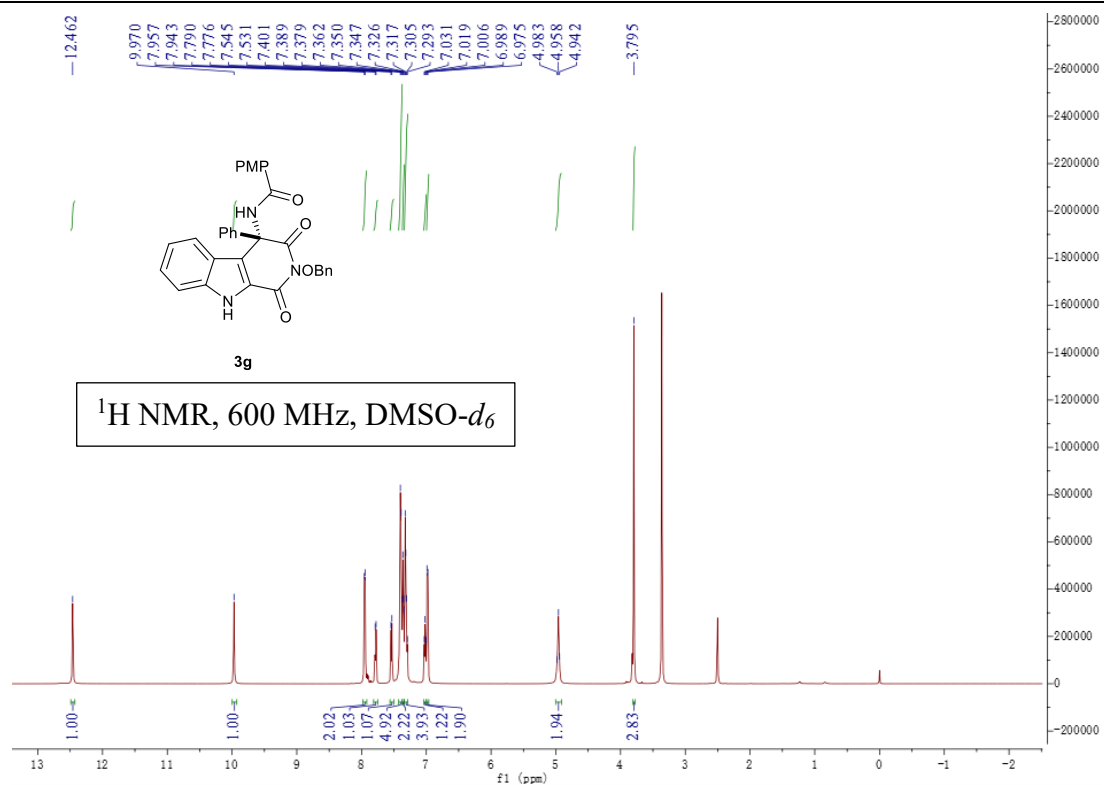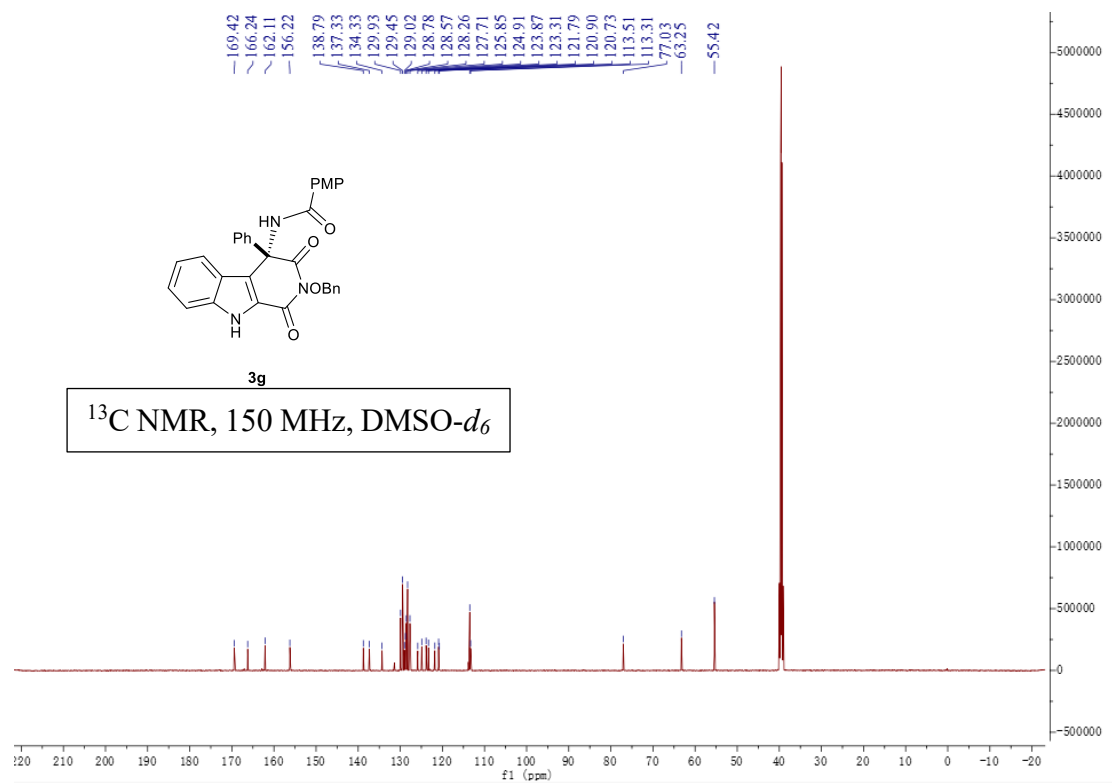

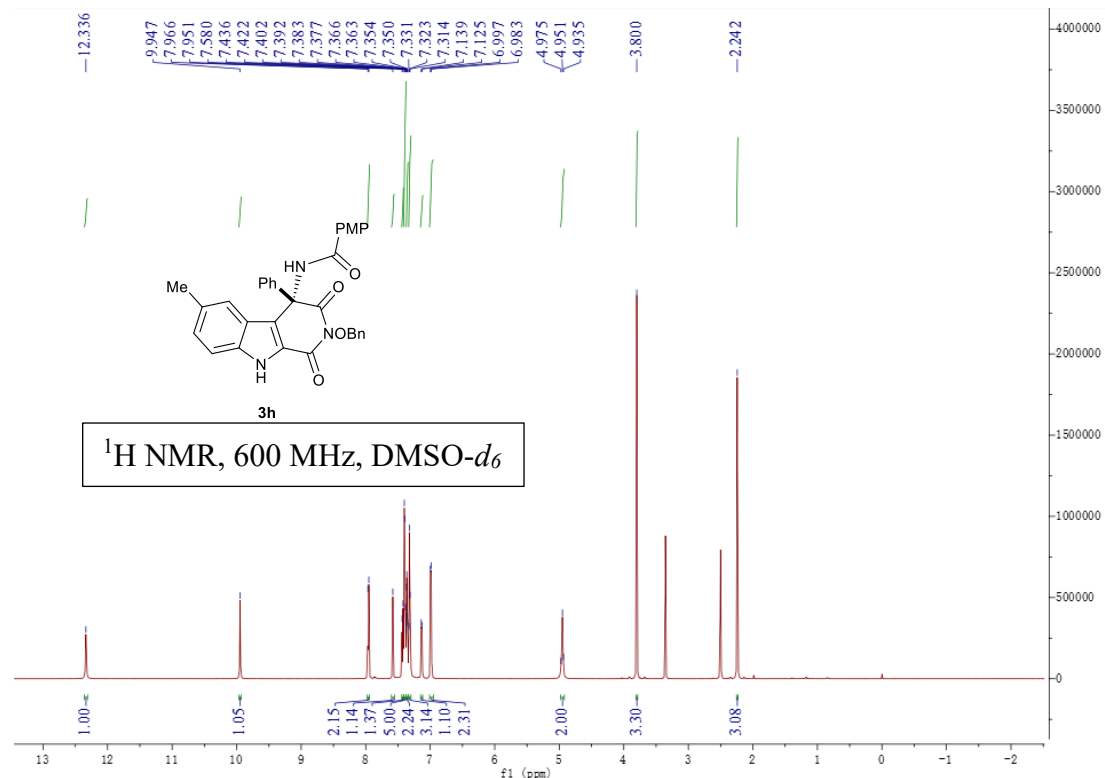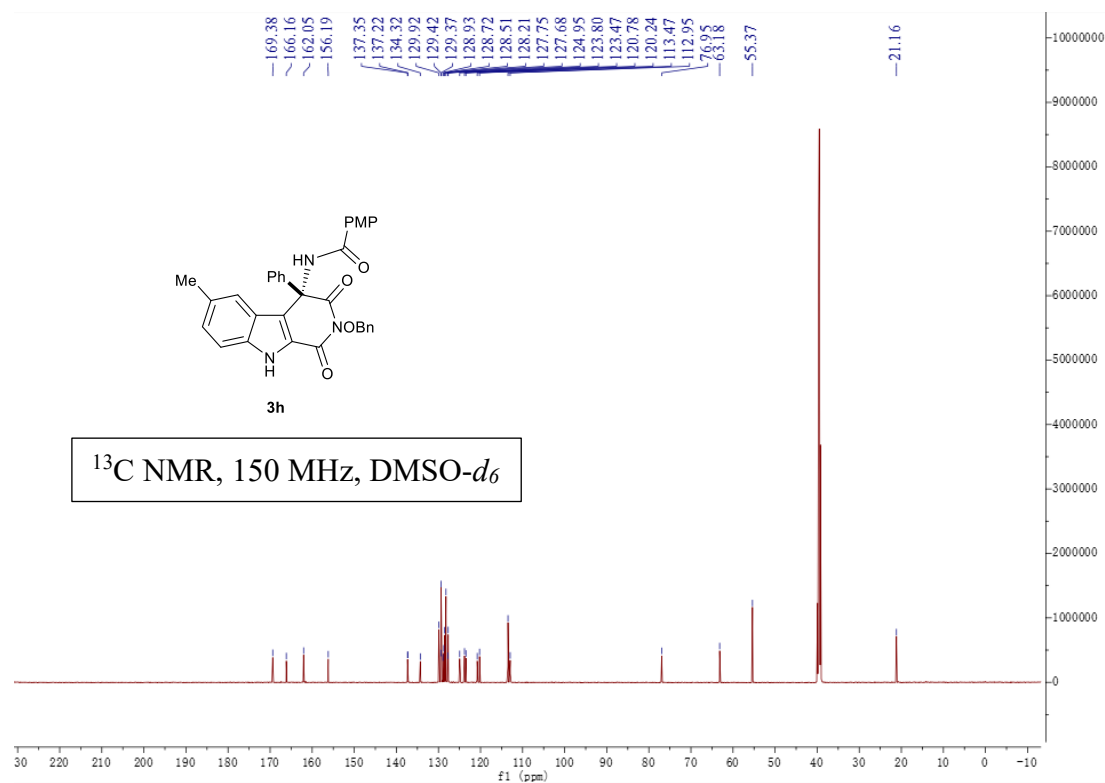

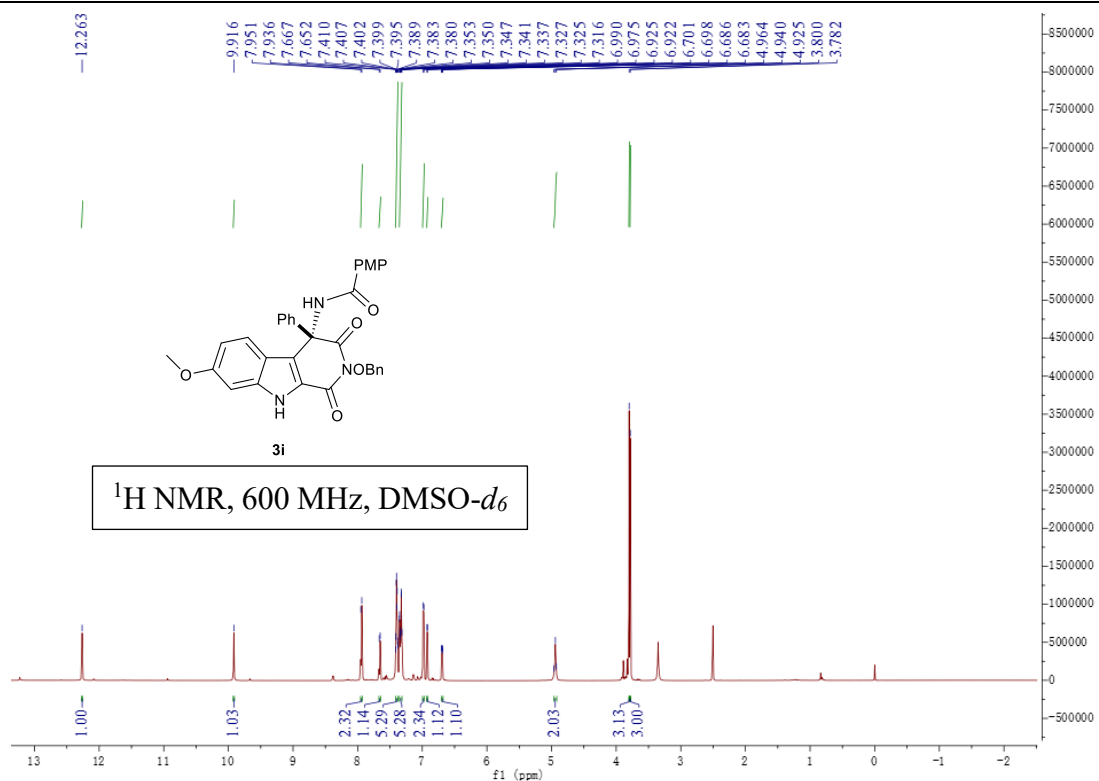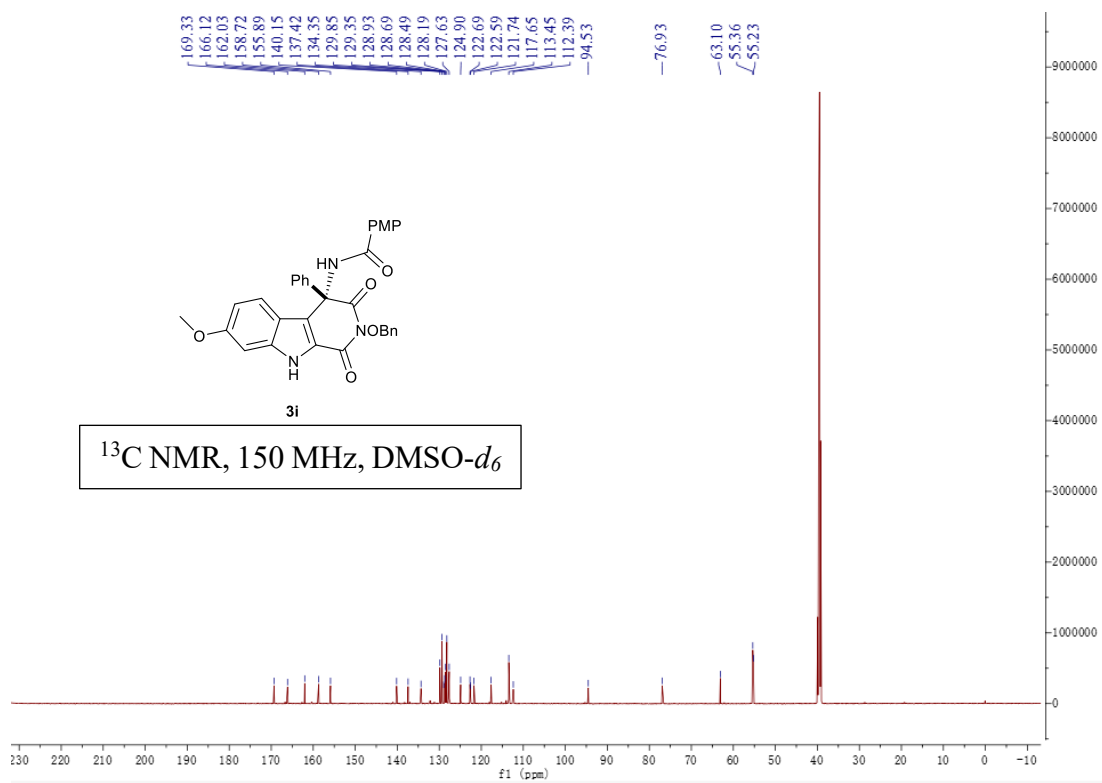

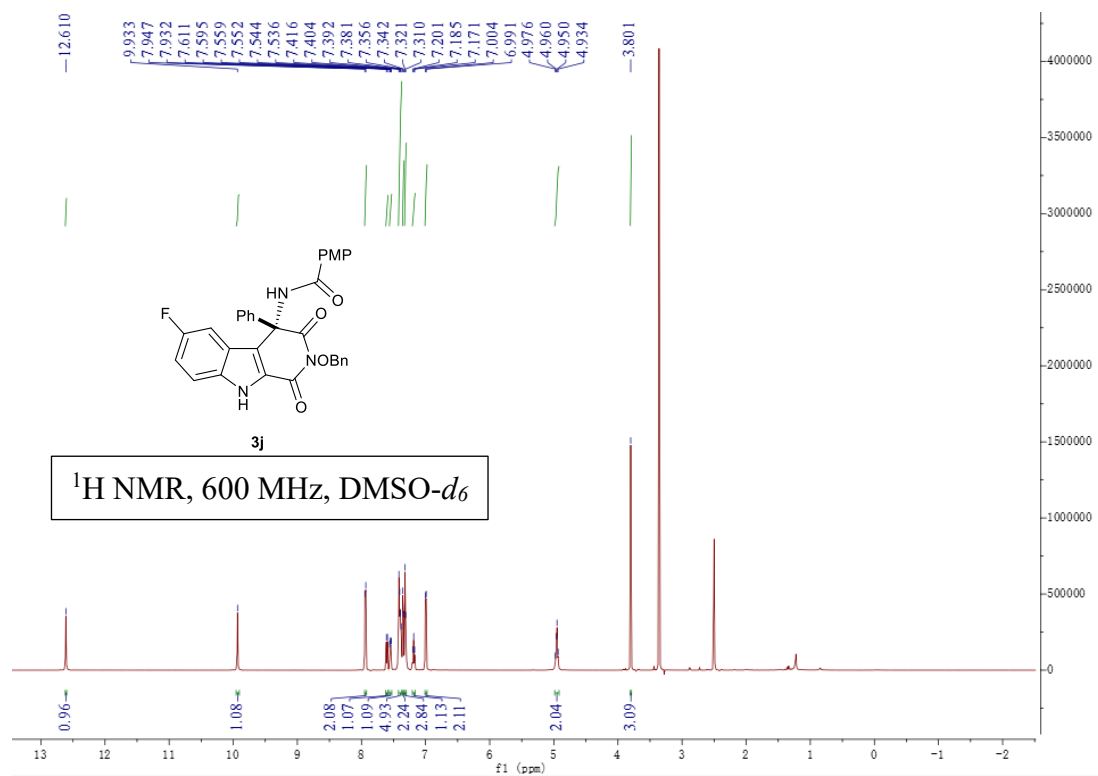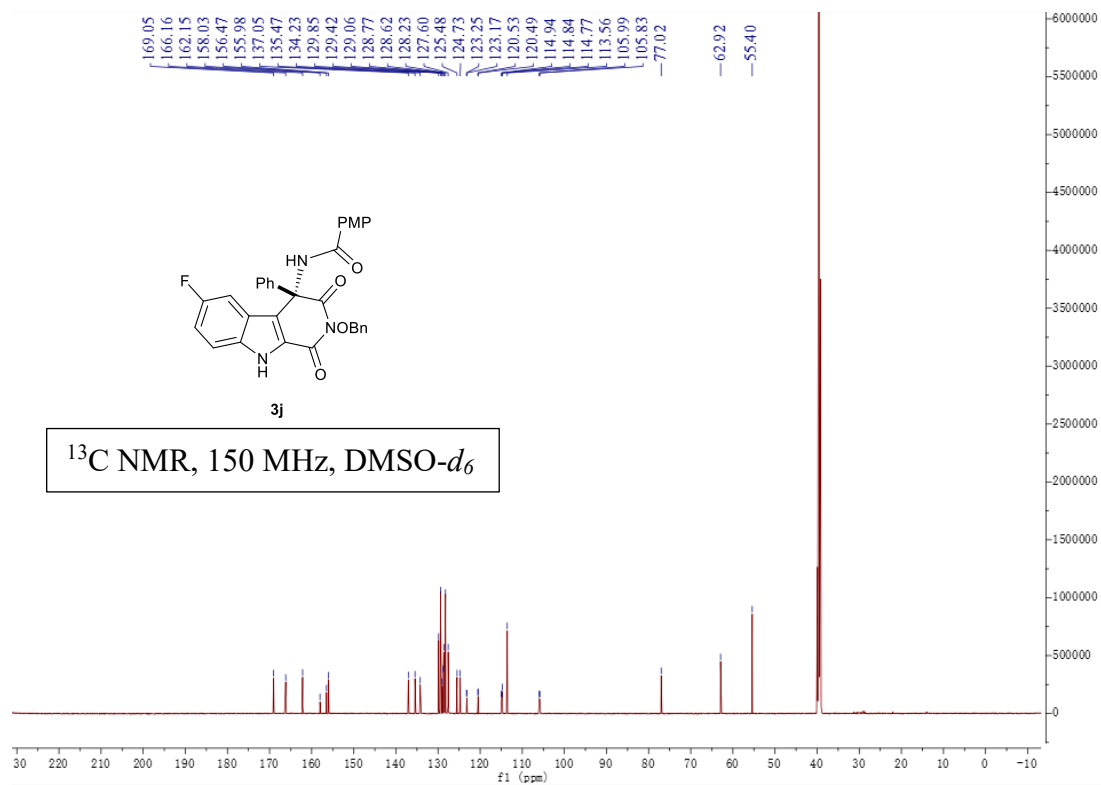

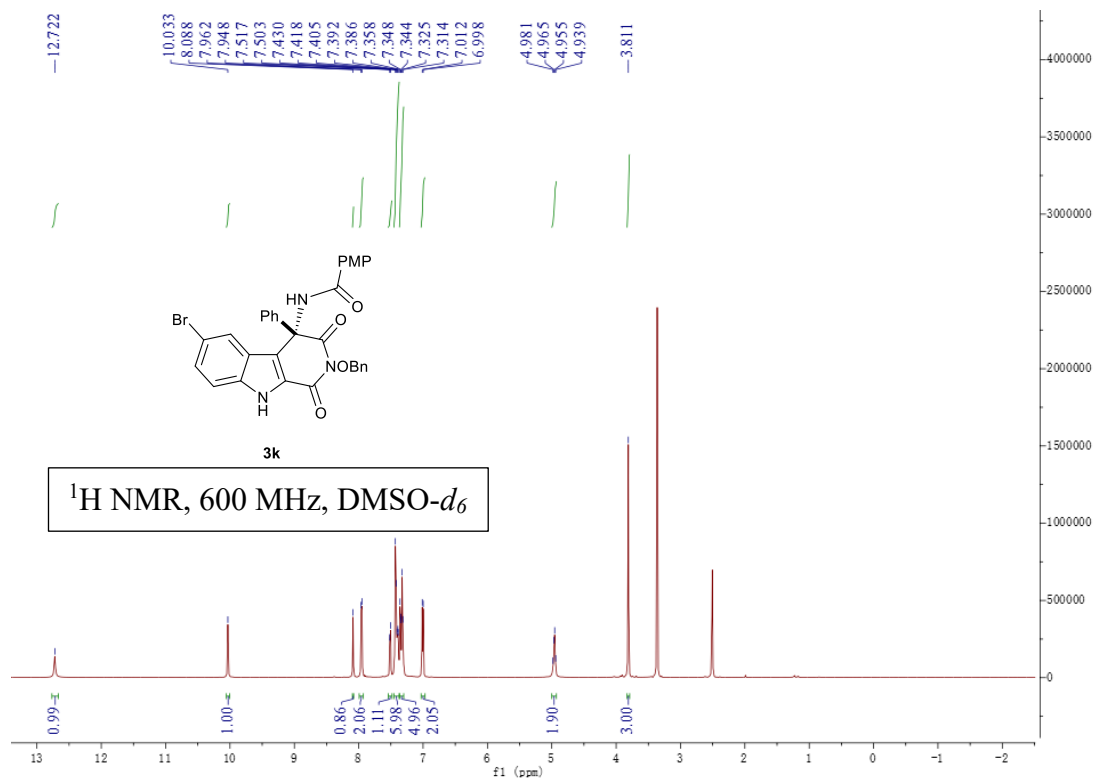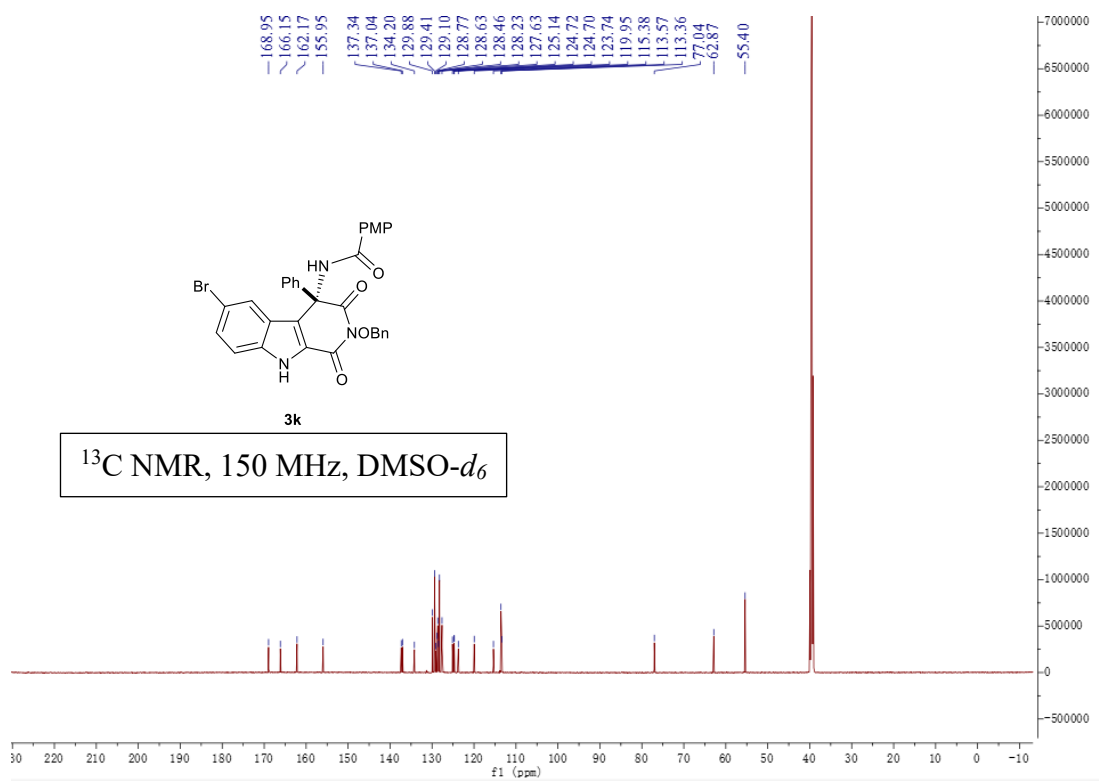

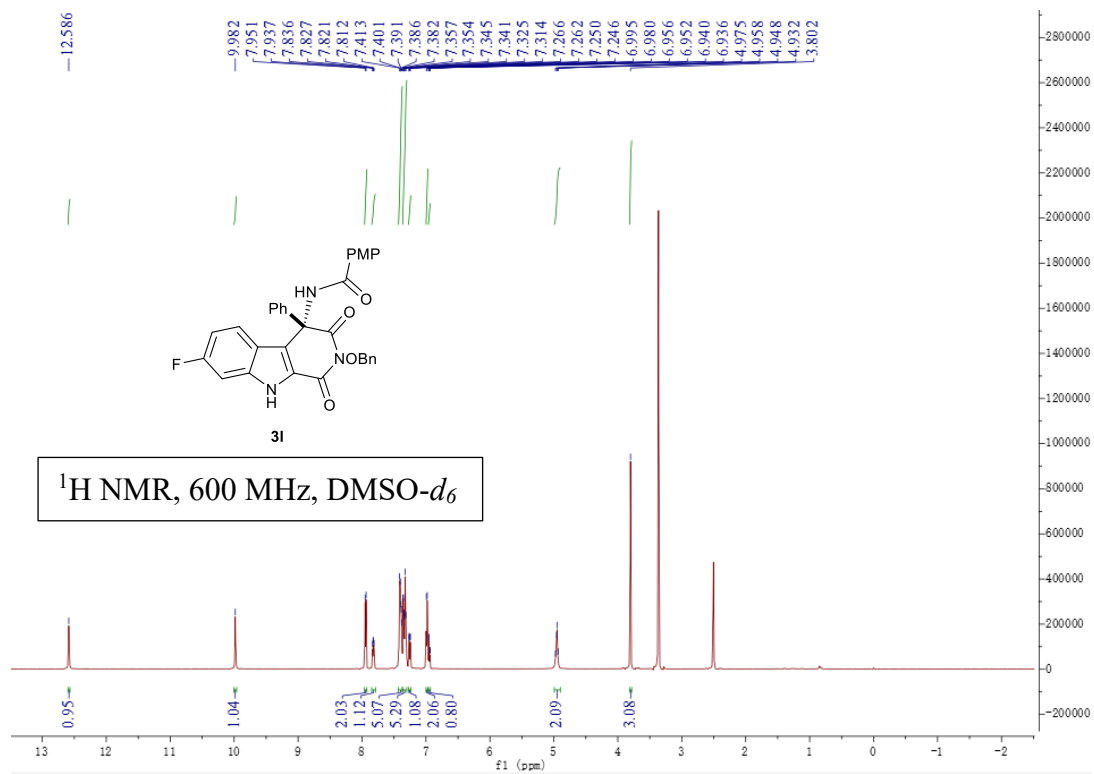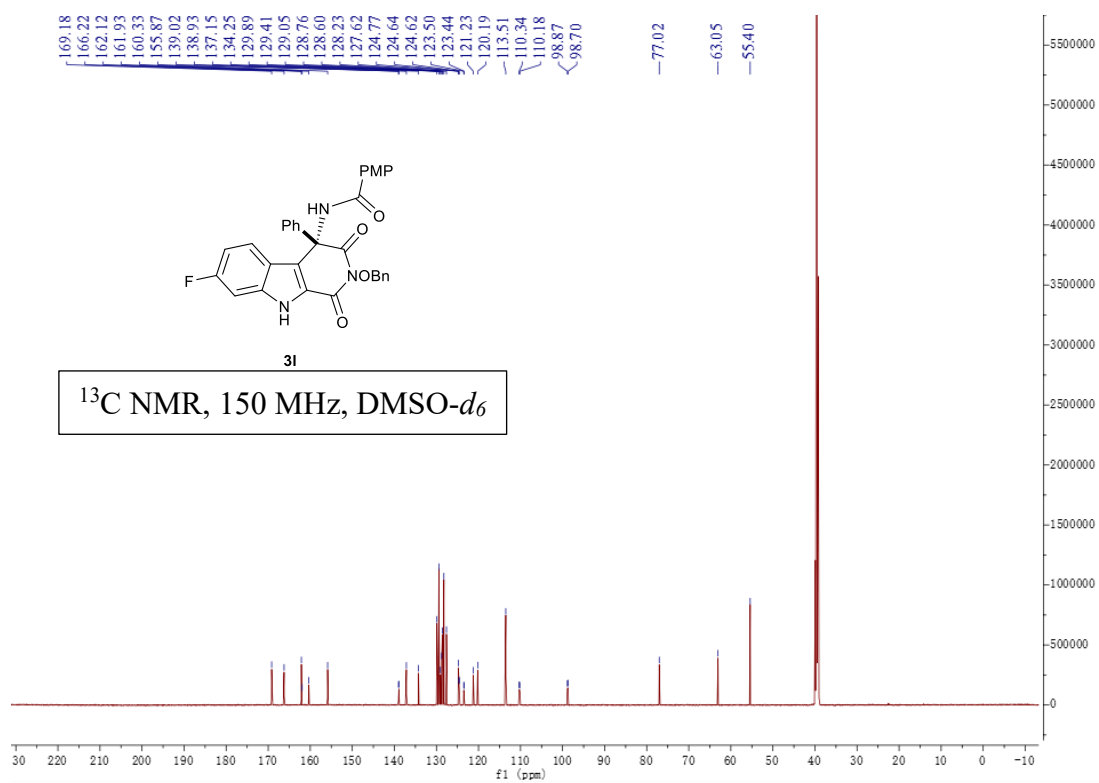

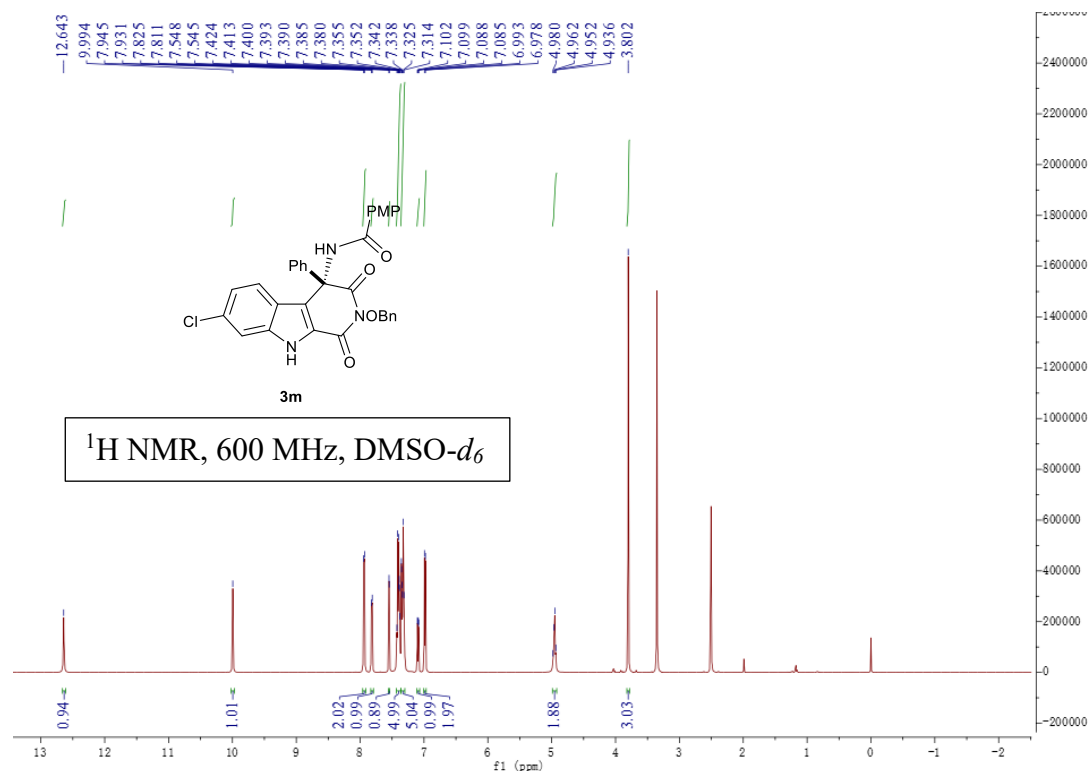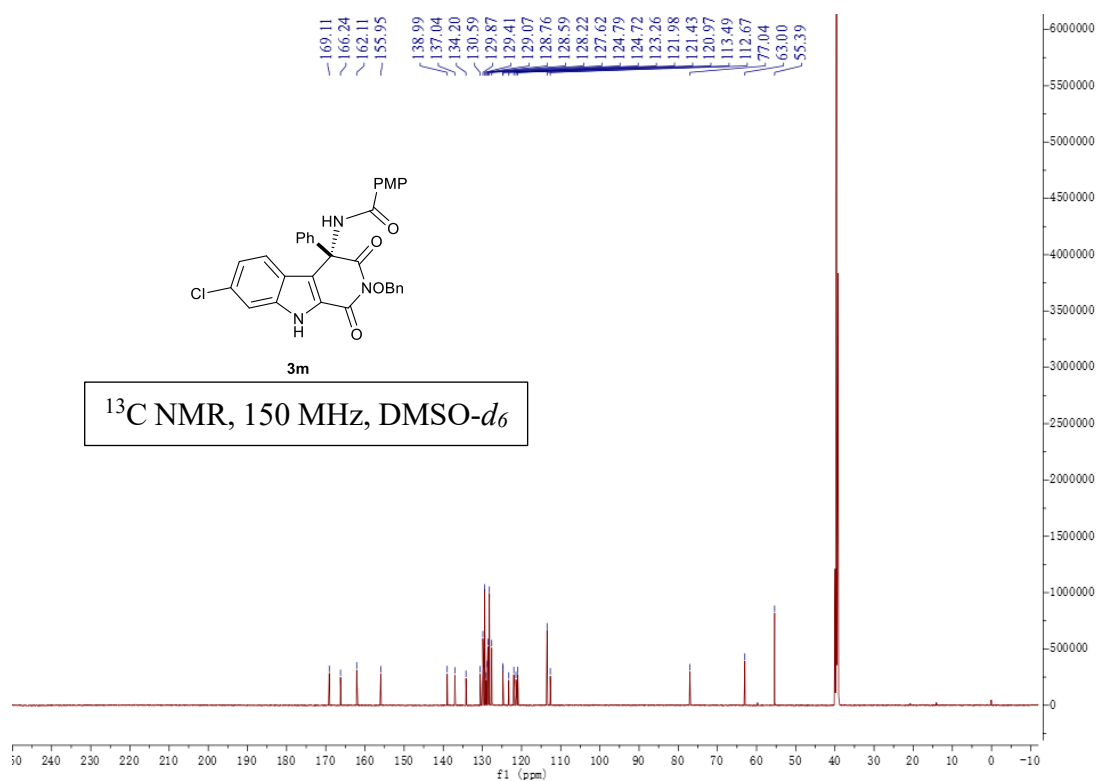



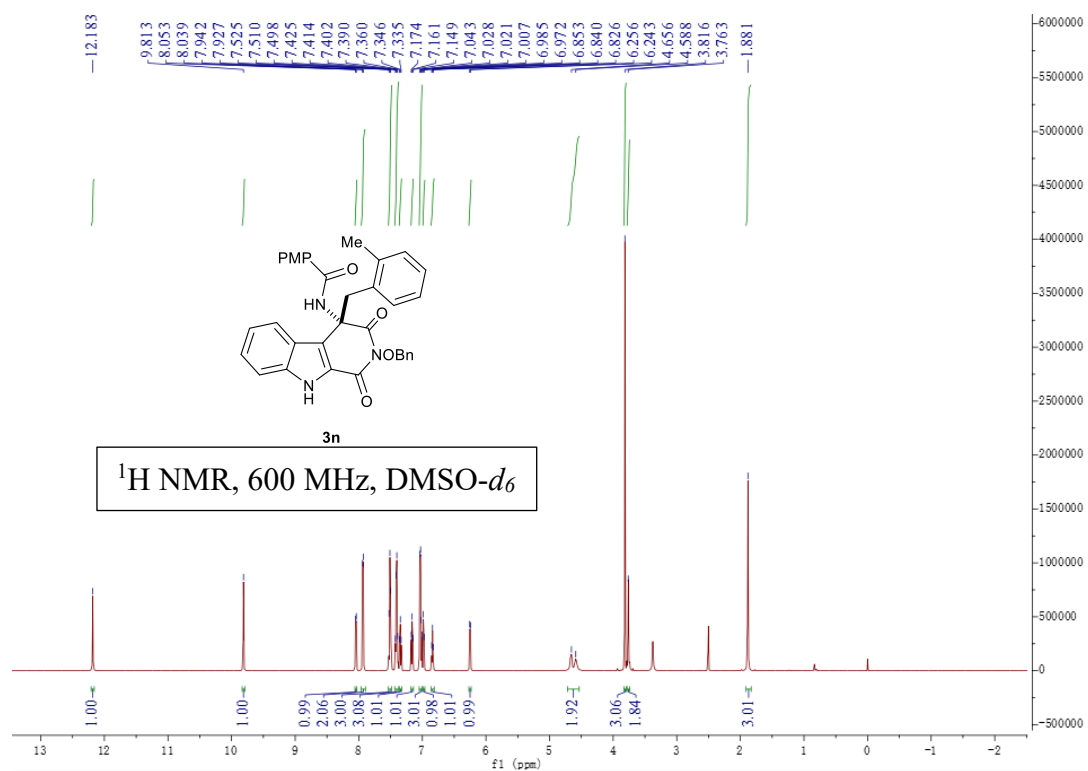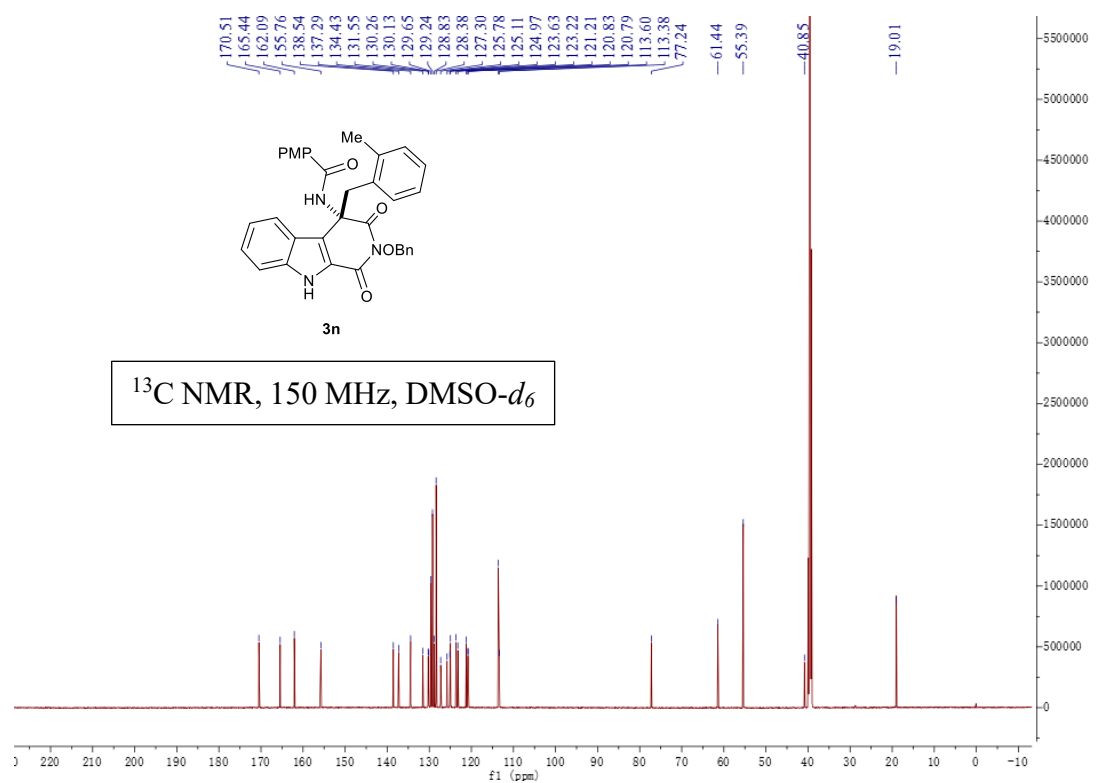

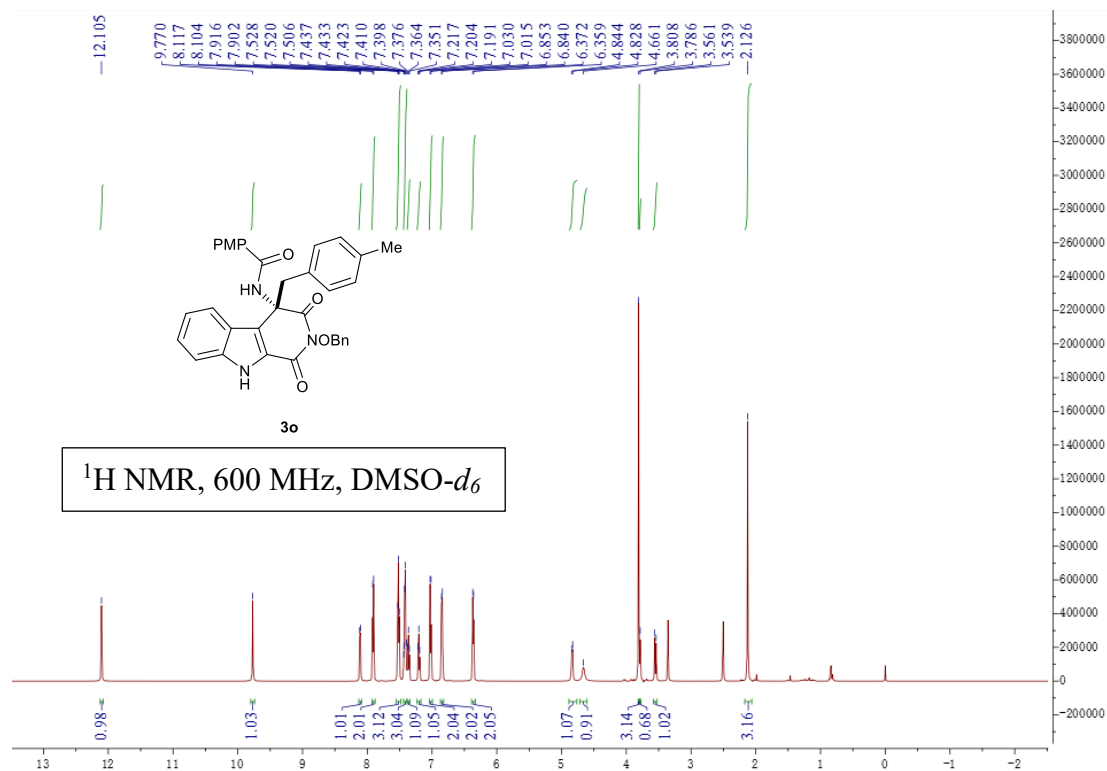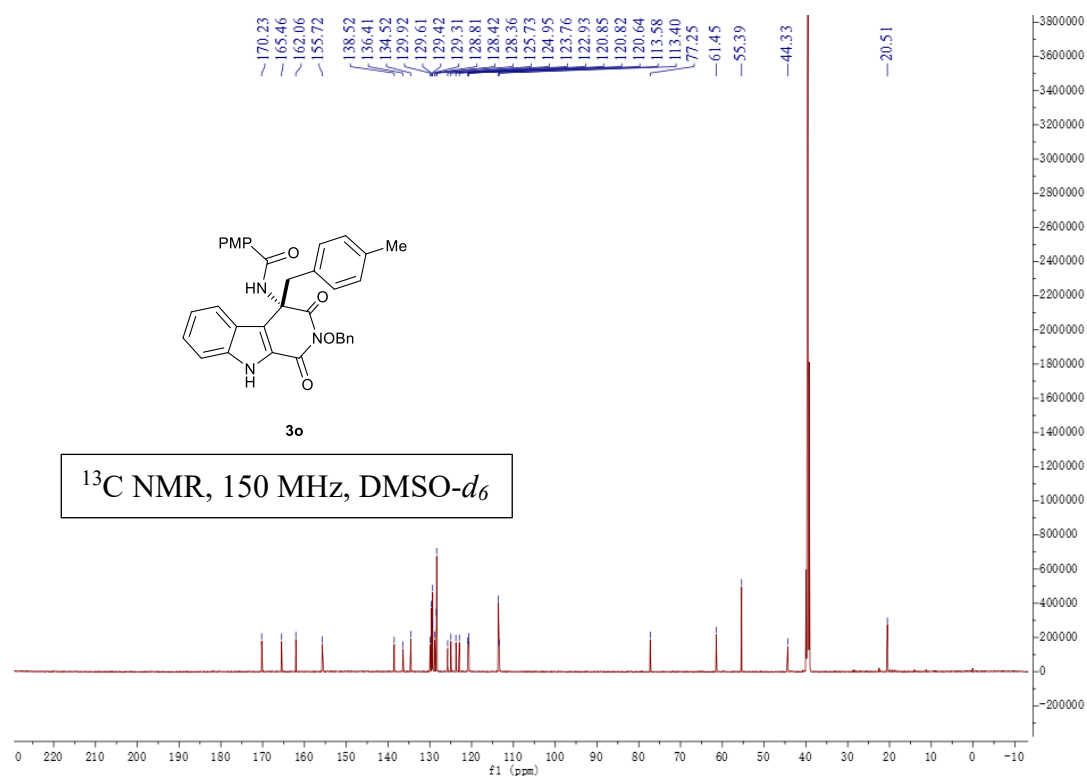

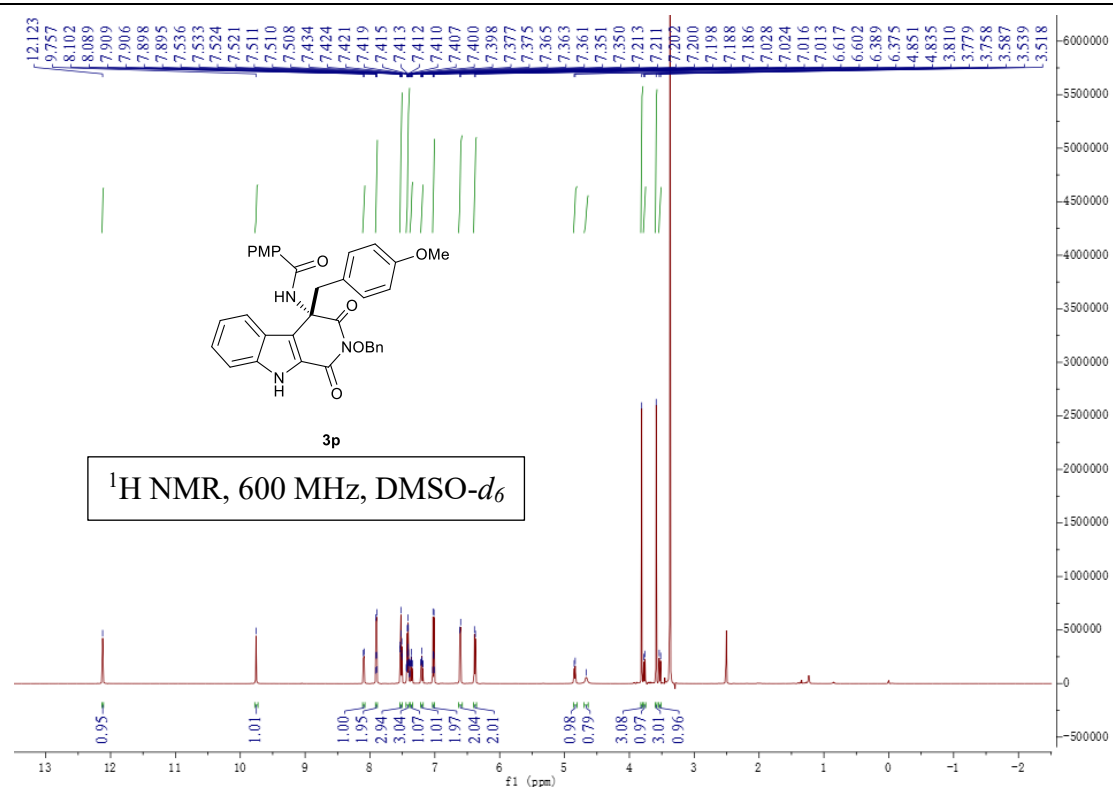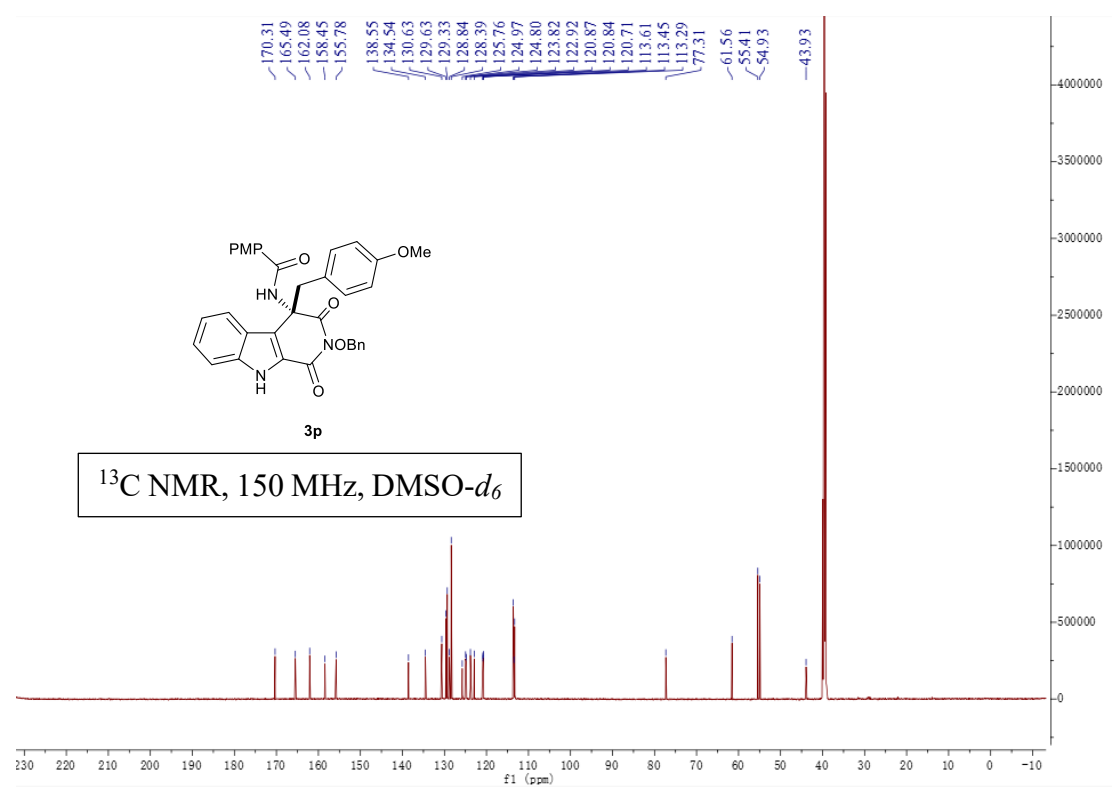

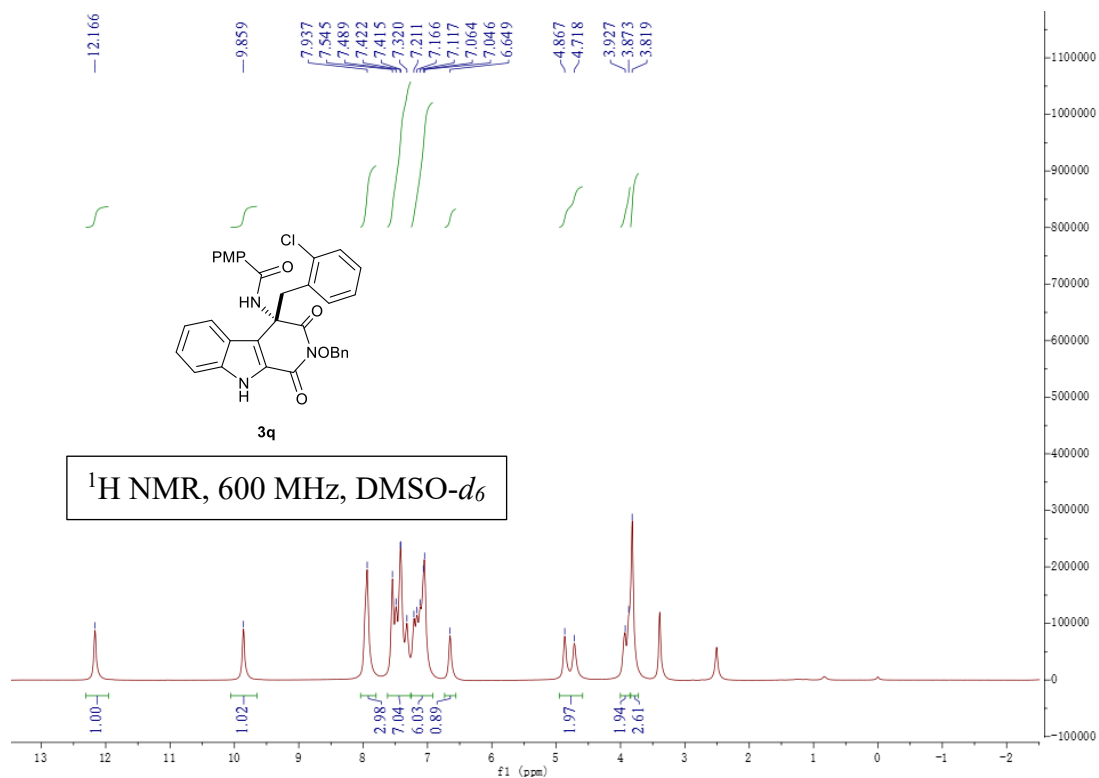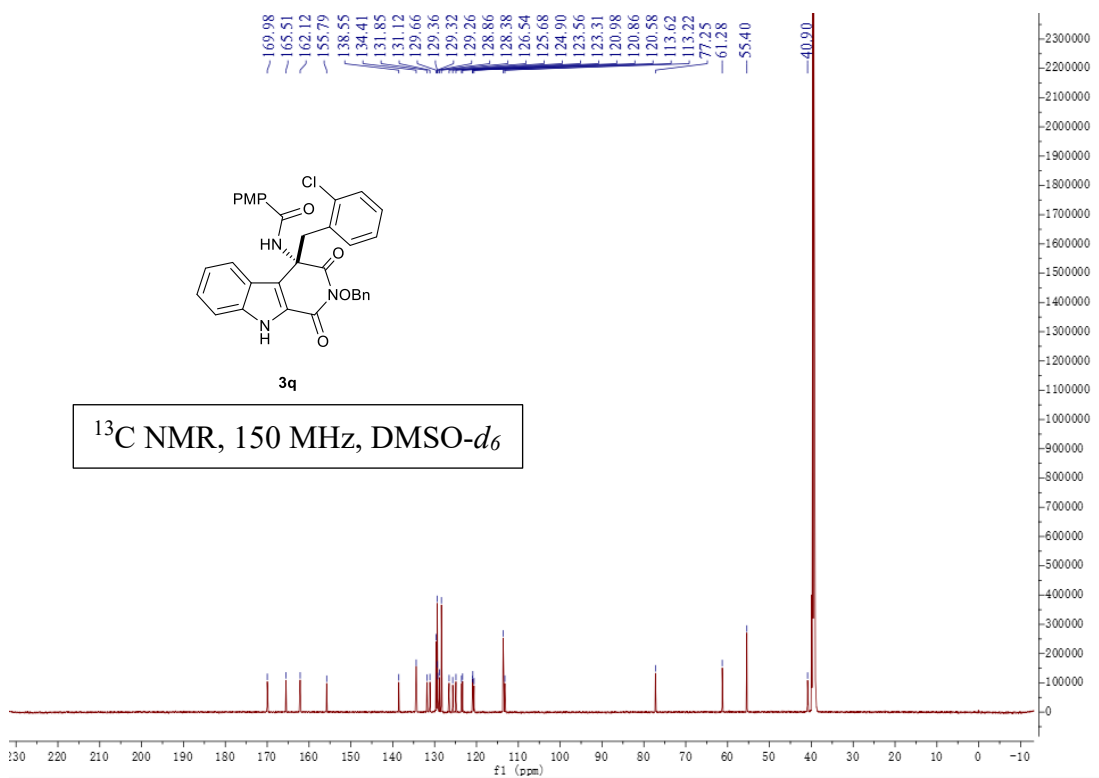

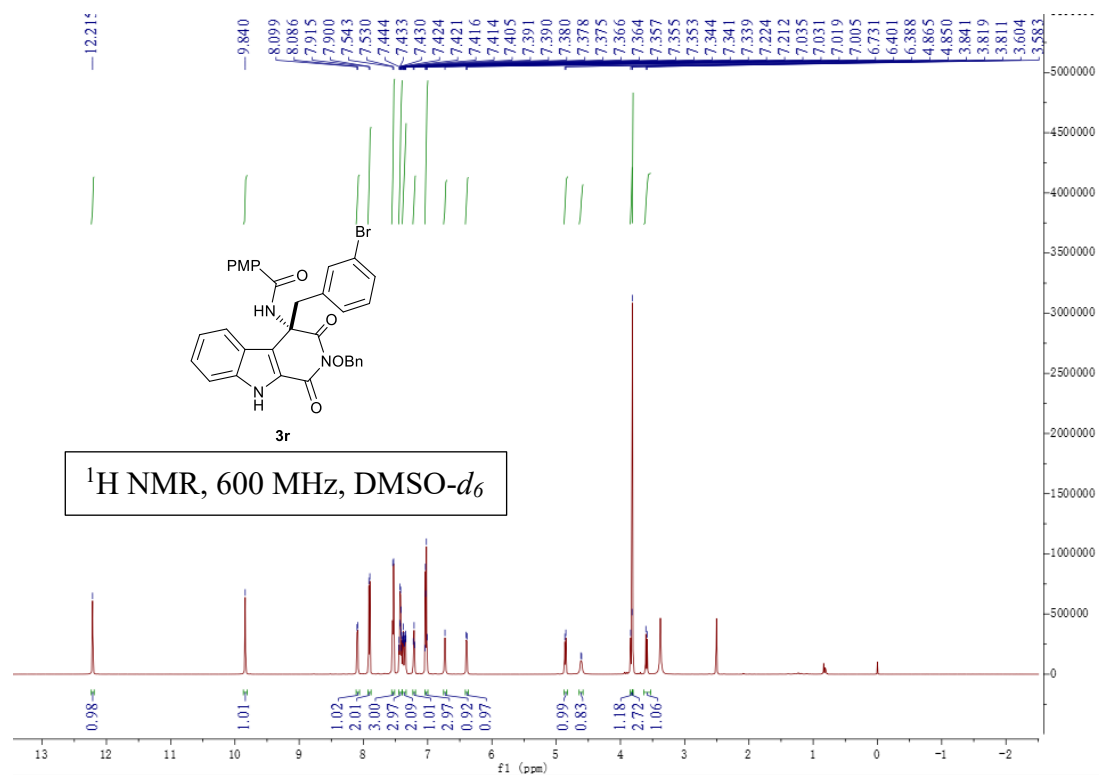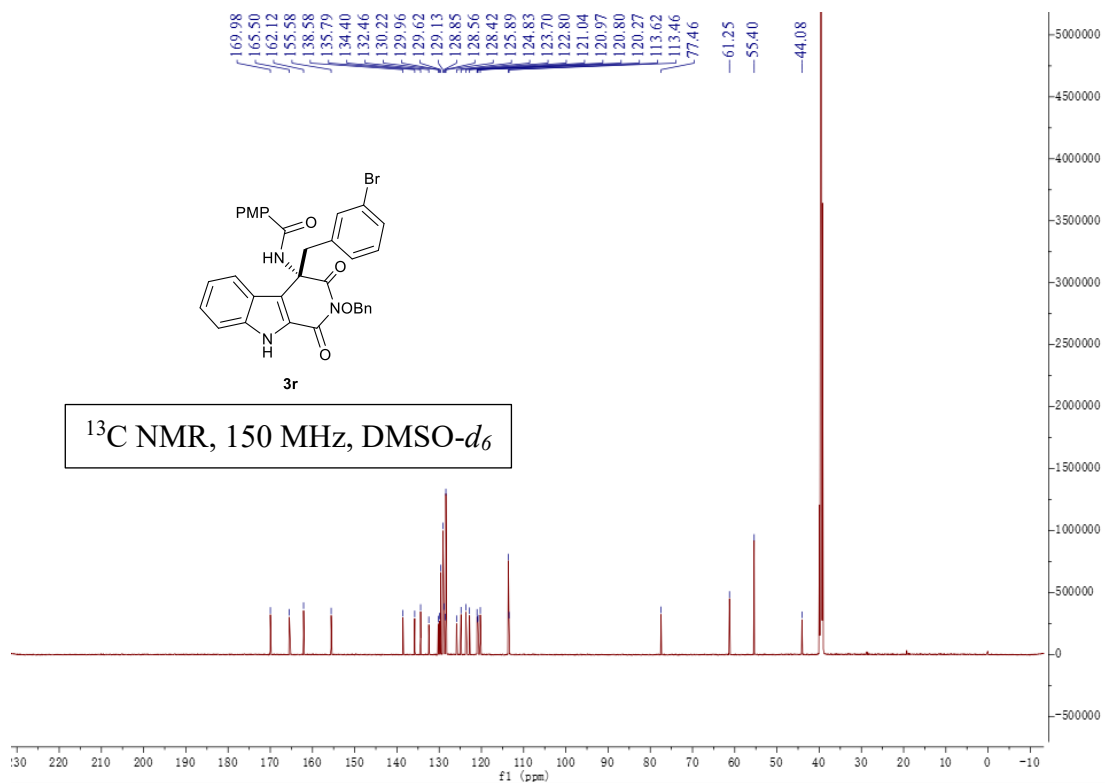

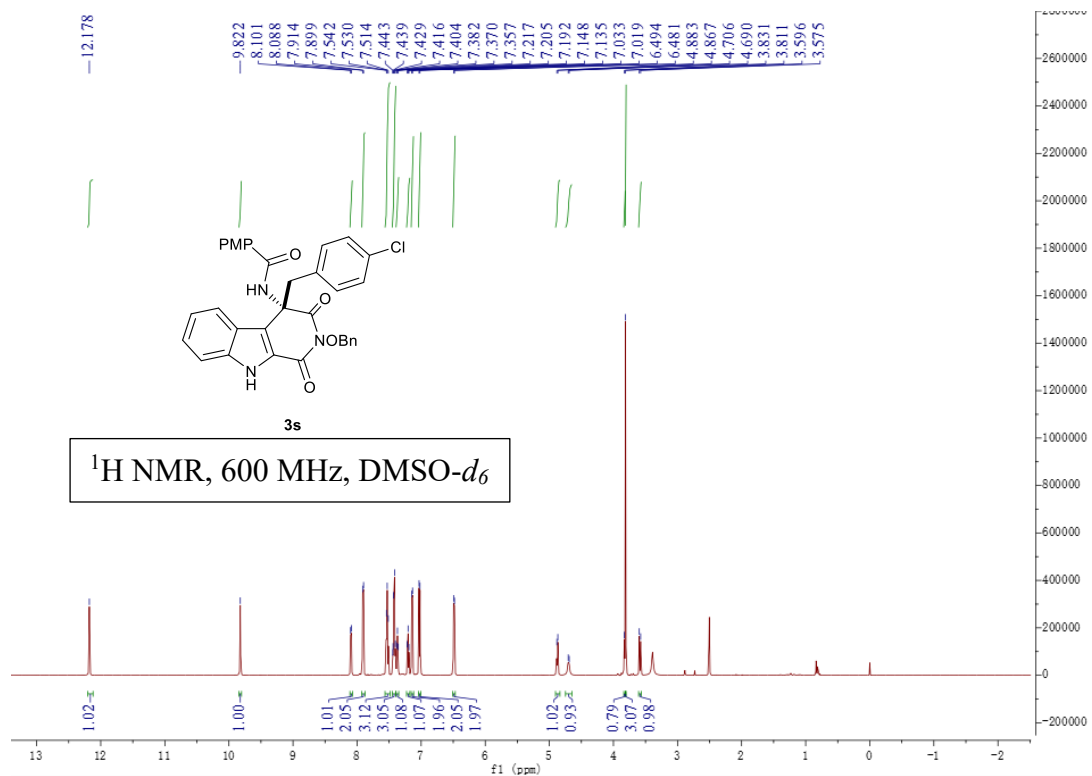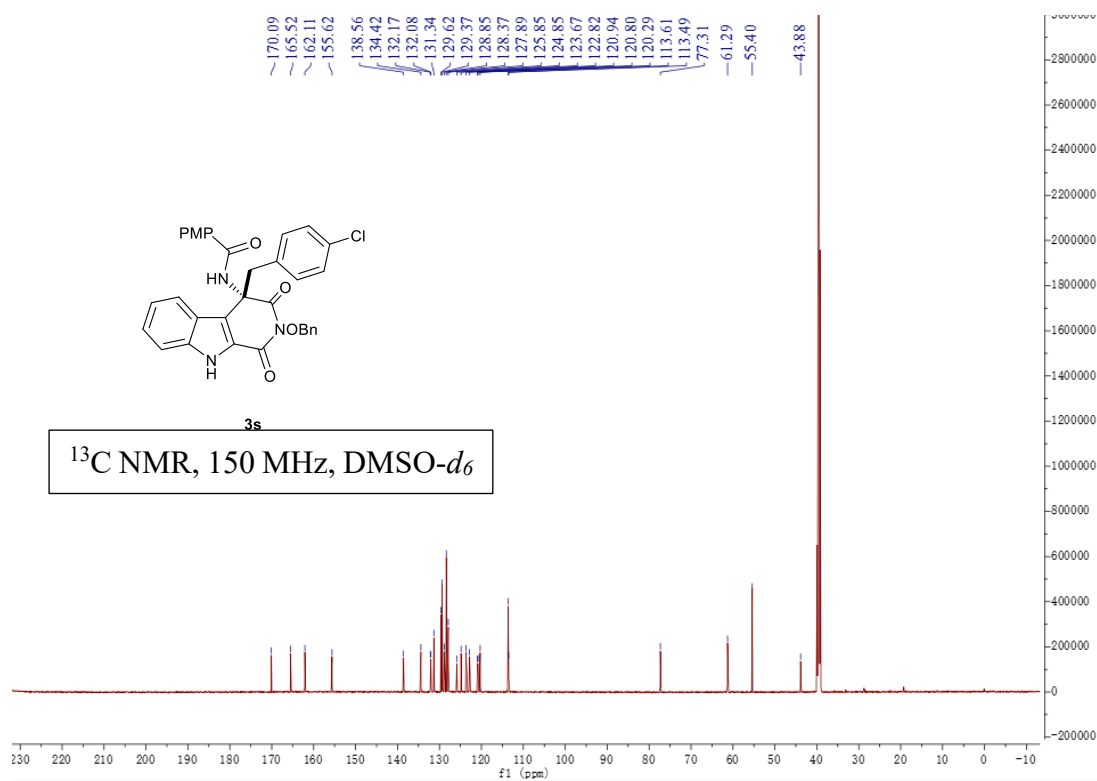

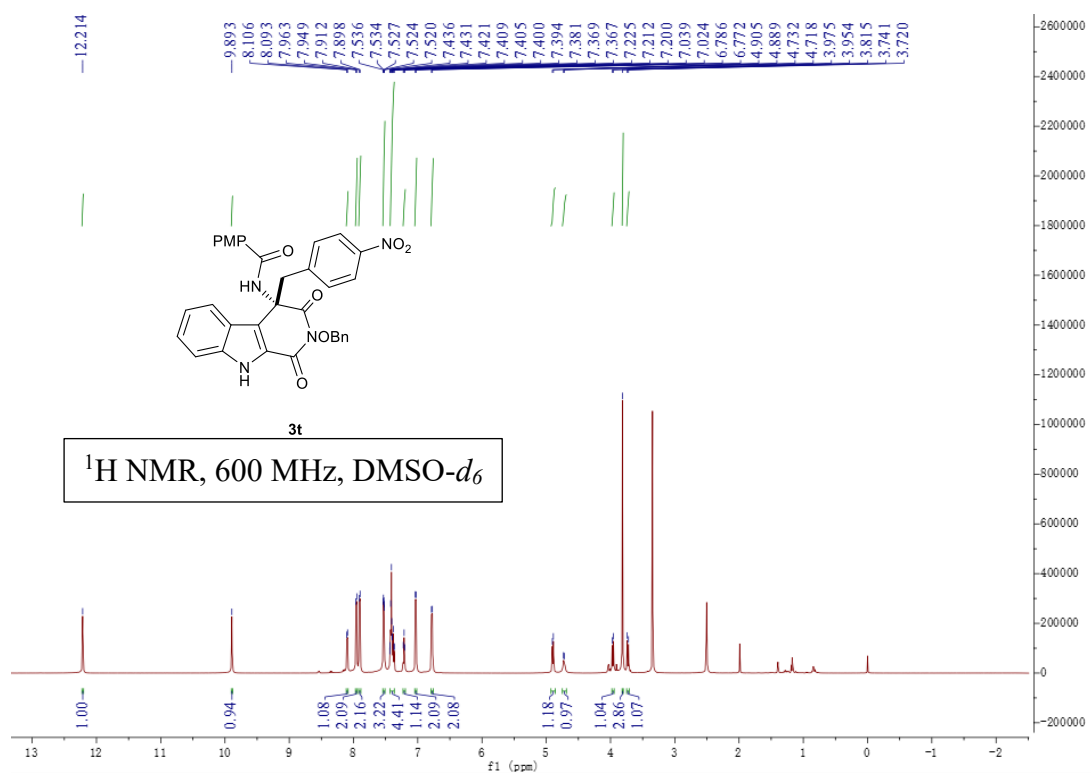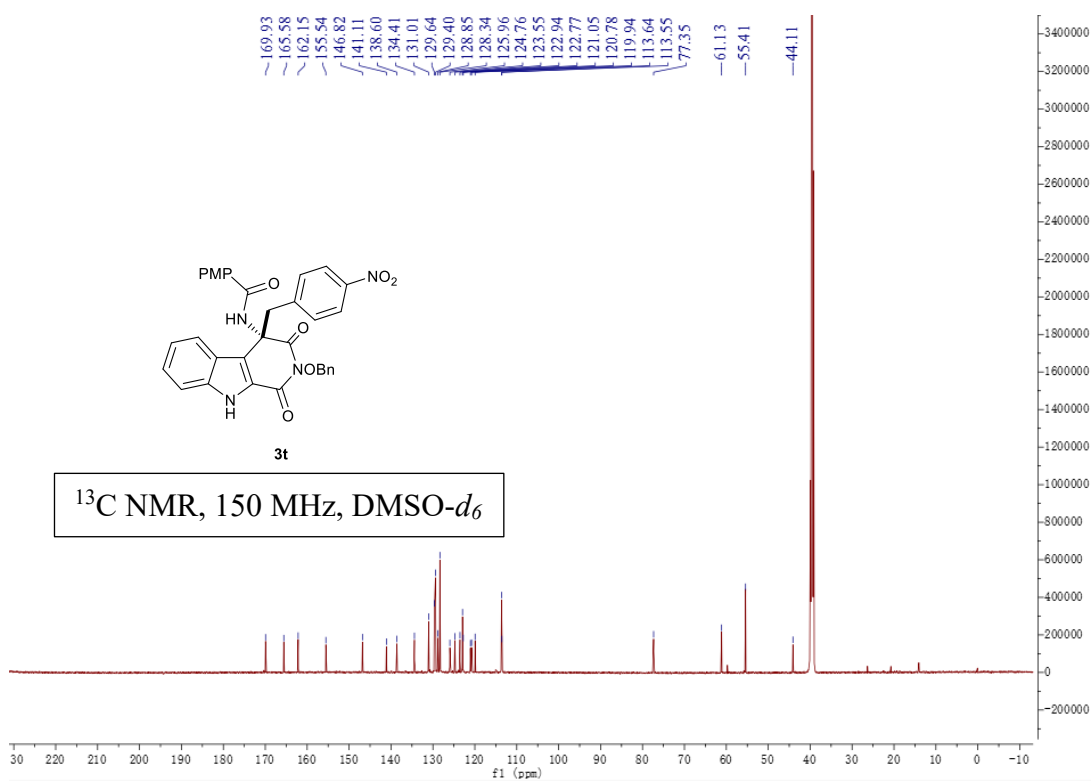

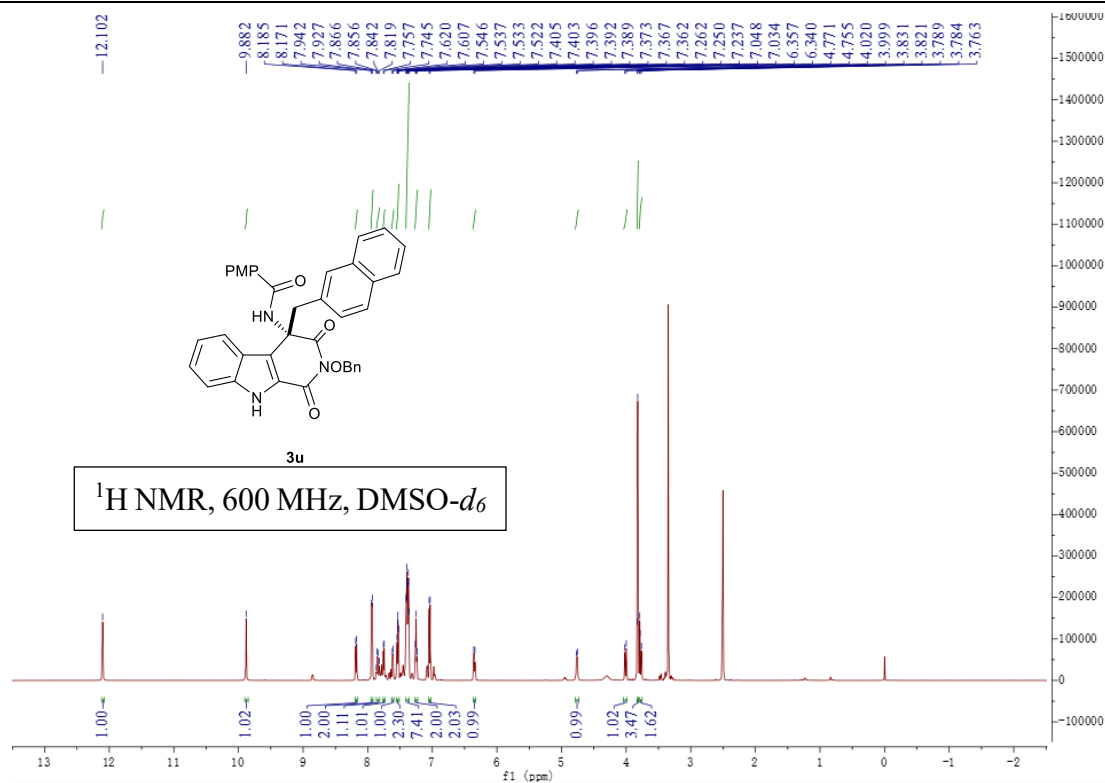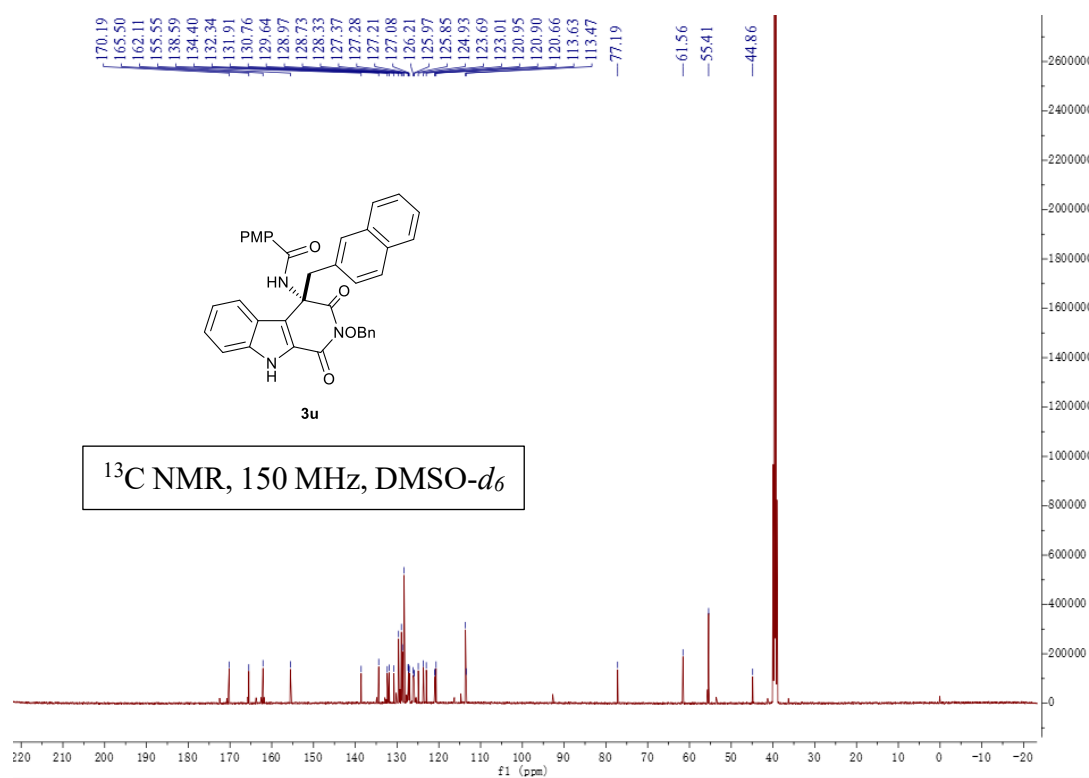



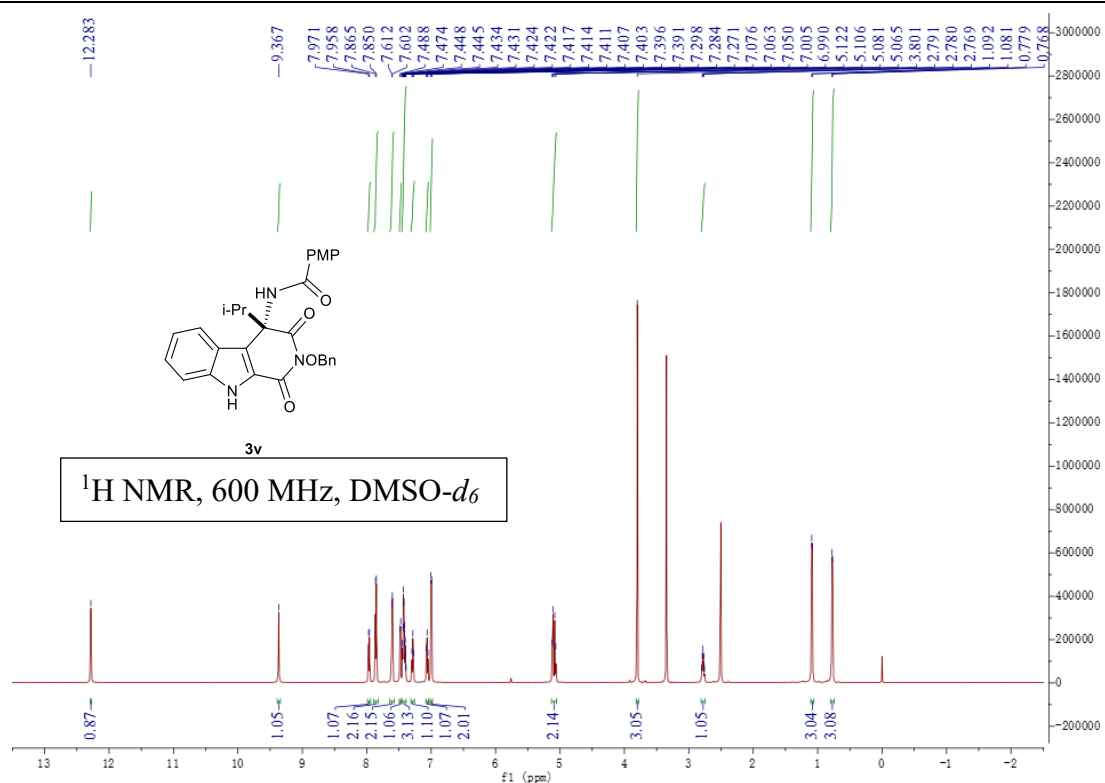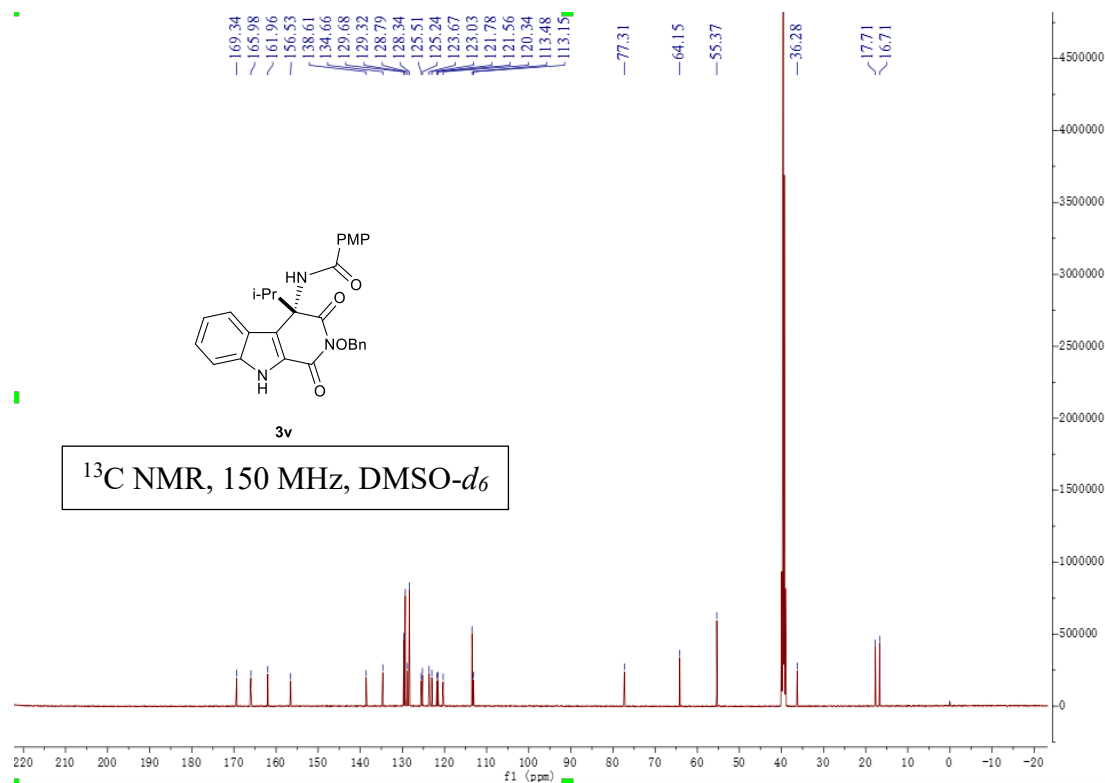



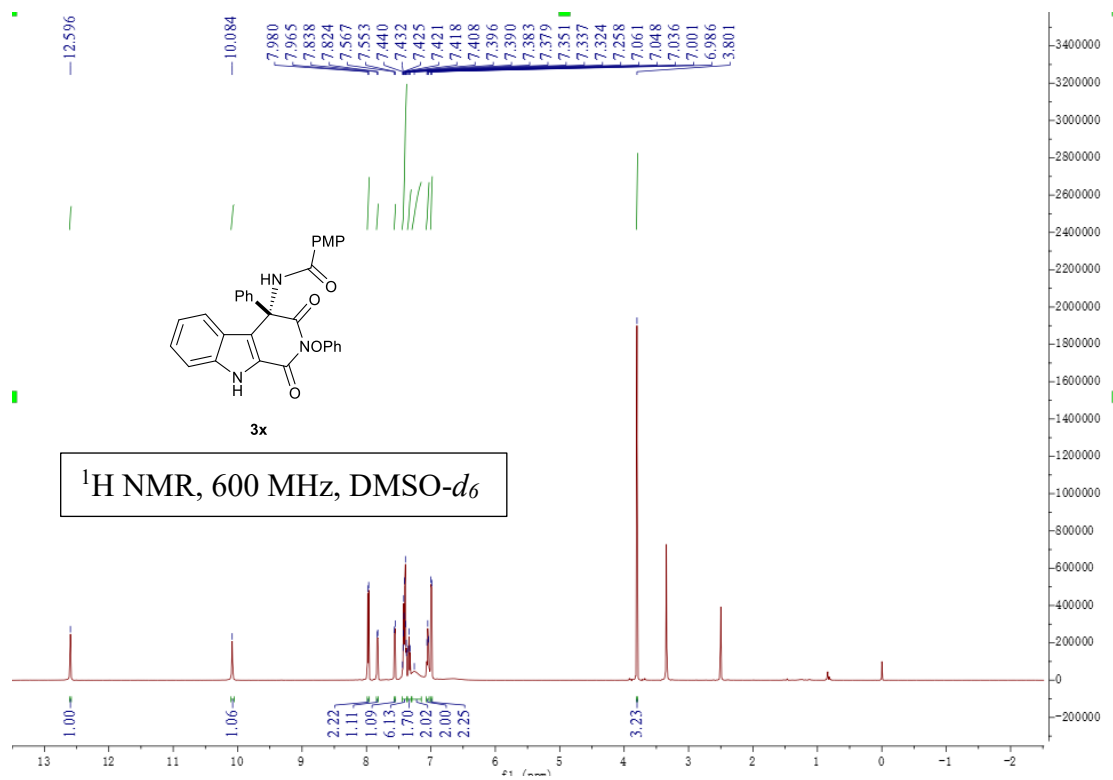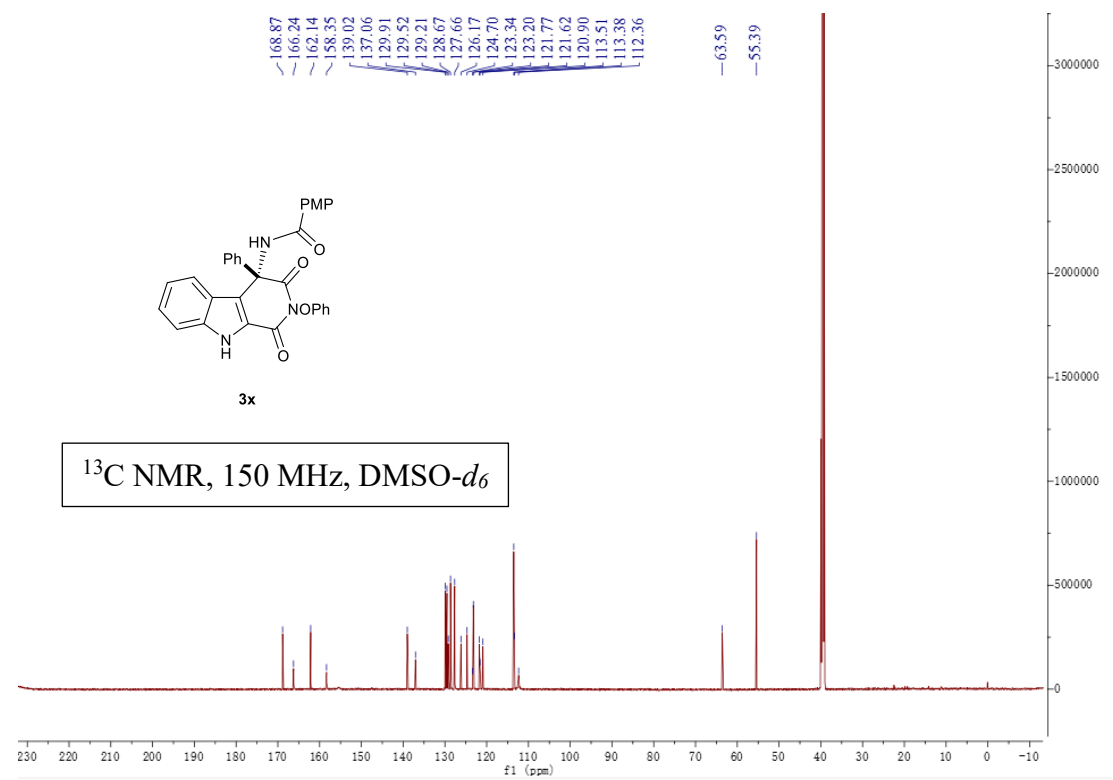

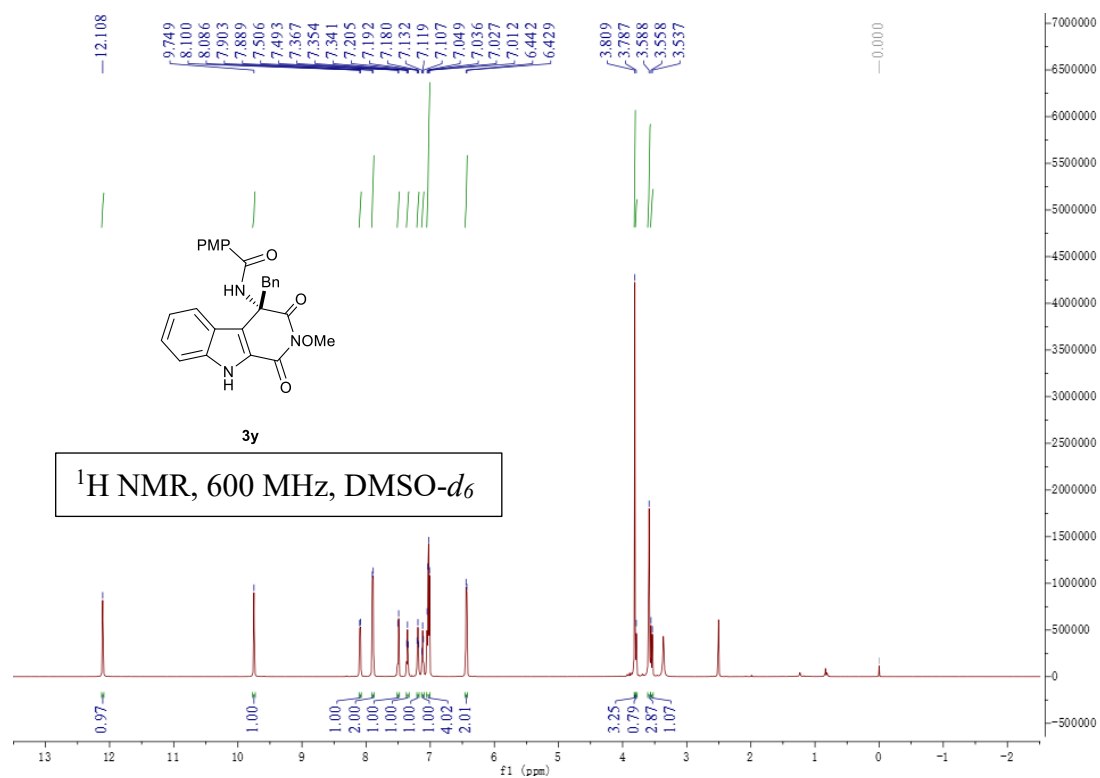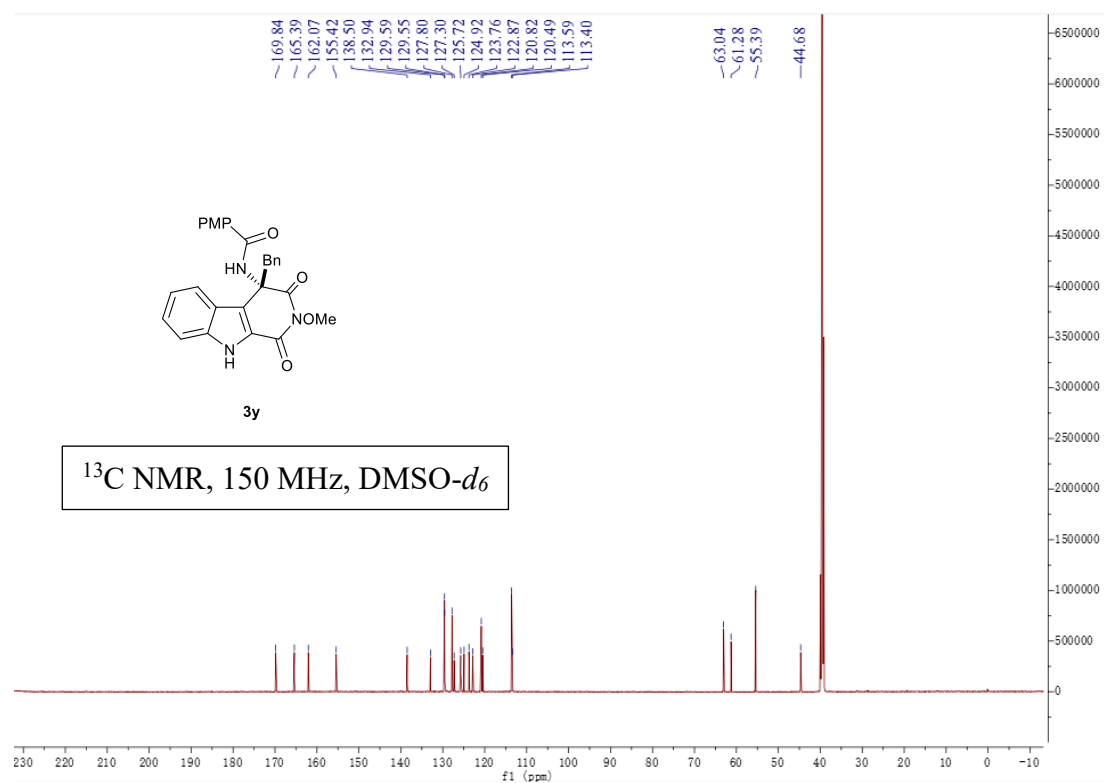

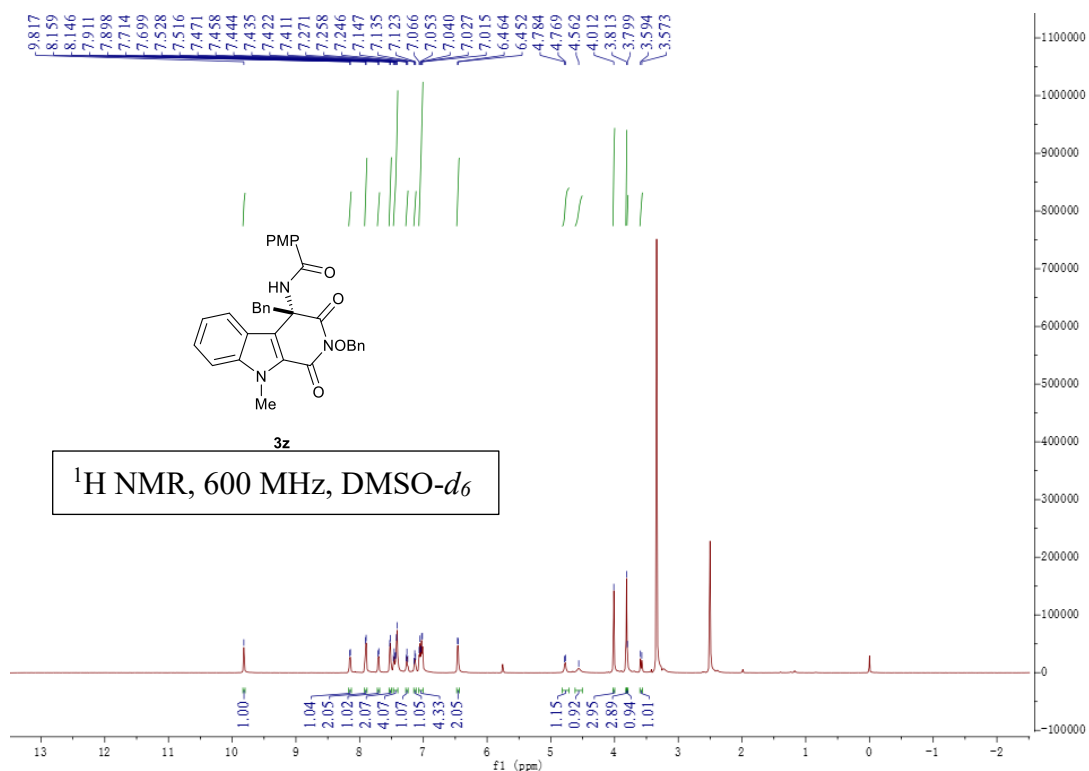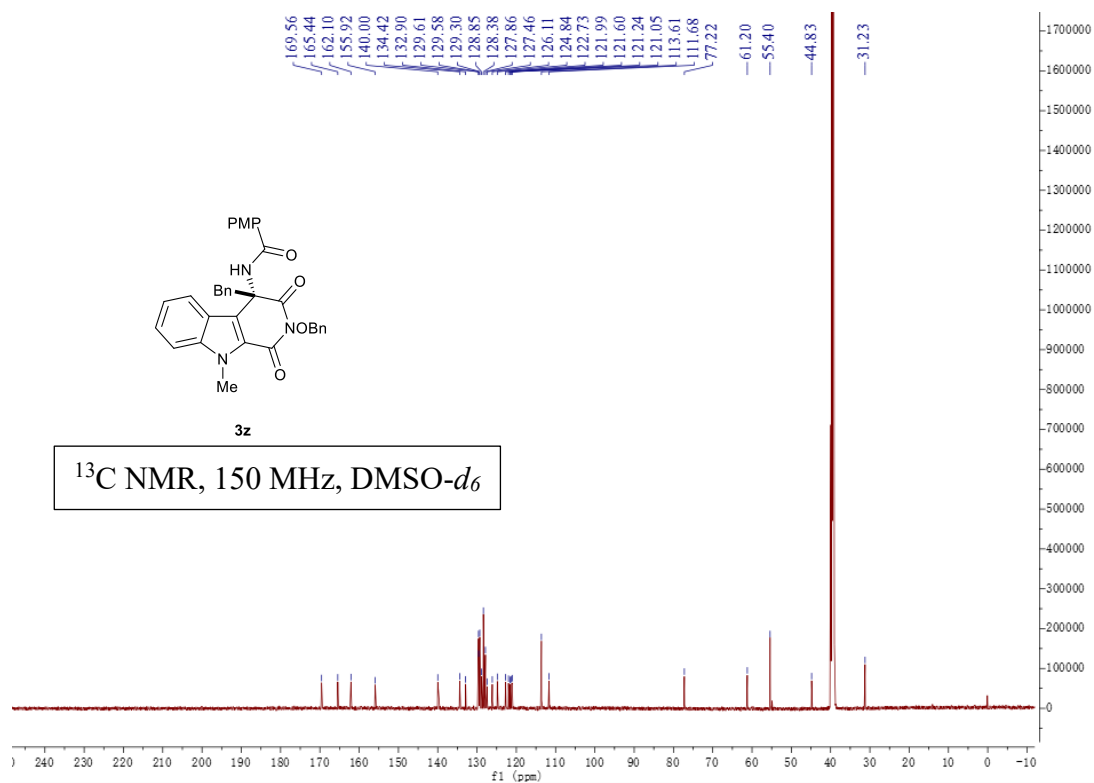

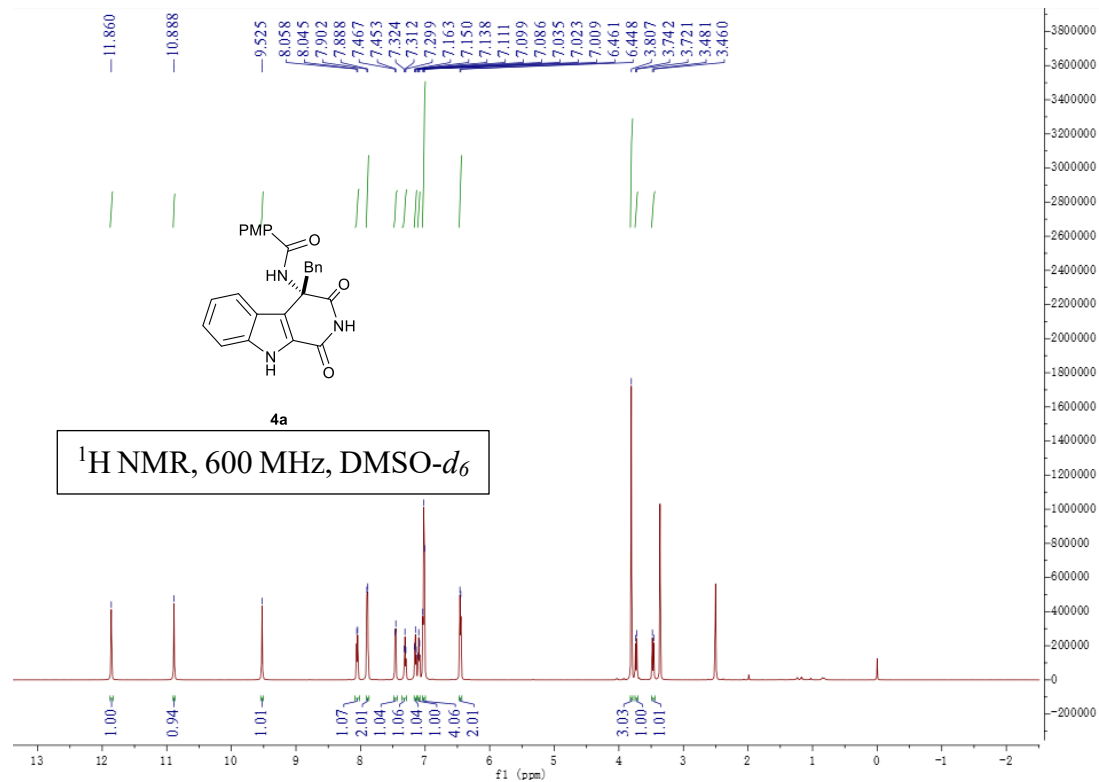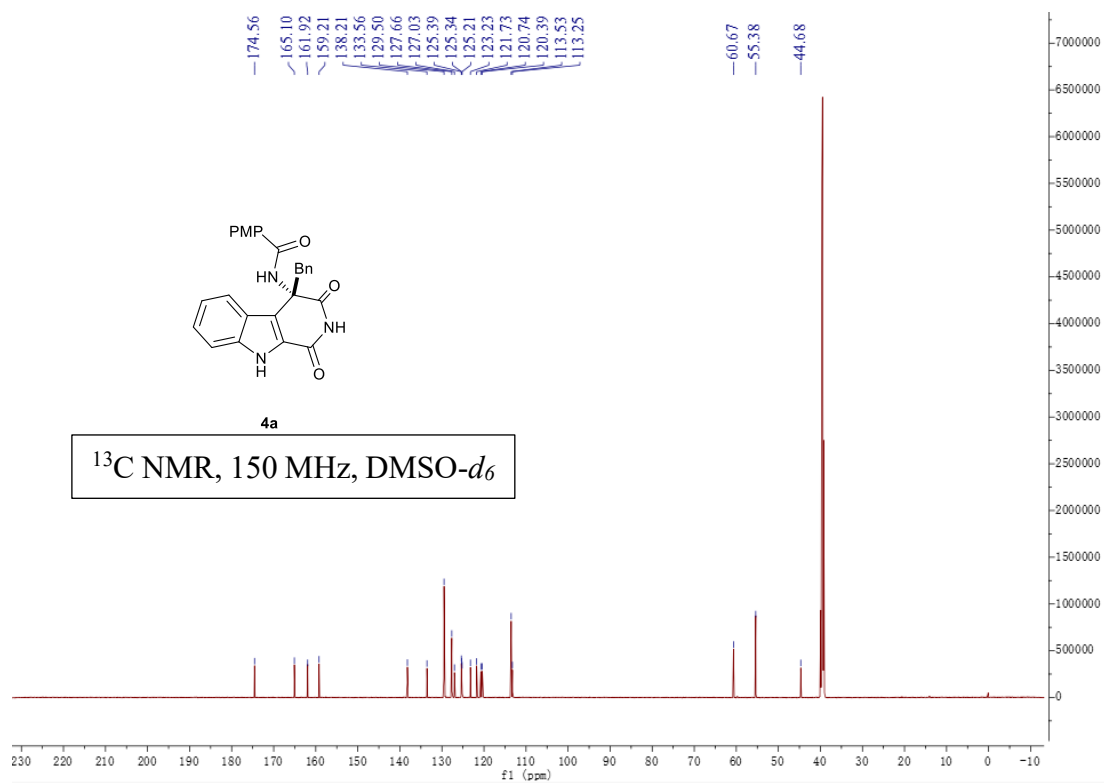

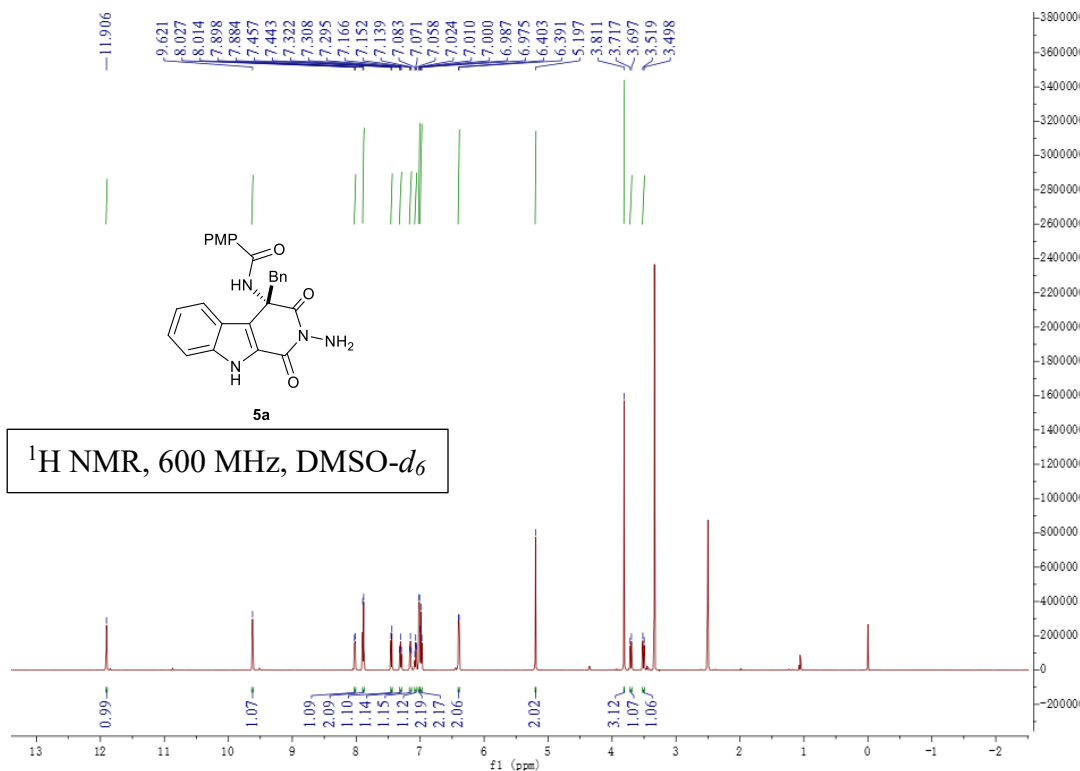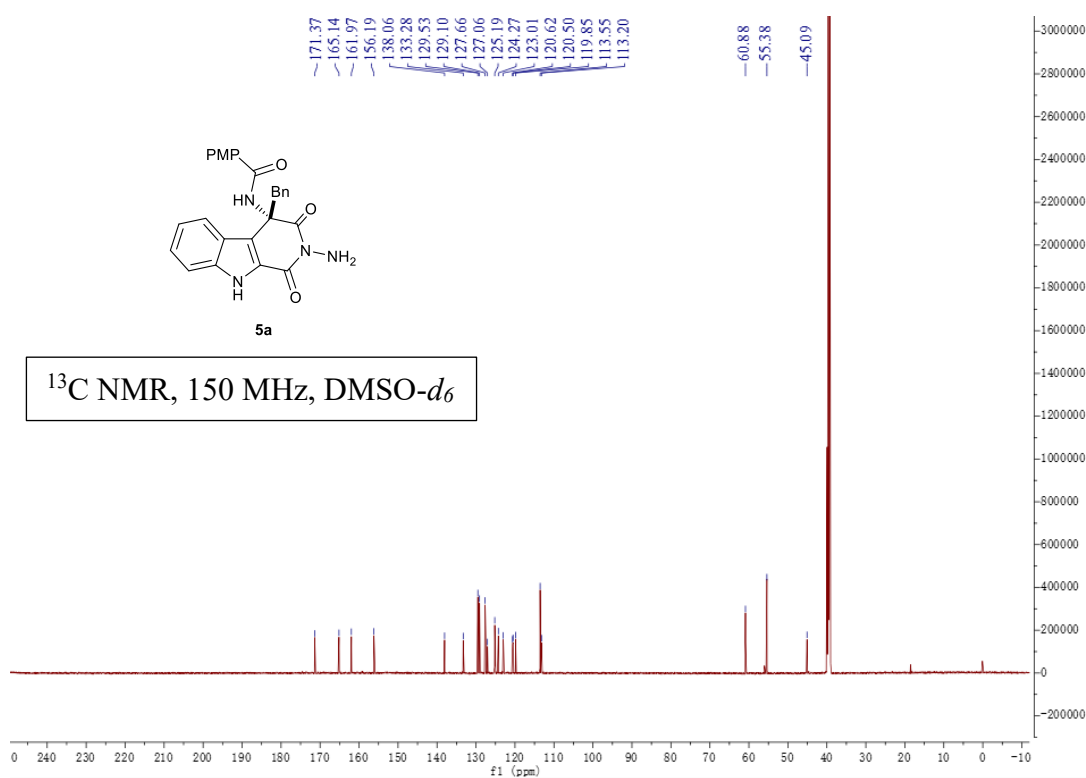

## 9. HPLC spectra

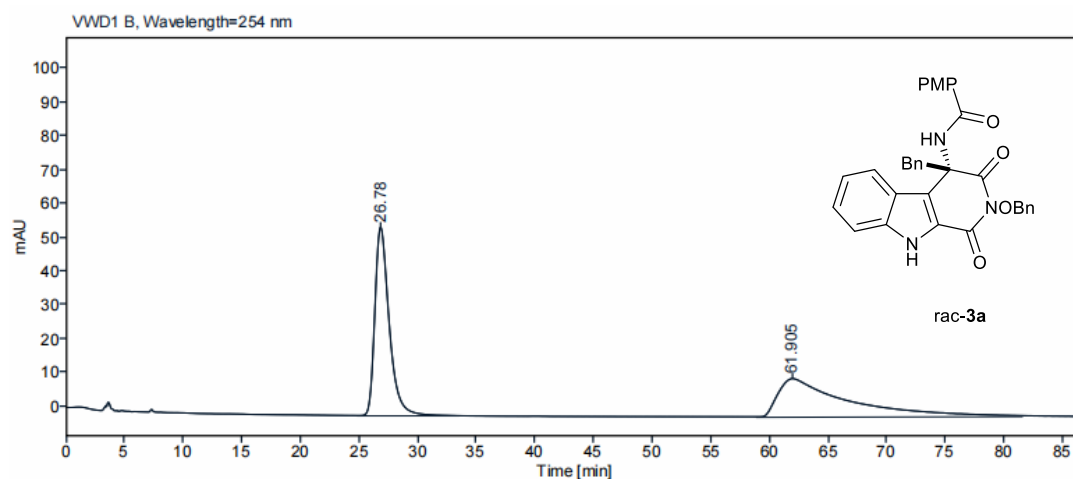

Signal: VWD1 B, Wavelength=254 nm

| RT [min] | Type | Width [min] | Area      | Height  | Area%   | Name |
|----------|------|-------------|-----------|---------|---------|------|
| 26.780   | MM   | 1.4263      | 4765.9429 | 55.6917 | 50.3182 |      |
| 61.905   | MM   | 6.8683      | 4705.6704 | 11.4187 | 49.6818 |      |
| Sum      |      |             | 9471.6133 |         |         |      |

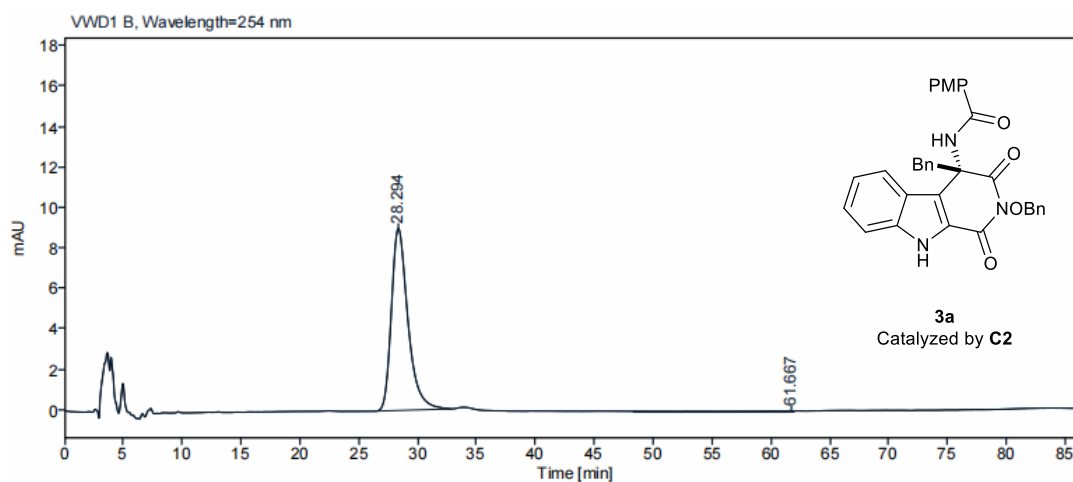

Signal: VWD1 B, Wavelength=254 nm

| RT [min] | Type | Width [min] | Area     | Height | Area%   | Name |
|----------|------|-------------|----------|--------|---------|------|
| 28.294   | BB   | 1.4631      | 879.3219 | 8.9902 | 97.2786 |      |
| 61.667   | MM   | 8.1499      | 24.5997  | 0.0503 | 2.7214  |      |
| Sum      |      |             | 903.9216 |        |         |      |



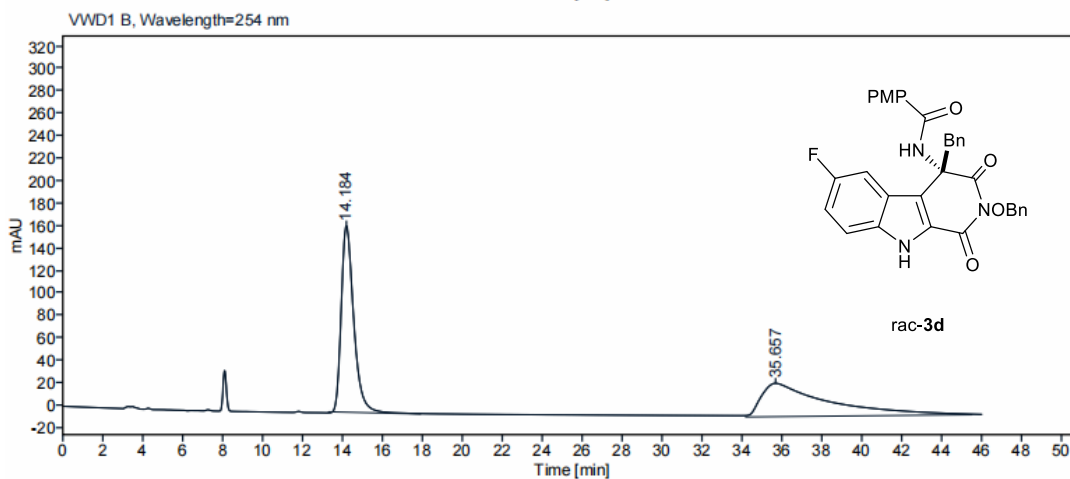

Signal: VWD1 B, Wavelength=254 nm

| RT [min] | Type | Width [min] | Area       | Height   | Area%   | Name |
|----------|------|-------------|------------|----------|---------|------|
| 14.184   | MM   | 0.7256      | 7226.4878  | 165.9963 | 51.1808 |      |
| 35.657   | MM   | 3.8647      | 6893.0396  | 29.7262  | 48.8192 |      |
| Sum      |      |             | 14119.5273 |          |         |      |

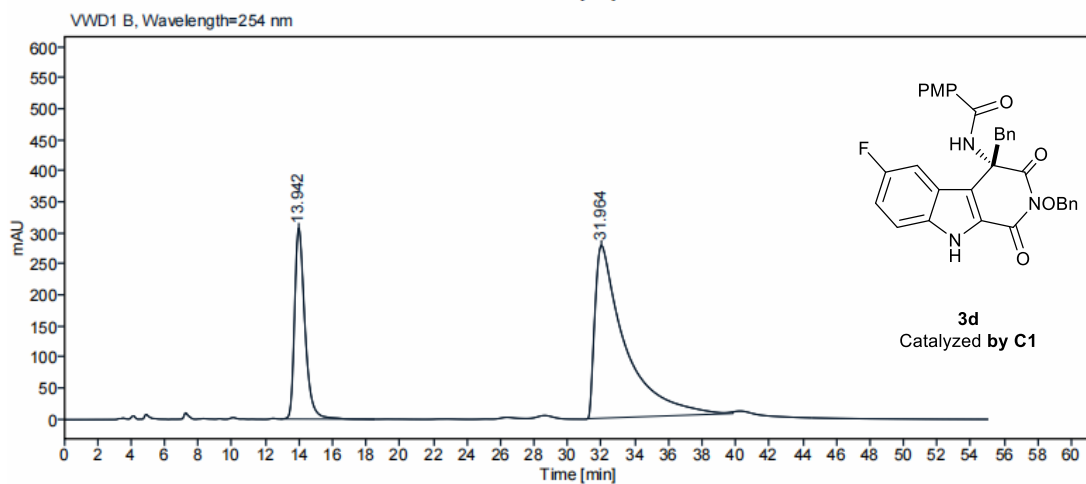

Signal: VWD1 B, Wavelength=254 nm

| RT [min] | Type | Width [min] | Area       | Height   | Area%   | Name |
|----------|------|-------------|------------|----------|---------|------|
| 13.942   | BB   | 0.6493      | 13163.5156 | 307.5609 | 27.4507 |      |
| 31.964   | MM   | 2.0832      | 34789.7695 | 278.3318 | 72.5493 |      |
| Sum      |      |             | 47953.2852 |          |         |      |

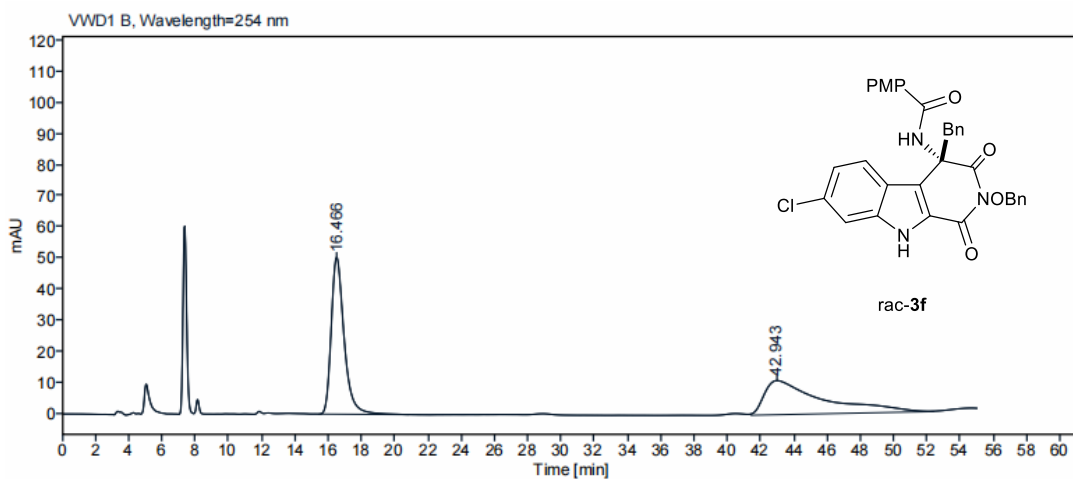

Signal: VWD1 B, Wavelength=254 nm

| RT [min] | Type | Width [min] | Area      | Height  | Area%   | Name |
|----------|------|-------------|-----------|---------|---------|------|
| 16.466   | BB   | 0.8175      | 2723.9736 | 50.4810 | 50.5319 |      |
| 42.943   | MM   | 4.0487      | 2666.6240 | 10.9773 | 49.4681 |      |
| Sum      |      |             | 5390.5977 |         |         |      |

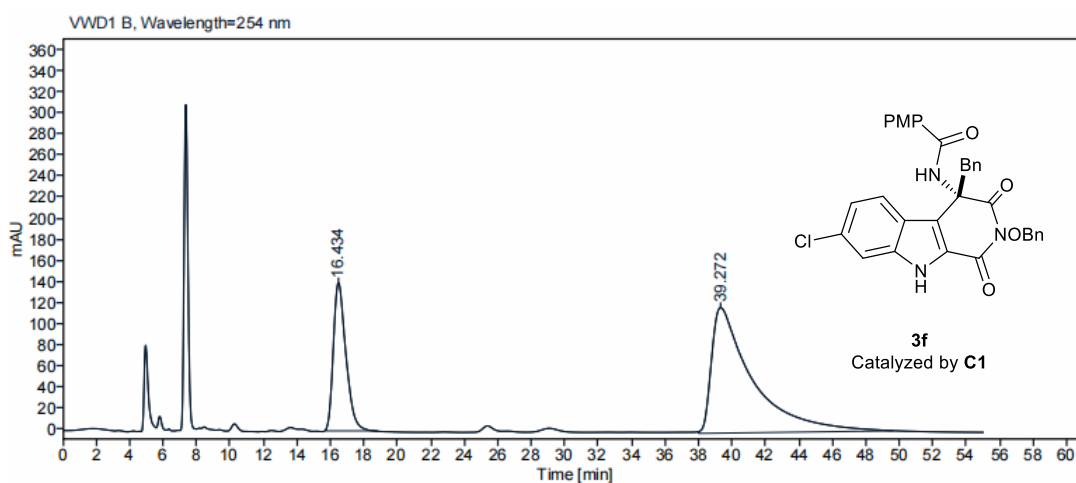

Signal: VWD1 B, Wavelength=254 nm

| RT [min] | Type | Width [min] | Area       | Height   | Area%   | Name |
|----------|------|-------------|------------|----------|---------|------|
| 16.434   | MM   | 0.8697      | 7317.7393  | 140.2402 | 26.6525 |      |
| 39.272   | MM   | 2.8250      | 20138.3262 | 118.8110 | 73.3475 |      |
| Sum      |      |             | 27456.0654 |          |         |      |

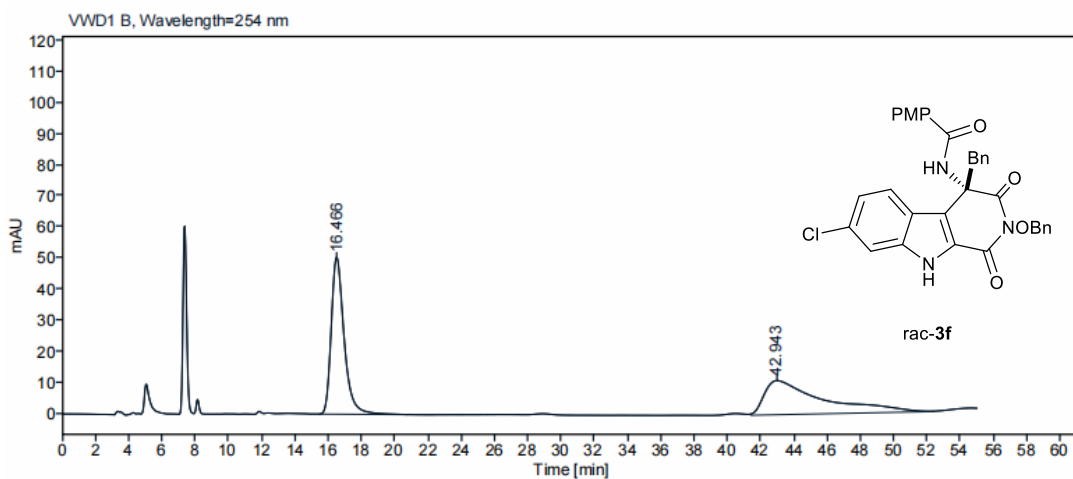

Signal: VWD1 B, Wavelength=254 nm

| RT [min] | Type | Width [min] | Area      | Height  | Area%   | Name |
|----------|------|-------------|-----------|---------|---------|------|
| 16.466   | BB   | 0.8175      | 2723.9736 | 50.4810 | 50.5319 |      |
| 42.943   | MM   | 4.0487      | 2666.6240 | 10.9773 | 49.4681 |      |
| Sum      |      |             | 5390.5977 |         |         |      |

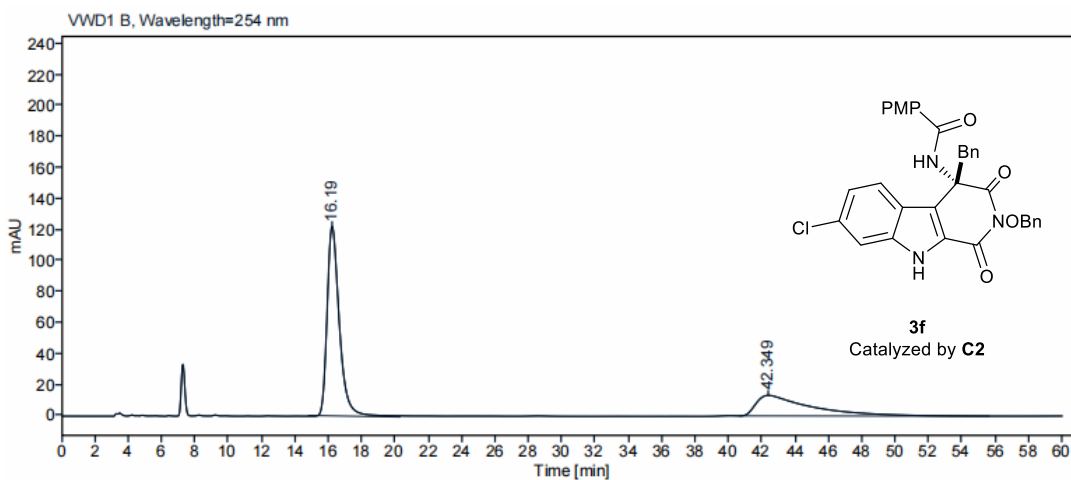

Signal: VWD1 B, Wavelength=254 nm

| RT [min] | Type | Width [min] | Area      | Height   | Area%   | Name |
|----------|------|-------------|-----------|----------|---------|------|
| 16.190   | BB   | 0.7713      | 6220.8828 | 122.3197 | 67.4182 |      |
| 42.349   | BB   | 3.0238      | 3006.4167 | 13.2270  | 32.5818 |      |
| Sum      |      |             | 9227.2996 |          |         |      |

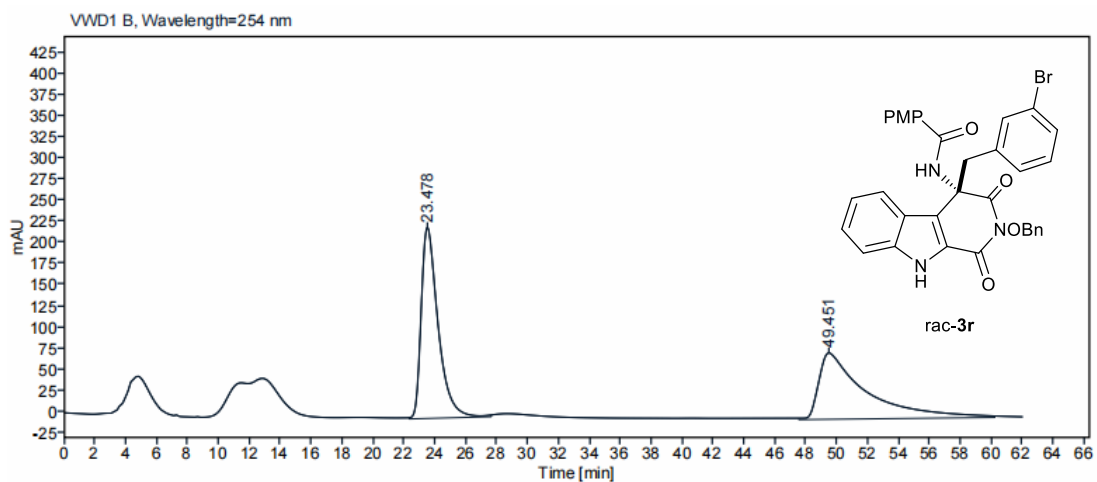

Signal: VWD1 B, Wavelength=254 nm

| RT [min] | Type | Width [min] | Area       | Height   | Area%   | Name |
|----------|------|-------------|------------|----------|---------|------|
| 23.478   | MM   | 1.2651      | 17143.7500 | 225.8554 | 50.8053 |      |
| 49.451   | MM   | 3.5266      | 16600.2480 | 78.4535  | 49.1947 |      |
| Sum      |      |             | 33743.9980 |          |         |      |

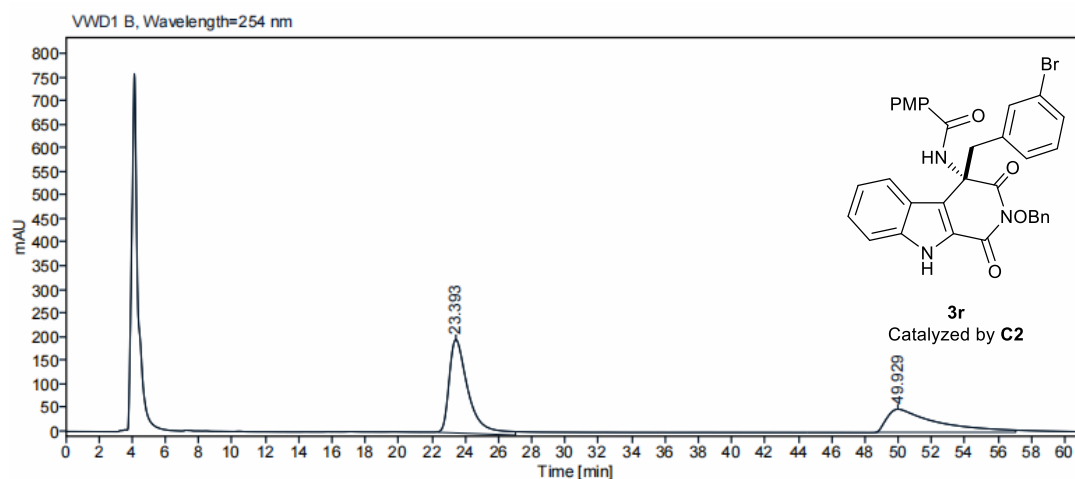

Signal: VWD1 B, Wavelength=254 nm

| RT [min] | Type | Width [min] | Area       | Height   | Area%   | Name |
|----------|------|-------------|------------|----------|---------|------|
| 23.393   | MM   | 1.3246      | 15728.6631 | 197.9113 | 60.7606 |      |
| 49.929   | MM   | 3.4554      | 10157.6260 | 48.9946  | 39.2394 |      |
| Sum      |      |             | 25886.2891 |          |         |      |

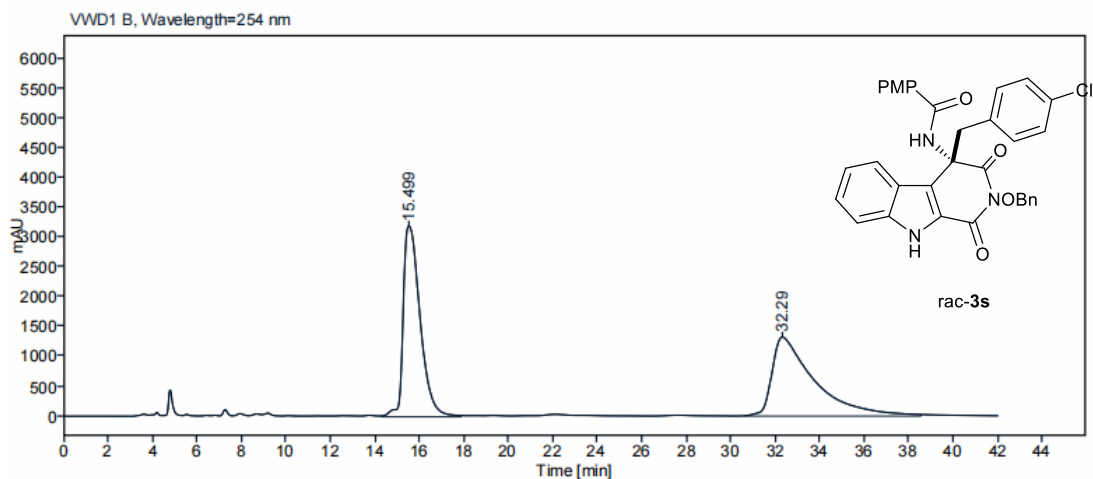

Signal: VWD1 B, Wavelength=254 nm

| RT [min] | Type | Width [min] | Area        | Height    | Area%   | Name |
|----------|------|-------------|-------------|-----------|---------|------|
| 15.499   | MM   | 0.8808      | 169453.9375 | 3206.2834 | 49.1076 |      |
| 32.290   | MM   | 2.2041      | 175612.9375 | 1327.9015 | 50.8924 |      |
| Sum      |      |             | 345066.8750 |           |         |      |

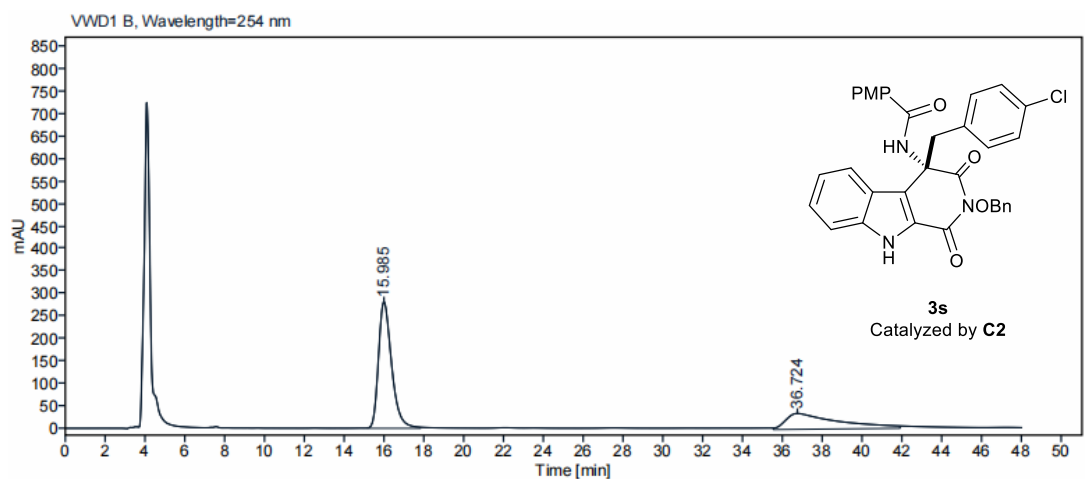

Signal: VWD1 B, Wavelength=254 nm

| RT [min] | Type | Width [min] | Area       | Height   | Area%   | Name |
|----------|------|-------------|------------|----------|---------|------|
| 15.985   | MM   | 0.7637      | 12932.8350 | 282.2520 | 66.5276 |      |
| 36.724   | MM   | 3.0596      | 6506.9619  | 35.4454  | 33.4724 |      |
| Sum      |      |             | 19439.7969 |          |         |      |

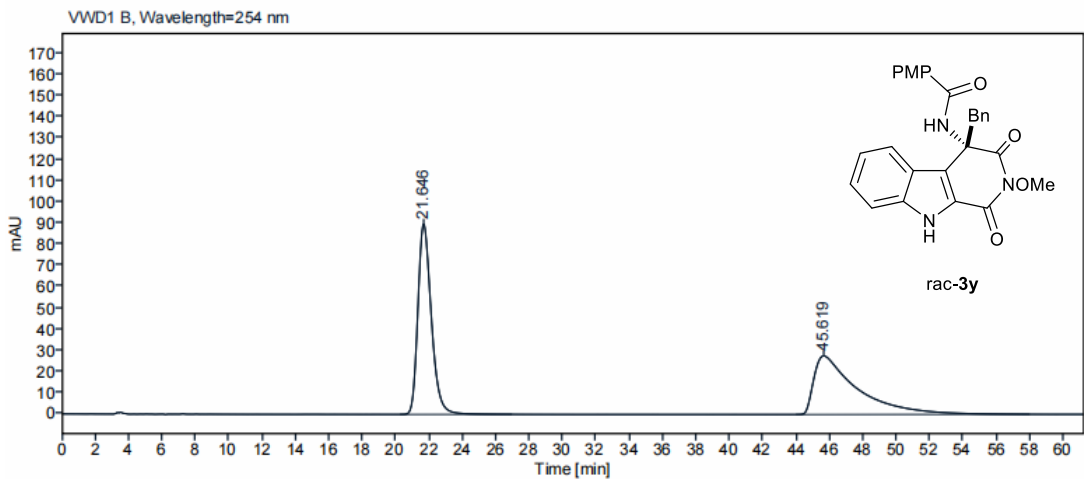

Signal: VWD1 B, Wavelength=254 nm

| RT [min] | Type | Width [min] | Area      | Height  | Area%   | Name |
|----------|------|-------------|-----------|---------|---------|------|
| 21.646   | BB   | 0.8591      | 5027.4756 | 89.8066 | 50.3052 |      |
| 45.619   | BB   | 2.4790      | 4966.4775 | 27.6307 | 49.6948 |      |
| Sum      |      |             | 9993.9531 |         |         |      |

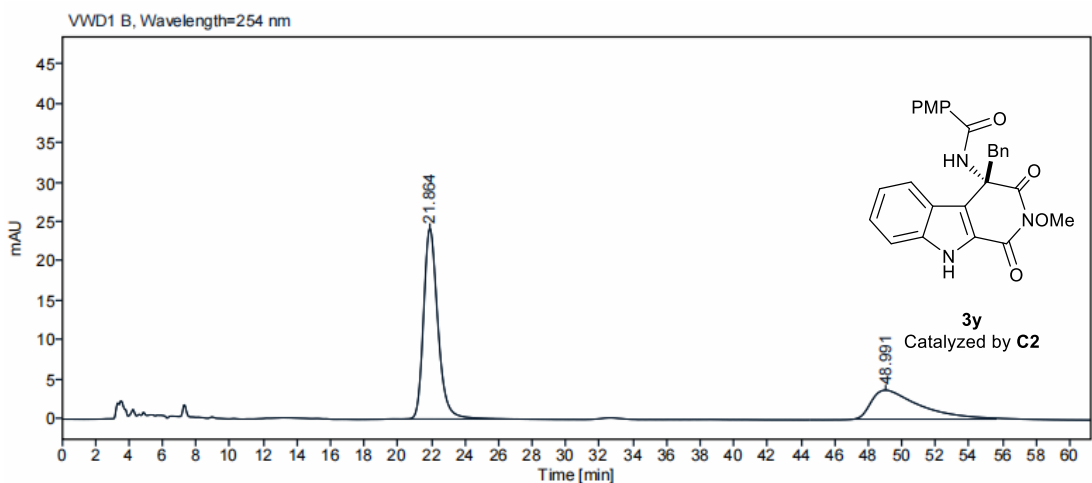

Signal: VWD1 B, Wavelength=254 nm

| RT [min] | Type | Width [min] | Area      | Height  | Area%   | Name |
|----------|------|-------------|-----------|---------|---------|------|
| 21.864   | BB   | 0.9020      | 1431.2595 | 24.1992 | 66.0888 |      |
| 48.991   | MM   | 3.3193      | 734.4022  | 3.6876  | 33.9112 |      |
| Sum      |      |             | 2165.6617 |         |         |      |

---

## 10. References

- [1] S. K. Nimmagadda, M. Liu, M. K. Karunananda, D. W. Gao, O. Apolinar, J. S. Chen, P. Liu and K. M. Engle, Catalytic, Enantioselective  $\alpha$ -Alkylation of Azlactones with Nonconjugated Alkenes by Directed Nucleopalladation, *Angew. Chem. Int. Ed.*, 2019, **58**, 3923-3927.
- [2] M. Schlegel and C. Schneider, Iron(III)-Catalyzed (4 + 2)-Cycloannulation of 2-Hydroxy Ketoxime Ethers with Indol-2-ylamides: Synthesis of Indole-Fused 2-Piperidinones, *J. Org. Chem.*, 2019, **84**, 5886-5892.
- [3] A. Acharya, D. Anumandla and C. S. Jeffrey, Dearomative Indole Cycloaddition Reactions of Aza-Oxyallyl Cationic Intermediates: Modular Access to Pyrroloindolines, *J. Am. Chem. Soc.*, 2015, **137**, 14858-14860.
- [4] M. A. Kuznetsov, A. N. Shestakov, M. Zibinsky, M. Krasavin, C. T. Supuran, S. Kalinin and M. Tanç, Synthesis, structure and properties of *N*-aminosaccharin – A selective inhibitor of human carbonic anhydrase I, *Tetrahedron Lett.*, 2017, **58**, 172-174.

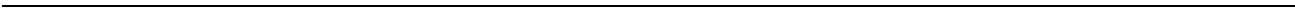

Supplement: d3qo01184d1.pdf [file d3qo01184d1.pdf]
